# Supplementary material
Source: publisher figshare collection journal article supplement (https://adisjournals.figshare.com/articles/dataset/_/11320370)
Supplement: Supplementary file 1 [file 4]

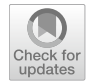

# Glucagon-like-Peptid-1-Rezeptoragonisten beim Typ-2-Diabetes-mellitus: Ihre Anwendung und Unterschiede

Katherine A. Lyseng-Williamson<sup>1</sup>

Online veröffentlicht: 18. Juli 2019  
© Springer Nature 2019, korrigierte Publikation 2019

## Abstract

Glucagon-like-Peptid-1-Rezeptoragonisten (GLP-1RA) haben als Monotherapie oder in Kombination mit oralen blutzuckersenkenden Wirkstoffen ± Insulin als Ergänzung zu Lebensstiländerungen einen etablierten Platz bei der Behandlung des Typ-2-Diabetes (T2D). Die sechs subkutanen GLP-1RA-Formulierungen (d. h. zweimal täglich Exenatid, einmal täglich Liraglutid bzw. Lixisenatid und einmal wöchentlich Dulaglutid, Exenatid bzw. Semaglutid), die derzeit in der EU und in den USA erhältlich sind, haben neben vielen Ähnlichkeiten jeweils auch individuelle Merkmale und Eigenschaften. GLP-1RA stimulieren GLP-1-Rezeptoren und erhöhen dadurch die Insulin-Sekretion und unterdrücken die Glucagon-Sekretion. Diese Wirkung ist vom Blutzuckerspiegel abhängig, was zu verbesserten Ergebnissen bei klinischen Endpunkten und Patient-Reported Outcomes führt, die mit der Blutzuckerkontrolle und dem Körpergewicht zusammenhängen. Darüber hinaus wurde gezeigt, dass die Wirkstoffe das Risiko für schwere kardiovaskuläre Ereignisse verringern oder zumindest nicht erhöhen. GLP-1RA werden im Allgemeinen gut vertragen. Von den arzneimittelbedingten unerwünschten Ereignissen werden vor allem gastrointestinale Ereignisse und Reaktionen an der Injektionsstelle als störend empfunden. Dagegen sind die Wirkstoffe mit einem sehr geringen intrinsischen Hypoglykämie-Risiko assoziiert. Bei der Wahl eines GLP-1RA sind der klinische Bedarf und die persönlichen Präferenzen des individuellen Patienten zu berücksichtigen.

## Das Wichtigste in Kürze

GLP-1RA bewirken bei Verabreichung als Monotherapie oder Add-on-Therapie zu anderen blutzuckersenkenden Wirkstoffen eine Verbesserung der Blutzuckerkontrolle, reduzieren das Körpergewicht und verbessern die Patient-reported Outcomes.

GLP-1RA reduzieren das Risiko für schwere kardiovaskuläre Ereignisse bzw. erhöhen es zumindest nicht.

GLP-1RA werden im Allgemeinen gut vertragen und haben ein sehr niedriges intrinsisches Hypoglykämie-Risiko.

Die einmal wöchentliche Anwendung eines GLP-1RA kann gegenüber einer häufigeren Behandlung die Adhärenz (Therapietreue) und Zufriedenheit der Patienten erhöhen.

Bei der Wahl des individuellen Behandlungsregimes sind klinische und die Verabreichung betreffende Unterschiede zwischen den verschiedenen GLP-1RA sowie die Präferenzen des Patienten zu berücksichtigen.

## 1 Grundlage für die Anwendung von GLP-1RA beim Typ-2-Diabetes

Viele Patienten mit Typ-2-Diabetes benötigen zwei oder mehr blutzuckersenkende Substanzen [1, 2]. Sofern keine Kontraindikationen oder Verträglichkeitsprobleme bestehen, wird oft Metformin als Erstlinientherapie verordnet. In der Regel werden jedoch für eine adäquate Blutzuckereinstellung weitere blutzuckersenkende Wirkstoffe mit anderen Wirkmechanismen benötigt.

Das Glucagon-like-Peptid-1 (GLP-1) – ein intestinales Hormon, das u. a. die Insulin-Sekretion nach dem Essen erhöht – spielt eine wichtige Rolle für die Blutzuckerregulation [3]. Bei Patienten mit T2D ist die Wirkung von GLP-1 gestört, was die Grundlage für die Entwicklung von GLP-1-Rezeptoragonisten (GLP-1RA) für die Behandlung des T2D war [3]. Diese Wirkstoffe

✉ Katherine A. Lyseng-Williamson  
DEcorrespondence@springer.com

<sup>1</sup> Springe Nature, Private Bag 65901, Mairangi Bay, Auckland 0754, Neuseeland

verbessern nachgewiesenermaßen bei Patienten mit Typ-2-Diabetes die Blutzuckerkontrolle. Im Gegensatz zu Insulin und Insulin-Sekretagoga (z. B. Sulfonylharnstoffe und Glinide) induzieren sie eine Gewichtsreduktion und sind mit einem niedrigen intrinsischen Hypoglykämie-Risiko assoziiert [3].

Der vorliegende Beitrag bietet eine Übersicht über die Merkmale und Eigenschaften der sechs GLP-1RA-Formulierungen, die derzeit in der EU und in den USA auf dem Markt erhältlich sind. Diese werden subkutan verabreicht, und zwar entweder zweimal täglich (schnell freigesetztes Exenatid [4, 5]), einmal täglich (Liraglutid [6, 7] und Lixisenatid [8, 9]); oder einmal wöchentlich (Dulaglutid [10, 11], retardiertes Exenatid [12–14] und Semaglutid [15, 16]). GLP-1RA, die aus kommerziellen Gründen freiwillig vom Markt genommen wurden (z. B. Albiglutid) oder derzeit nur außerhalb der EU/USA (z. B. Taspoglutid) oder als Fixdosis-Kombinationen (z. B. Insulin degludec/Liraglutid und Insulin glargin/Lixisenatid) erhältlich sind, werden in dieser Übersichtsarbeit nicht besprochen.

## 2 Pharmakologische Eigenschaften von GLP-1RA

Natives GLP-1 hat eine sehr kurze Halbwertszeit und wird schnell durch Proteasen abgebaut, und zwar durch das Enzym Dipeptidylpeptidase(DPP)-4 [17–19]. Um den schnellen Abbau zu umgehen, wurden GLP-1RA entwickelt, die eine ähnliche Aminosäuresequenz haben wie GLP-1, aber so modifiziert wurden, dass sie gegenüber einem Abbau durch DPP4 stabil sind und/oder eine minimale renale Clearance aufweisen. Dies verlängert die Wirkdauer dieser Substanzen (Tabelle 1). Strukturelle Unterschiede zwischen den GLP-1RA haben darüber hinaus Einfluss auf die Penetration in das ZNS, was Unterschiede zwischen den einzelnen GLP-1RA im Hinblick auf eine Reduktion des Körpergewichts zum Teil erklären kann (Tabelle 2). Die Ähnlichkeit (Homologie) von GLP-1RA mit der Struktur von humanem GLP-1 (d. h. der Anteil der Aminosäuresequenz, der der Sequenz von nativem GLP entspricht) reicht von etwa 50 % bei Exenatid und Lixisenatid (die von dem Exendin-4-Molekül im Venom der Gila-Krustenechse abgeleitet wurden) bis 90–97 % bei Lixisenatid, Dulaglutid und Semaglutid (die durch Modifikation des aktiven Fragments von humanem GLP-1 entwickelt wurden) (Tabelle 1) [4–16].

GLP-1RA binden selektiv an GLP-1-Rezeptoren und aktivieren diese in gleicher Weise wie GLP-1 [4–16]. Bei hohem Blutzuckerspiegel stimuliert die Aktivierung der GLP-1-Rezeptoren durch GLP-1RA die Insulin-Sekretion und senkt eine unangemessen hohe Glucagon-Sekretion. Diese Wirkung ist vom Blutzuckerspiegel abhängig, sodass die Blutzuckerkontrolle verbessert wird. Bei niedrigem

Blutzuckerspiegel bewirken GLP-1RA keine Stimulation der Insulin-Sekretion bzw. keine Hemmung der Glucagon-Sekretion, was ebenfalls die Blutzuckerkontrolle begünstigt, da dies das Hypoglykämie-Risiko senkt [17–20]. Ein vermindertes Hungergefühl und die niedrigere Energiezufuhr unterstützen darüber hinaus die Gewichtsreduktion bei den Patienten.

Die verschiedenen GLP-1RA haben unterschiedliche pharmakologische Profile und eine unterschiedliche Wirkdauer, was auf mehrere Faktoren zurückzuführen ist wie die Resorptionsrate, das Ausmaß der Bindung an Albumin/Plasmaproteine, der Grad des Schutzes gegen einen metabolischen Abbau und die renale Clearance (Tabelle 1) [17–20]. Auf Grundlage der Aktivierungsdauer des GLP-1-Rezeptors werden schnell freigesetztes Exenatid und Lixisenatid als kurzwirksame und Liraglutid, Dulaglutid, retardiertes Exenatid und Semaglutid als langwirksame GLP-1RA eingestuft (Tabelle 1) [17–20]. Kurzwirksame GLP-1RA sind mit einer deutlichen Verzögerung der Magenentleerung assoziiert, was bei langwirksamen GLP-1RA nicht der Fall ist [19].

Die Halbwertszeit von GLP-1RA variiert von wenigen Stunden bis zu mehreren Tagen. Dabei ermöglichen die langen Halbwertszeiten von Dulaglutid und Semaglutid die einmal wöchentliche Verabreichung (Tabelle 1) [4–16]. Auch die retardierte Exenatid-Formulierung kann einmal wöchentlich angewendet werden, da die Mikrosphären in der Formulierung zunächst an die Oberfläche gebundenes Exenatid und später nach und nach Exenatid aus ihrem Inneren freisetzen (Tabelle 1) [12–14].

## 3 Auswirkungen von GLP-1RA auf Blutzuckerkontrolle und Gewichtsreduktion

Die Wirksamkeit von GLP-1RA im Sinne der Blutzuckerkontrolle bei Patienten mit T2D ist umfangreich belegt. Im folgenden Abschnitt werden die Ergebnisse der randomisierten klinischen Studien (RCT-Studien) besprochen, die den Zulassungen von schnell freigesetztem Exenatid [4, 5], Liraglutid [6, 7], Lixisenatid [8, 9], Dulaglutid [10, 11], retardiertem Exenatid [12–14] und Semaglutid [15, 16] in der EU und den USA zugrunde liegen, sowie weitere relevante Daten.

### 3.1 Vergleich mit Placebo, oralen blutzuckersenkenden Wirkstoffen und Insulin

In RCT-Studien zu Patienten mit Typ-2-Diabetes waren GLP-1RA als Monotherapie oder Add-on-Therapie im Hinblick auf die Reduktion des glykosylierten Hämoglobins

Tabelle 1 Pharmakologische Eigenschaften der derzeit auf dem Markt erhältlichen Glucagon-like-Peptid-1-Rezeptoragonisten (GLP-1-RA)

| Parameter                                                             | Zweimal täglich                       | Einmal täglich                                                        | Einmal wöchentlich               |
|-----------------------------------------------------------------------|---------------------------------------|-----------------------------------------------------------------------|----------------------------------|
|                                                                       | Schnell freigesetztes Exenatid [4, 5] | Liraglutid [6, 7]                                                     | Dulaglutid [10, 11]              |
|                                                                       | Exenatid [8, 9]                       | Lixisenatid [8, 9]                                                    | Retardiertes Exenatid [12–14]    |
|                                                                       | Semaglutid [15, 16]                   |                                                                       |                                  |
| <b>Strukturelle Eigenschaften</b>                                     |                                       |                                                                       |                                  |
| Art von Derivat oder Modifikation                                     | Derivat von Exendin-4                 | Modifikation von humanem GLP-1                                        | Derivat von Exendin-4            |
| Molekulargewicht                                                      | ≈ 3.300 Da                            | ≈ 3.700 Da                                                            | ≈ 3.300 Da                       |
| % Homologie der AS-Sequenz zu humanem GLP-1                           | 53                                    | 97                                                                    | 53                               |
| Modifikation der N-terminalen Sequenz für ↑ Resistenz gegenüber DPP-4 | AS-Substitution an Position 2         | keine                                                                 | AS-Substitution an Position 2    |
| Modifikation für ↓ renale Clearance und ↑ Wirkdauer                   | keine                                 | Ergänzung von C16-Fettsäure+Glutaminsäure-Spacer zu AS an Position 26 | keine                            |
| Dauer der Aktivität <sup>c</sup>                                      | kurz                                  | lang                                                                  | lang                             |
| <b>Pharmakokinetische Eigenschaften nach subkutaner Injektion</b>     |                                       |                                                                       |                                  |
| Zeit bis C <sub>max</sub>                                             | 2,1 Stunden                           | 8–12 Stunden                                                          | Woche 2 + Woche 6–7 <sup>d</sup> |
| scheinbares V <sub>d</sub> (l)                                        | 28,3                                  | ≈ 13                                                                  | 28,3                             |
| Plasmaproteinbindung (%)                                              | 9,1                                   | < 98                                                                  | ≈ 12,5                           |
| scheinbare Clearance (l/h)                                            | 9,1                                   | 1,2                                                                   | > 99 (Albumin)                   |
| terminale Halbwertszeit                                               | 2,4 Stunden                           | 13 Stunden                                                            | 0,05                             |
|                                                                       |                                       |                                                                       | ≈ 1 Woche                        |

AS Aminosäure; C<sub>max</sub> maximale Plasmakonzentration; DPP-4 Dipeptidylpeptidase 4; GLP-1 Glucagon-like-Peptid 1; V<sub>d</sub> = Verteilungsvolumen; ↑ = Anstieg(e); ↓ = Abnahme(n);

<sup>a</sup>Äquivalent zu Position 2 in Derivaten von Exendin-4

<sup>b</sup>auch ↓ Immunogenität

<sup>c</sup>auf Grundlage der Dauer der Aktivierung des GLP-1-Rezeptors

<sup>d</sup>langwirksam, da die Mikrosphären-Formulierung zunächst an der Oberfläche gebundenes Exenatid freisetzt (C<sub>max</sub> in Woche 2), gefolgt von einer allmählichen Freisetzung von Exenatid aus dem Inneren der Mikrosphären (C<sub>max</sub> in Woche 6–7) über insgesamt ≈ 10 Wochen

(HbA<sub>1c</sub>) gegenüber dem Ausgangswert signifikant wirksamer als Placebo [4–16]. Darüber hinaus waren GLP-1RA als Monotherapie oder Add-on-Therapie mehreren oralen blutzuckersenkenden Wirkstoffen wie Metformin, Glimepirid (ein Sulfonylharnstoff), Sitagliptin (ein DPP4-Inhibitor), Pioglitazon (ein Thiazolidinedion) und Dapagliflozin (ein Natrium-Glukose-Cotransporter-2[SGLT2]-Inhibitor) sowie Insulin glargin (langwirkend) und Insulin glulisin/lispro (schnellwirkend) im Hinblick auf die Reduktion des HbA<sub>1c</sub>-Werts im Allgemeinen nicht unterlegen oder wirksamer als diese [4–16]. Darüber hinaus waren die GLP-1RA mit signifikanten oder numerischen Verbesserungen bei anderen Variablen der Blutzuckerkontrolle, wie Änderungen der mittleren Serum-/Plasma-Glukosekonzentrationen im Nüchternzustand oder 2 Stunden nach dem Essen, verbunden [4–16].

Dank ihrer Wirksamkeit im Sinne einer Reduktion der HbA<sub>1c</sub>-Konzentration bewirkten GLP-1RA außerdem, dass Patienten ihren HbA<sub>1c</sub>-Zielwert (d. h. HbA<sub>1c</sub> ≤ 6,5 oder < 7 %) erreichten [4–16]. Der Anteil der Patienten, die ihren HbA<sub>1c</sub>-Zielwert erreichten, variierte abhängig vom Design der RCT-Studien (z. B. Studiendauer, Hintergrund- und Vergleichstherapien, Ein- und Ausschlusskriterien, Dosierung des GLP-1RA usw.). Beispielsweise betrug in den in Tabelle 2 aufgeführten RCT-Studien der Prozentsatz der Patienten, die am Studienende einen HbA<sub>1c</sub>-Zielwert von < 7 % erreicht hatten (wo angegeben): unter schnell freigesetztem Exenatid 25–57 %, unter Liraglutid 35–58 %, unter Lixisenatid 25–50 %, unter Dulaglutid 34–71 %, unter retardiertem Exenatid 27–73 % und unter Semaglutid 55–79 % [4–16]. Insgesamt war der Anteil der Patienten, die diesen Zielwert erreichten, in den individuellen RCT-Studien im Allgemeinen unter GLP-1RA signifikant oder numerisch höher als unter Placebo (5–39 %) bzw. unter GLP-1RA vergleichbar wie oder etwas höher als unter oralen blutzuckersenkenden Wirkstoffen (z. B. 48–52 % unter Metformin, 30–40 % unter Sitagliptin, 28–36 % unter Glimepirid und 22–55 % unter Thiazolidinedionen) und Insulin (30–54 % unter Insulin glargin, glulisin oder lispro) [4–16].

In vielen RCT-Studien ging die Behandlung mit GLP-1RA mit einer Gewichtsreduktion einher (Tabelle 2), was bei der Behandlung des T2D ein wichtiger Gesichtspunkt ist. In den meisten RCT-Studien war die Gewichtsreduktion gegenüber dem Ausgangsgewicht unter GLP-1RA ausgeprägter als unter Placebo, wenn die Behandlung als Monotherapie oder als Add-on-Therapie zu einem oder mehreren blutzuckersenkenden Wirkstoffen erfolgte [4–16]. Im Vergleich zu einer Add-on-Therapie mit anderen oralen blutzuckersenkenden Wirkstoffen oder Insulin war die gegenüber dem Ausgangsgewicht erzielte Gewichtsreduktion bei den folgenden Vergleichen unter GLP-1RA signifikant besser: Liraglutid versus Glimepirid, Rosiglitazon und Insulin glargin; Lixisenatid versus Insulin glulisin dreimal täglich;

Dulaglutid versus Sitagliptin und Insulin glargin; retardiertes Exenatid versus Sitagliptin, Pioglitazon und Insulin glargin; und Semaglutid versus Sitagliptin und Insulin glargin (Tabelle 2).

Eine Netzwerk-Metaanalyse zu 17 RCT-Studien zeigte darüber hinaus, dass GLP-1RA mit einer Abnahme des Taillenumfangs gegenüber dem Ausgangswert verbunden waren [21]. Dabei nahm der Taillenumfang unter GLP-1RA stärker ab als unter Placebo, Thiazolidinedionen und Insulin sowie etwas stärker als unter Sitagliptin [21].

### 3.2 Vergleich von GLP-1RA untereinander

Angesichts ihrer pharmakologischen Unterschiede (Tabelle 1) könnten die einzelnen GLP-1RA unterschiedlich wirksam bzw. effektiv sein [18–20, 22]. Allerdings gibt es nur wenige RCT-Studien, in denen die relative Wirksamkeit von Arzneimitteln dieser Klasse direkt verglichen wurde (Tabelle 2). In den verfügbaren direkten Vergleichsstudien war die Reduktion des HbA<sub>1c</sub>-Werts gegenüber dem Ausgangswert bei den folgenden Vergleichen unter dem zuerst genannten Wirkstoff signifikant ausgeprägter: schnell freigesetztes Exenatid 10 µg zweimal täglich vs. Lixisenatid 20 µg/Tag; Liraglutid 1,8 mg/Tag vs. schnell freigesetztes Exenatid 10 µg zweimal täglich; Dulaglutid 0,75 oder 1,5 mg/Woche vs. schnell freigesetztes Exenatid 10 µg zweimal täglich; Semaglutid 0,5 mg/Woche vs. Dulaglutid 0,75 mg/Woche; Semaglutid 1,0 mg/Woche vs. Dulaglutid 1,5 mg/Woche; Semaglutid 1,0 mg/Woche vs. retardiertes Exenatid; es wurde kein signifikanter Unterschied zwischen retardiertem Exenatid und Liraglutid festgestellt (Tabelle 2).

Da sie die Magenentleerung verzögern, wirkten sich kurzwirksame GLP-1RA stärker auf postprandiale Blutzuckerspiegel aus als langwirksame. Dagegen haben die langwirksamen GLP-1RA den pharmakologischen Vorteil, die Plasma-Glukosekonzentration über das gesamte Dosisintervall von 1 Tag oder 1 Woche zu senken [18, 20, 22]. In einer Metaanalyse von RCT-Studien, in denen ein GLP-1RA mit Placebo oder einem anderen GLP-1RA verglichen wurde [23], bewirkten Dulaglutid, Exenatid, Liraglutid und Lixisenatid im Vergleich zu Placebo eine Verbesserung des HbA<sub>1c</sub>-Werts und der Glukose-Plasmakonzentration im Nüchternzustand (zum Zeitpunkt der Metaanalyse lagen keine Daten zu Semaglutid vor). Insgesamt waren die langwirksamen GLP-1RA (einmal wöchentlich Dulaglutid, einmal täglich Liraglutid und einmal wöchentlich retardiertes Exenatid) den kurzwirksamen Wirkstoffen (zweimal täglich Exenatid und einmal täglich Lixisenatid) hinsichtlich einer Verbesserung der Blutzuckerkontrolle überlegen, während ein Vergleich der verschiedenen kurzwirksamen bzw. langwirksamen Substanzen untereinander keine Unterschiede ergab [23]. Angesichts der signifikant höheren Wirksamkeit von Semaglutid, die in randomisierten, kontrollierten

**Tabelle 2** Klinische Wirksamkeit von derzeit auf dem Markt erhältlichen Glucagon-like-Peptid-1-Rezeptoragonisten (GLP-1RA) vs. Placebo und/oder blutzuckersenkenden Wirkstoffen in Phase-III-Studien zu > 250 Patienten mit Typ-2-Diabetes

| Art der Behandlung (Studiendauer)                                           | Vergleichssubstanzen            | Anzahl Patienten | HbA <sub>1c</sub> (%) |                          | Gewicht (kg)    |                          |
|-----------------------------------------------------------------------------|---------------------------------|------------------|-----------------------|--------------------------|-----------------|--------------------------|
|                                                                             |                                 |                  | BL (Mittelwert)       | mittlere Änderung vs. BL | BL (Mittelwert) | mittlere Änderung vs. BL |
| <b>schnell freigesetztes (NR) Exenatid 5 oder 10 µg zweimal täglich [5]</b> |                                 |                  |                       |                          |                 |                          |
| Add-on zu Metformin (30 Wo)                                                 | NR Exenatid 5 µg 2-mal täglich  | 110              | 8,3                   | -0,5 <sup>a**</sup>      | 100             | -1,3 <sup>a</sup>        |
|                                                                             | NR Exenatid 10 µg 2-mal täglich | 113              | 8,2                   | -0,9 <sup>a**</sup>      | 100             | -2,6 <sup>a</sup>        |
|                                                                             | Placebo                         | 113              | 8,2                   | -0,0 <sup>a</sup>        | 101             | -0,2 <sup>a</sup>        |
| Add-on zu Sulfonylharnstoff (30 Wo)                                         | NR Exenatid 5 µg 2-mal täglich  | 125              | 8,5                   | -0,5 <sup>a**</sup>      | 95              | -1,1 <sup>a</sup>        |
|                                                                             | NR Exenatid 10 µg 2-mal täglich | 129              | 8,6                   | -0,9 <sup>a**</sup>      | 95              | -1,6 <sup>a</sup>        |
|                                                                             | Placebo                         | 123              | 8,7                   | +0,1 <sup>a</sup>        | 99              | -0,8 <sup>a</sup>        |
| Add-on zu Metformin + Sulfonylharnstoff (30 Wo)                             | NR Exenatid 5 µg 2-mal täglich  | 245              | 8,5                   | -0,7 <sup>a**</sup>      | 97              | -1,6 <sup>a</sup>        |
|                                                                             | NR Exenatid 10 µg 2-mal täglich | 241              | 8,5                   | -0,9 <sup>a**</sup>      | 98              | -1,6 <sup>a</sup>        |
|                                                                             | Placebo                         | 247              | 8,5                   | +0,1 <sup>a</sup>        | 99              | -0,9 <sup>a</sup>        |
| Add-on zu Insulin glargin ± Metformin und/oder Thiazolidinedion (30 Wo)     | NR Exenatid 10 µg 2-mal täglich | 137              | 8,3                   | -1,7 <sup>a**</sup>      | 95              | -1,8 <sup>a**</sup>      |
|                                                                             | Placebo                         | 122              | 8,5                   | -1,0 <sup>a</sup>        | 94              | +1,0 <sup>a</sup>        |
| Add-on zu Insulin glargin + Metformin (30 Wo)                               | NR Exenatid 10 µg 2-mal täglich | 315              | 8,3                   | -1,1 <sup>a</sup>        | 90              | -2,6 <sup>a</sup>        |
|                                                                             | Insulin lispro                  | 312              | 8,2                   | -1,1 <sup>a</sup>        | 89              | +1,9 <sup>a</sup>        |
| <b>Liraglutid 1,2 oder 1,8 mg einmal täglich</b>                            |                                 |                  |                       |                          |                 |                          |
| Monotherapie (1 Jahr) [6]                                                   | Liraglutid 1,2 mg/Tag           | 251              | 8,2                   | -0,8 <sup>††</sup>       | 92              | -2,05 <sup>†††</sup>     |
|                                                                             | Liraglutid 1,8 mg/Tag           | 246              | 8,2                   | -1,1 <sup>†††</sup>      | 93              | -2,45 <sup>†††</sup>     |
|                                                                             | Glimepirid 8 mg/Tag             | 248              | 8,2                   | -0,5                     | 93              | +1,1                     |
| Add-on zu Metformin (26 Wo) [6]                                             | Liraglutid 1,2 mg/Tag           | 240              | 8,3                   | -1,0 <sup>****††</sup>   | 89              | -2,6 <sup>†††</sup>      |
|                                                                             | Liraglutid 1,8 mg/Tag           | 242              | 8,4                   | -1,0 <sup>****††</sup>   | 88              | -2,8 <sup>†††</sup>      |
|                                                                             | Placebo                         | 121              | 8,4                   | +0,1                     | 91              | -1,5                     |
|                                                                             | Glimepirid 4 mg/Tag             | 242              | 8,4                   | -1,0                     | 89              | +1,0                     |
| Add-on zu Glimepirid (26 Wo) [6]                                            | Liraglutid 1,2 mg/Tag           | 228              | 8,5                   | -1,1 <sup>****††</sup>   | 80              | +0,3 <sup>†††</sup>      |
|                                                                             | Liraglutid 1,8 mg/Tag           | 234              | 8,4                   | -1,1 <sup>****††</sup>   | 83              | -0,2 <sup>†††</sup>      |
|                                                                             | Placebo                         | 114              | 8,4                   | +0,2                     | 82              | -0,1                     |
|                                                                             | Rosiglitazon 4 mg/Tag           | 231              | 8,4                   | -0,4                     | 81              | +2,1                     |
| Add-on zu Metformin + Rosiglitazon (26 Wo) [6]                              | Liraglutid 1,2 mg/Tag           | 177              | 8,5                   | -1,5 <sup>***</sup>      | 95              | -1,0                     |
|                                                                             | Liraglutid 1,8 mg/Tag           | 178              | 8,6                   | -1,5 <sup>***</sup>      | 95              | -2,0                     |
|                                                                             | Placebo                         | 175              | 8,4                   | -0,5                     | 99              | +0,6                     |
| Add-on zu Glimepirid + Metformin (26 Wo) [6]                                | Liraglutid 1,8 mg/Tag           | 230              | 8,3                   | -1,3 <sup>****††</sup>   | 86              | -1,8 <sup>†††</sup>      |
|                                                                             | Placebo                         | 114              | 8,3                   | -0,2                     | 85              | -0,4                     |
|                                                                             | Insulin glargin                 | 232              | 8,1                   | -1,1                     | 85              | +1,6                     |
| Add-on zu Metformin (26 Wo) [7]                                             | Liraglutid 1,2 mg/Tag           | 221              | 8,4                   | -1,2 <sup>a†††</sup>     | 94              | -2,7 <sup>a</sup>        |
|                                                                             | Liraglutid 1,8 mg/Tag           | 218              | 8,4                   | -1,5 <sup>a†††</sup>     | 94              | -3,3 <sup>a</sup>        |
|                                                                             | Sitagliptin 100 mg/Tag          | 219              | 8,5                   | -0,9 <sup>a</sup>        | 94              | -0,8 <sup>a</sup>        |
| Add-on zu Metformin ± Sulfonylharnstoff (26 Wo) [7]                         | Liraglutid 1,8 mg/Tag           | 233              | 8,2                   | -1,1 <sup>a†††</sup>     | n.a.            | ≈ 3                      |
|                                                                             | NR Exenatid 10 µg 2-mal täglich | 231              | 8,1                   | -0,8 <sup>a</sup>        | n.a.            | ≈ 3                      |
| <b>Lixisenatid 20 µg einmal täglich [9]</b>                                 |                                 |                  |                       |                          |                 |                          |
| Add-on zu Metformin (24 Wo)                                                 | Lixisenatid 20 µg/Tag           | 161              | 8,0                   | -0,7 <sup>a***</sup>     | 90              | -2,7 <sup>a**</sup>      |
|                                                                             | Placebo                         | 162              | 8,0                   | -0,3 <sup>a</sup>        | 88              | -1,7 <sup>a</sup>        |
| Add-on zu Metformin (24 Wo)                                                 | Lixisenatid 20 µg/Tag           | 318              | 8,0                   | -0,7 <sup>a</sup>        | 94              | -2,7 <sup>a</sup>        |
|                                                                             | NR Exenatid 10 µg 2-mal täglich | 316              | 8,0                   | -0,9 <sup>a†</sup>       | 96              | -3,7 <sup>a</sup>        |
| Add-on zu Sulfonylharnstoff ± Metformin (24 Wo)                             | Lixisenatid 20 µg/Tag           | 573              | 8,3                   | -0,8 <sup>a***</sup>     | 82              | -1,6 <sup>a**</sup>      |
|                                                                             | Placebo                         | 286              | 8,2                   | -0,2 <sup>a</sup>        | 84              | -0,8 <sup>a</sup>        |
| Add-on zu Pioglitazon ± Metformin (24 Wo)                                   | Lixisenatid 20 µg/Tag           | 323              | 8,1                   | -0,9 <sup>a***</sup>     | 93              | -0,1 <sup>a</sup>        |
|                                                                             | Placebo                         | 161              | 8,1                   | -0,4 <sup>a</sup>        | 97              | +0,3 <sup>a</sup>        |

Tabelle 2 (Fortsetzung)

| Art der Behandlung (Studiendauer)                                                       | Vergleichssubstanzen            | Anzahl Patienten | HbA <sub>1c</sub> (%) |                          | Gewicht (kg)    |                          |
|-----------------------------------------------------------------------------------------|---------------------------------|------------------|-----------------------|--------------------------|-----------------|--------------------------|
|                                                                                         |                                 |                  | BL (Mittelwert)       | mittlere Änderung vs. BL | BL (Mittelwert) | mittlere Änderung vs. BL |
| Add-on zu Basisinsulin ± Metformin (24 Wo)                                              | Lixisenatid 20 µg/Tag           | 329              | 8,4                   | -0,7 <sup>a**</sup>      | 87              | -1,6 <sup>a</sup>        |
|                                                                                         | Placebo                         | 167              | 8,4                   | -0,3 <sup>a</sup>        | 89              | -0,4 <sup>a</sup>        |
| Add-on zu Basisinsulin ± Sulfonylharnstoff (24 Wo)                                      | Lixisenatid 20 µg/Tag           | 154              | 8,5                   | -0,7 <sup>a***</sup>     | 66              | -0,5 <sup>a</sup>        |
|                                                                                         | Placebo                         | 157              | 8,5                   | +0,1 <sup>a</sup>        | 66              | -0,03 <sup>a</sup>       |
| Add-on zu Insulin glargin + Metformin ± Thiazolidinedion (24 Wo)                        | Lixisenatid 20 µg/Tag           | 223              | 7,6                   | -0,7 <sup>a**</sup>      | 87              | +0,3 <sup>a*</sup>       |
|                                                                                         | Placebo                         | 223              | 7,6                   | -0,4 <sup>a</sup>        | 87              | +1,1 <sup>a</sup>        |
| Add-on zu 1–3 oralen blutzuckersenkenden Substanzen (26 Wo)                             | Lixisenatid 20 µg/Tag           | 298              | 7,8                   | -0,6 <sup>a</sup>        | 90              | -0,6 <sup>a††b</sup>     |
|                                                                                         | Insulin glulisin 1-mal täglich  | 298              | 7,7                   | -0,5 <sup>a</sup>        | 88              | +1,0 <sup>a</sup>        |
|                                                                                         | Insulin glulisin 3-mal täglich  | 298              | 7,8                   | -0,8 <sup>a†††</sup>     | 90              | +1,3 <sup>a</sup>        |
| <b>Dulaglutid 0,75 oder 1,5 mg einmal wöchentlich [10]</b>                              |                                 |                  |                       |                          |                 |                          |
| Monotherapie (1 Jahr)                                                                   | Dulaglutid 0,75 mg/Woche        | 270              | 7,6                   | -0,5 <sup>†</sup>        | n.a.            | -1,1                     |
|                                                                                         | Dulaglutid 1,5 mg/Woche         | 269              | 7,6                   | -0,7 <sup>†</sup>        | n.a.            | -1,9                     |
|                                                                                         | Metformin 1,5–2 g/Tag           | 268              | 7,6                   | -0,5                     | n.a.            | -2,2 <sup>‡</sup>        |
| Add-on zu Metformin (2 Jahre)                                                           | Dulaglutid 0,75 mg/Woche        | 302              | 8,2                   | -0,7 <sup>†</sup>        | n.a.            | -2,4                     |
|                                                                                         | Dulaglutid 1,5 mg/Woche         | 304              | 8,1                   | -1,0 <sup>†</sup>        | n.a.            | -2,9 <sup>††</sup>       |
|                                                                                         | Sitagliptin 100 mg/Tag          | 315              | 8,1                   | -0,3                     | n.a.            | -1,7                     |
| Add-on zu Metformin (26 Wo)                                                             | Dulaglutid 1,5 mg/Woche         | 299              | 8,1                   | -1,4                     | n.a.            | -2,9                     |
|                                                                                         | Liraglutid 1,8 mg/Tag           | 300              | 8,1                   | -1,4                     | n.a.            | -3,6 <sup>‡‡</sup>       |
| Add-on zu Metformin + Sulfonylharnstoff (1,5 Jahre)                                     | Dulaglutid 0,75 mg/Woche        | 272              | 8,2                   | -0,6                     | n.a.            | -1,5 <sup>††</sup>       |
|                                                                                         | Dulaglutid 1,5 mg/Woche         | 273              | 8,1                   | -0,9 <sup>†</sup>        | n.a.            | -2,0 <sup>††</sup>       |
|                                                                                         | Insulin glargin                 | 262              | 8,1                   | -0,6                     | n.a.            | +1,3                     |
| Add-on zu Glimepirid (24 Wo)                                                            | Dulaglutid 1,5 mg/Woche         | 239              | 8,4                   | -1,4 <sup>**</sup>       | n.a.            | -0,9                     |
|                                                                                         | Placebo                         | 60               | 8,4                   | -0,1                     | n.a.            | -0,2                     |
| Add-on zu SGLT2I ± Metformin (24 Wo)                                                    | Dulaglutid 0,75 mg/Woche        | 141              | 8,0                   | -1,2 <sup>**</sup>       | n.a.            | -2,6                     |
|                                                                                         | Dulaglutid 1,5 mg/Woche         | 142              | 8,0                   | -1,3 <sup>**</sup>       | n.a.            | -3,1                     |
|                                                                                         | Placebo                         | 140              | 8,0                   | -0,5                     | n.a.            | -2,3                     |
| Add-on zu Metformin + Pioglitazon (1 Jahr)                                              | Dulaglutid 0,75 mg/Woche        | 280              | 8,1                   | -1,1 <sup>†</sup>        | n.a.            | +0,4                     |
|                                                                                         | Dulaglutid 1,5 mg/Woche         | 279              | 8,1                   | -1,4 <sup>†</sup>        | n.a.            | -1,1                     |
|                                                                                         | NR Exenatid 10 µg 2-mal täglich | 276              | 8,1                   | -0,8                     | n.a.            | -0,8 <sup>‡</sup>        |
| Ersatz für vorherige Insulin-Therapie (1 Jahr)                                          | Dulaglutid 0,75 mg/Woche        | 293              | 8,4                   | -1,4 <sup>†</sup>        | n.a.            | +0,9 <sup>††</sup>       |
|                                                                                         | Dulaglutid 1,5 mg/Woche         | 295              | 8,5                   | -1,5 <sup>†</sup>        | n.a.            | -0,4 <sup>††</sup>       |
|                                                                                         | Insulin glargin                 | 296              | 8,5                   | -1,2                     | n.a.            | +2,9                     |
| <b>retardiertes (ret.) Exenatid 2 mg einmal wöchentlich</b>                             |                                 |                  |                       |                          |                 |                          |
| Monotherapie oder Add-on zu 1 oder 2 oralen blutzuckersenkenden Substanzen (24 Wo) [12] | ret. Exenatid 2 mg/Woche        | 129              | 8,5                   | -1,6 <sup>†††</sup>      | 97              | -2,3                     |
|                                                                                         | NR Exenatid 10 µg 2-mal täglich | 123              | 8,4                   | -0,9                     | 94              | -1,4                     |
| Monotherapie oder Add-on zu 1 oder 2 oralen blutzuckersenkenden Substanzen (30 Wo) [12] | ret. Exenatid 2 mg/Woche        | 148              | 8,3                   | -1,9 <sup>†</sup>        | 102             | -3,7                     |
|                                                                                         | NR Exenatid 10 µg 2-mal täglich | 147              | 8,3                   | -1,5                     | 102             | -3,6                     |
| Add-on zu Metformin (26 Wo) [12]                                                        | ret. Exenatid 2 mg/Woche        | 160              | 8,6                   | -1,6 <sup>†c</sup>       | 89              | -2,3 <sup>†d</sup>       |
|                                                                                         | Sitagliptin 100 mg/Tag          | 166              | 8,5                   | -0,9                     | 87              | -0,8                     |
|                                                                                         | Pioglitazon 45 mg/Tag           | 165              | 8,5                   | -1,2                     | 86              | +2,8                     |
| Add-on zu Metformin ± Sulfonylharnstoff (26 Wo) [12]                                    | ret. Exenatid 2 mg/Woche        | 233              | 8,3                   | -1,5 <sup>†</sup>        | 91              | -2,6 <sup>†</sup>        |
|                                                                                         | Insulin glargin                 | 223              | 8,3                   | -1,3                     | 91              | +1,4                     |
| Add-on zu Insulin glargin ± Metformin (28 Wo; 458) [12]                                 | ret. Exenatid 2 mg/Woche        | 230              | 8,5                   | -1,0 <sup>**</sup>       | 94              | -1,0 <sup>**</sup>       |
|                                                                                         | Placebo                         | 228              | 8,5                   | -0,2                     | n.a.            | +0,5                     |
| Add-on zu 1 oder 2 oralen blutzuckersenkenden Substanzen (26 Wo; 911) [13]              | ret. Exenatid 2 mg/Woche        | 461              | 8,5                   | -1,3 <sup>a</sup>        | n.a.            | -2,7 <sup>a</sup>        |
|                                                                                         | Liraglutid 1,8 mg/Tag           | 450              | 8,4                   | -1,5 <sup>a</sup>        | n.a.            | -3,6 <sup>a</sup>        |

Tabelle 2 (Fortsetzung)

| Art der Behandlung (Studiendauer)                            | Vergleichssubstanzen     | Anzahl Patienten | HbA <sub>1c</sub> (%) |                          | Gewicht (kg)    |                          |
|--------------------------------------------------------------|--------------------------|------------------|-----------------------|--------------------------|-----------------|--------------------------|
|                                                              |                          |                  | BL (Mittelwert)       | mittlere Änderung vs. BL | BL (Mittelwert) | mittlere Änderung vs. BL |
| <b>Semaglutid 0,5 oder 1,0 mg einmal wöchentlich [15]</b>    |                          |                  |                       |                          |                 |                          |
| Monotherapie (30 Wo)                                         | Semaglutid 0,5 mg/Woche  | 128              | 8,1                   | -1,5***                  | 90              | -3,7***                  |
|                                                              | Semaglutid 1,0 mg/Woche  | 130              | 8,1                   | -1,6***                  | 97              | -4,5***                  |
|                                                              | Placebo                  | 129              | 8,0                   | 0                        | 90              | -1,0                     |
| Add-on zu Basalinsulin ± Metformin (30 Wo)                   | Semaglutid 0,5 mg/Woche  | 132              | 8,4                   | -1,4***                  | 93              | -3,7***                  |
|                                                              | Semaglutid 1,0 mg/Woche  | 131              | 8,3                   | -1,8***                  | 93              | -6,4***                  |
|                                                              | Placebo                  | 133              | 8,4                   | -0,1                     | 90              | -1,4                     |
| Add-on zu Metformin und/oder Thiazolidinedion (56 Wo)        | Semaglutid 0,5 mg/Woche  | 409              | 8,0                   | -1,3†††                  | 90              | -4,3†††                  |
|                                                              | Semaglutid 1,0 mg/Woche  | 409              | 8,0                   | -1,6†††                  | 89              | -6,1†††                  |
|                                                              | Sitagliptin 100 mg/Tag   | 407              | 8,2                   | -0,5                     | 89              | -1,4                     |
| Add-on zu Metformin ± Sulfonylharnstoff oder anderes (56 Wo) | Semaglutid 1,0 mg/Woche  | 404              | 8,4                   | -1,5†††                  | 96              | -5,6†††                  |
|                                                              | ret. Exenatid            | 405              | 8,3                   | -0,9                     | 95              | -1,9                     |
| Add-on zu Metformin ± Sulfonylharnstoff (30 Wo)              | Semaglutid 0,5 mg/Woche  | 362              | 8,1                   | -1,2†††                  | 94              | -3,5†††                  |
|                                                              | Semaglutid 1,0 mg/Woche  | 360              | 8,2                   | -1,6†††                  | 94              | -5,2†††                  |
|                                                              | Insulin glargin          | 360              | 8,1                   | -0,8                     | 93              | +1,2                     |
| Add-on zu Metformin (40 Wo)                                  | Semaglutid 0,5 mg/Woche  | 301              | 8,3                   | -1,5†††                  | 96              | -4,6†††                  |
|                                                              | Dulaglutid 0,75 mg/Woche | 299              | 8,2                   | -1,1                     | 96              | -2,3                     |
| Add-on zu Metformin (40 Wo)                                  | Semaglutid 1,0 mg/Woche  | 300              | 8,2                   | -1,8†††                  | 96              | -6,5†††                  |
|                                                              | Dulaglutid 1,5 mg/Woche  | 299              | 8,2                   | -1,4                     | 93              | -3,0                     |

Um Konsistenz bei den Daten für die verschiedenen GLP-1RA zu erreichen, handelt es sich bei den angegebenen Daten um die Ergebnisse für die Intention-to-treat-Population in randomisierten, kontrollierten Studien mit > 250 Patienten und einer Dauer von ≥ 24 Wochen, die in der europäischen Zusammenfassung der Merkmale des Arzneimittels (EU-SmPC) [6, 10, 12, 15] und/oder der US-amerikanischen Prescribing Information [5, 7, 9, 13] angegeben sind (auf Grundlage der Vollständigkeit der angegebenen Daten). Es sind nur Studien aufgeführt, in denen zugelassene Dosen eines GLP-1RA als Monotherapie oder als einzige Add-on-Therapie zu einer laufenden Therapie (+ Diät/körperliche Aktivität) untersucht wurden und für die statistische Daten bezüglich der Baseline-Werte und der Änderung gegenüber den Baseline-Werten für den HbA<sub>1c</sub>-Wert genannt wurden. Die GLP-1RA und die optimierten Insulin-Dosen wurden subkutan verabreicht; sonstige aktive Vergleichssubstanzen wurden oral verabreicht.

BL Baseline; HbA<sub>1c</sub> glykosyliertes Hämoglobin; n.a. nicht angegeben; NR schnell freigesetzt (nicht-retardiert); ret. retardiert; SGLT2I Natrium-Glucose-Cotransporter-2-Inhibitor; Wo Woche(n)

\* $p < 0,05$ ; \*\* $p < 0,01$ ; \*\*\* $p < 0,0001$  für GLP-1RA vs. Placebo

† $p < 0,05$ ; †† $p < 0,01$ ; ††† $p < 0,0001$  für GLP-1RA vs. aktive Vergleichssubstanz

‡ $p < 0,05$  vs. Dulaglutid 0,75 mg/Woche; †† $p < 0,05$  vs. Dulaglutid 1,5 mg/Woche; ††† $p = 0,0002$  vs. Lixisenatid 20 µg/Tag

<sup>a</sup>Kleinste-Quadrate-Mittelwert

<sup>b</sup>versus Insulin glulisin 3-mal täglich

<sup>c</sup> $p < 0,0001$  für retardiertes Exenatid vs. Sitagliptin und  $p < 0,05$  für retardiertes Exenatid vs. Pioglitazon

<sup>d</sup> $p < 0,05$  für retardiertes Exenatid vs. Sitagliptin und  $p < 0,0001$  für retardiertes Exenatid vs. Pioglitazon

direkten Vergleichsstudien gegenüber den beiden anderen aktuell erhältlichen GLP-1RA mit einmal wöchentlich Verabreichung gezeigt wurde, wären aktualisierte Metaanalysen von Interesse, die auch Daten zu Semaglutid einschließen.

Bei zusätzlicher Verabreichung zu oralen blutzuckersenkenden Wirkstoffen fiel die Gewichtsreduktion unter einmal wöchentlich Semaglutid mehr als doppelt so ausgeprägt ( $p < 0,0001$ ) aus wie unter einmal wöchentlich retardiertem

Exenatid oder einmal wöchentlich Dulaglutid (Tabelle 2). Unter einmal täglich 1,8 mg Liraglutid wurde eine vergleichbare Gewichtsreduktion erzielt wie unter zweimal täglich 10 µg schnell freigesetztem Exenatid bzw. eine signifikant ausgeprägtere Gewichtsreduktion als unter 1,5 mg/Woche Dulaglutid (Tabelle 2). Diese Daten aus klinischen Studien werden durch Real-World-Evidenz unterstützt [24]. In einer retrospektiven Kohorten-Studie zu 2.465 Patienten, die mit einmal wöchentlich Exenatid, Dulaglutid oder

Albiglutid behandelt wurden, betrug die mittlere Reduktion des  $\text{HbA}_{1c}$ -Werts (gegenüber dem Ausgangswert) nach 6 Monaten insgesamt 0,5 % und es wurde keine signifikante Differenz zwischen den Behandlungsgruppen beobachtet [24]. Dagegen fiel die Gewichtsreduktion unter Dulaglutid signifikant ausgeprägter aus als unter Exenatid und Albiglutid (2,7 vs. 1,4 bzw. 1,6 kg;  $p = 0,001$ ) [24].

#### 4 Auswirkungen von einmal wöchentlich verabreichten GLP-1RA auf Patient-Reported Outcomes

Einmal wöchentlich verabreichte GLP-1RA verbesserten die meisten für die Behandlung des Typ-2-Diabetes relevanten Patient-Reported-Outcomes (PRO) gegenüber der Situation vor der Behandlung. In einigen RCT-Studien wurden außerdem signifikante Verbesserungen gegenüber Placebo oder aktiven Vergleichssubstanzen beobachtet (Tabelle 3) [25–32]. Aufgrund von Unterschieden im Studiendesign (z. B. Vergleichssubstanzen, PRO-Instrumente, Einschlusskriterien und Studiendauer) variieren die Ergebnisse zwischen den verschiedenen RCT-Studien üblicherweise.

Insgesamt weisen die aktuell verfügbaren Daten darauf hin, dass eine Behandlung mit einem einmal wöchentlich verabreichten GLP-1RA das Ergebnis des Diabetes Treatment Satisfaction Questionnaire (DTSQ) sowie die Punktwerte für die Zufriedenheit mit der Diabetestherapie und die subjektive Wahrnehmung der Patienten bezüglich der Häufigkeit von Überzuckerungen signifikant ausgeprägter verbessern kann als Placebo (Tabelle 3) [25–32]. In einigen wenigen RCT-Studien wurden auch gegenüber bestimmten anderen blutzuckersenkenden Wirkstoffen signifikante Verbesserungen beobachtet (am häufigsten Semaglutid vs. Sitagliptin oder Insulin glargin [28–32]) (Tabelle 3). Mit wenigen Ausnahmen erzielten einmal wöchentlich verabreichte GLP-1RA keine signifikant ausgeprägtere Verbesserung der subjektiven Wahrnehmung der DTSQ-Patienten bezüglich der Häufigkeit von Unterzuckerungen und der körperligen bezogenen PRO-Instrumente als Placebo oder andere blutzuckersenkende Substanzen (Tabelle 3). In direkten Vergleichsstudien zu GLP-1RA war die Verbesserung der Punktwerte bei einigen DTSQ-Komponenten unter einmal wöchentlich Dulaglutid oder retardiertem Exenatid ausgeprägter als unter schnell freigesetztem Exenatid [25, 26] und unter Semaglutid ausgeprägter als unter retardiertem Exenatid [31] (Tabelle 3).

In mehreren RCT-Studien wurde die allgemeine gesundheitsbezogene Lebensqualität untersucht. Dabei wurden unter einmal wöchentlich verabreichten GLP-1RA bei den meisten die gesundheitsbezogene Lebensqualität betreffenden PRO-Instrumenten wie dem „EuroQol-5-Dimensionen-Fragebogen“, dem „Psychological General Well-Being

Index“ und dem Gesamtscore und/oder Domänenscores des „Short-Form-36(SF-36)-Gesundheitsfragebogens“ einheitlich signifikante Verbesserungen gegenüber dem Ausgangszustand beobachtet [25, 27, 29, 30, 32]. Allerdings erzielten einmal wöchentlich verabreichte GLP-1RA mit wenigen Ausnahmen nicht durchgehend eine signifikant ausgeprägtere Verbesserung dieser Endpunkte als Placebo oder aktive Vergleichssubstanzen [25, 27, 29, 30, 32].

Dennoch können sich die Ergebnisse in PRO-Instrumenten, die die allgemeine gesundheitsbezogene Lebensqualität abbilden oder für den Typ-2-Diabetes relevant sind, im Zusammenhang mit einer signifikanten Gewichtsreduktion verbessern, wie unter Semaglutid beobachtet wurde [33]. In einer gepoolten Analyse von PRO-Daten von 2.808 mit Semaglutid 0,5 mg oder 1,0 mg/Woche behandelten Patienten zeigten Patienten mit einer Gewichtsreduktion um  $\geq 5\%$  oder  $\geq 10\%$  signifikant ( $p < 0,01$ ) ausgeprägtere Verbesserungen im körperlichen Summenscore sowie im Score für die allgemeine Gesundheitswahrnehmung und die körperliche Funktionsfähigkeit des SF-36 (Version 2) als Patienten ohne entsprechende Gewichtsreduktion [33]. Auch die Punktwerte auf den DTSQ-Skalen zur allgemeinen Zufriedenheit mit der Diabetestherapie und zur subjektiv wahrgenommenen Häufigkeit von Überzuckerungen waren bei Patienten mit einer Gewichtsreduktion von  $\geq 5\%$  oder  $\geq 10\%$  signifikant ( $p < 0,01$ ) ausgeprägter als bei Patienten ohne derartige Gewichtsreduktion [33].

Die Adhärenz kann bei einmal wöchentlicher Anwendung von GLP-1RA gegebenenfalls besser sein als bei einmal oder zweimal täglicher Anwendung, was das Behandlungsergebnis verbessern kann [34]. In retrospektiven Studien an Real-World-Daten war die Adhärenz über den Zeitraum von 6 Monaten unter einmal wöchentlich retardiertem Exenatid signifikant besser als unter zweimal täglich schnell freigesetztem Exenatid [35, 36] und/oder einmal täglich Liraglutid [35–37] und die Adhärenz sowie die Persistenz-Raten waren unter einmal wöchentlich Dulaglutid signifikant höher und Abbruchraten signifikant niedriger als unter einmal täglich Liraglutid und einmal wöchentlich Exenatid [38].

#### 5 Auswirkungen von GLP-1RA auf schwere kardiovaskuläre Ereignisse

Da Patienten mit T2D ein erhöhtes Risiko für unerwünschte kardiovaskuläre Ereignisse haben, wird durch die aktuelle Behandlung des Typ-2-Diabetes auch eine Reduktion von kardiovaskulären Risikofaktoren, wie unter anderem Hyperglykämien, angestrebt [39, 40]. GLP-1RA als Klasse wirken sich positiv auf mehrere kardiovaskuläre Risikofaktoren aus, indem sie die Blutzuckerkontrolle verbessern und eine Gewichtsreduktion begünstigen



**Tabelle 3** Zusammenfassung der Ergebnisse bei für den Typ-2-Diabetes relevanten Patient-Reported Outcomes in randomisierten, kontrollierten Phase-III-Studien mit einmal wöchentlichem Anwendung eines Glucagon-like-Peptid-1-Rezeptoragonisten (GLP-1-IRA)

| Patient-Reported Outcome                                                  | Dulaglutid 0,75 oder 1,5 mg/Woche [25]                                                                                                                                                         | retardiertes Exenatid 2 mg/Woche [26, 27]                                                                                                          | Semaglutid 0,5 oder 1,0 mg/Woche [28–32]                                                                                                                                                                   |
|---------------------------------------------------------------------------|------------------------------------------------------------------------------------------------------------------------------------------------------------------------------------------------|----------------------------------------------------------------------------------------------------------------------------------------------------|------------------------------------------------------------------------------------------------------------------------------------------------------------------------------------------------------------|
| <b>Punktwerte im Diabetes Treatment Satisfaction Questionnaire (DTSQ)</b> |                                                                                                                                                                                                |                                                                                                                                                    |                                                                                                                                                                                                            |
| Gesamtscore                                                               | $p < 0,05$ vs. Placebo und schnell freigesetztes Exenatid (26 Wo)<br><br>n.s. vs. Metformin und Liraglutid (26 Wo)                                                                             | n.s. vs. schnell freigesetztes Exenatid (30 und 52 Wo) und Sitagliptin und Pioglitazon (26 Wo)                                                     | $p < 0,05$ vs. Placebo und Insulin glargin (30 Wo) und Sitagliptin oder retardiertes Exenatid (56 Wo)<br><br>1,0 mg/Woche: $p < 0,01$ vs. retardiertes Exenatid (56 Wo)<br><br>n.s. vs. Dulaglutid (40 Wo) |
| Zufriedenheit mit der aktuellen Diabetestherapie                          |                                                                                                                                                                                                | n.s. vs. schnell freigesetztes Exenatid (30 und 52 Wo) und Sitagliptin und Pioglitazon (26 Wo)                                                     | $p < 0,05$ vs. Sitagliptin (56 Wo)<br><br>n.s. vs. Insulin glargin (30 Wo) und Dulaglutid (40 Wo)                                                                                                          |
| subjektiv wahrgenommene Häufigkeit von Überzuckerungen                    | $p < 0,05$ vs. Placebo und schnell freigesetztes Exenatid (26 Wo)<br><br>1,5 mg/Woche: $p < 0,05$ vs. Metformin (26 Wo)                                                                        | $p < 0,05$ vs. schnell freigesetztes Exenatid (30 und 52 Wo)                                                                                       | $p < 0,05$ vs. Insulin glargin (30 Wo), Dulaglutid (40 Wo) und Sitagliptin (56 Wo)                                                                                                                         |
| subjektiv wahrgenommene Häufigkeit von Unterzuckerungen                   | $p < 0,05$ vs. schnell freigesetztes Exenatid (26 Wo)<br><br>n.s. vs. Placebo und Metformin (26 Wo)                                                                                            | n.s. vs. Sitagliptin und Pioglitazon (26 Wo)<br><br>n.s. vs. schnell freigesetztes Exenatid (30 und 52 Wo) und Sitagliptin und Pioglitazon (26 Wo) | n.s. vs. Insulin glargin (30 Wo), Dulaglutid (40 Wo) und Sitagliptin (56 Wo)                                                                                                                               |
| <b>Punktwerte auf das Körpergewicht betreffenden Skalen</b>               |                                                                                                                                                                                                |                                                                                                                                                    |                                                                                                                                                                                                            |
| Impact of Weight on Self-Perception                                       | n.s. vs. Placebo, Metformin, schnell freigesetztes Exenatid und Liraglutid (26 Wo) und Insulin glargin (52 Wo)<br><br>1,5 mg/Woche: $p < 0,05$ vs. Placebo (28 Wo) und Insulin glargin (26 Wo) |                                                                                                                                                    |                                                                                                                                                                                                            |
| Impact of Weight on Quality of Life-Lite                                  | n.s. vs. Sitagliptin (52 Wo)                                                                                                                                                                   | $p < 0,05$ vs. Pioglitazon (26 Wo)<br><br>n.s. vs. schnell freigesetztes Exenatid (30 und 52 Wo) und Sitagliptin (26 Wo)                           |                                                                                                                                                                                                            |

Die RCT-Studien hatten eine Dauer von 26–56 Wochen [25–32]. Die GLP-1-IRA und Vergleichssubstanzen wurden einer Behandlung mit 1–3 blutzuckersenkenden Wirkstoffen hinzugefügt, außer beim Vergleich von Dulaglutid mit Metformin als Monotherapie in einer RCT-Studie [25]. Es sind nur Ergebnisse für den Gesamtscore und Punktwerte auf wichtigen Subskalen von für den Typ-2-Diabetes relevanten PRO-Instrumenten angegeben, die in mehr als einer RCT-Studie eingesetzt wurden. Sofern nicht anders angegeben betreffen die Ergebnisse bei Dulaglutid und Semaglutid jeweils beide Dosen. Die aktiven Vergleichssubstanzen wurden in einer täglichen Dosis von 1,5–2 g bei Metformin, 45 mg bei Pioglitazon, 100 mg bei Sitagliptin und 1,8 mg bei Liraglutid verabreicht.

n.s. keine signifikante Differenz zwischen GLP-1-IRA und Vergleichssubstanz; RCT randomisierte kontrollierte Studie; Wo Woche(n)

(Abschnitt 3), aber auch durch eine Verbesserung von Faktoren, die unabhängig von Veränderungen des Blutzuckerspiegels sind [39–42].

In RCT-Studien, in denen schwere unerwünschte kardiovaskuläre Ereignisse (MACE-Ereignisse) bei Patienten mit T2D untersucht wurden, war die Inzidenz von MACE-Ereignissen unter einer Behandlung mit einmal täglich oder wöchentlich verabreichten GLP-1RA im Vergleich zu einer Behandlung mit Placebo entweder signifikant reduziert (Liraglutid [43], Dulaglutid [44] und Semaglutid [45]) oder zumindest nicht erhöht (Lixisenatid [46] und retardiertes Exenatid [47]). Dabei bewegten sich die Hazard-Ratios im Bereich von 0,74 bis 1,02 (Tabelle 4). Die Reduktion der MACE-Inzidenz schien im Fall von Liraglutid primär auf einer Reduktion der MACE-Komponente kardiovaskuläre Todesfälle [43] und unter Dulaglutid [44] und Semaglutid [45] auf einer Reduktion von nicht-tödlichen Schlaganfällen zu beruhen. Weitere signifikante Unterschiede im Risiko für individuelle MACE-Komponenten zwischen individuellen GLP-1RA und Placebo wurden nicht beobachtet (Tabelle 4). Das Gesamtmortalitätsrisiko war unter Liraglutid und retardiertem Exenatid signifikant niedriger als unter Placebo (Tabelle 4).

Diskrepanzen zwischen den Studien lassen sich durch Faktoren wie Heterogenität der RCT-Studien, Definitionen von kombinierten und individuellen Endpunkten und Pharmakokinetik der GLP-1RA erklären, und dadurch wie sich die einzelnen GLP-1RA auf veränderbare kardiovaskuläre Risikofaktoren auswirken [39–42, 44]. Eine Metaanalyse, die RCT-Studien zu Lixisenatid, Liraglutid, retardiertem Exenatid und Semaglutid berücksichtigte, in denen kardiovaskuläre Endpunkte untersucht wurden, ergab, dass diese GLP-1RA im Vergleich zu Placebo insgesamt eine signifikante Reduktion des Risikos für MACE-Ereignisse um 10 %, der kardiovaskulären Mortalität um 13 % und der Gesamtmortalität um 12 % bewirkten [48].

## 6 Verträglichkeitsprofile von GLP-1RA

GLP-1RA werden insgesamt gut vertragen. Die häufigsten unerwünschten Arzneimittelwirkungen (UAW; Tabelle 5) sind gastrointestinaler Art [19, 49–51]. Da die Wirkung von GLP-1RA vom Blutzuckerspiegel abhängig ist, haben die Wirkstoffe kein intrinsisches Hypoglykämie-Risiko. In RCT-Studien waren GLP-1RA bei Anwendung als Monotherapie oder in Kombination mit anderen blutzuckersenkenden Wirkstoffen mit sehr niedrigen Raten von schweren Hypoglykämien verbunden [4–16]. Allerdings muss, wenn dem bestehenden Regime ein GLP-1RA hinzugefügt wird, gegebenenfalls die Dosis von Insulin oder Insulin-Sekretagoga reduziert werden, um das Potential für Hypoglykämie-Episoden zu reduzieren [4–16].

Auch wenn es sich bei vielen UAW um Klasseneffekte zu handeln scheint, wird das Verträglichkeitsprofil der einzelnen GLP-1RA in Bezug auf einige UAW durch Unterschiede in Struktur und Wirkdauer der verschiedenen Wirkstoffe beeinflusst. Dies gilt insbesondere für gastrointestinale UAW und Reaktionen an der Injektionsstelle (Tabelle 5) [19, 49, 50].

In randomisierten, kontrollierten direkten Vergleichsstudien wurden nur beim Vergleich von Liraglutid mit retardiertem Exenatid [65] und von schnell freigesetztem Exenatid mit Dulaglutid 0,75 (aber nicht 1,5) mg pro Woche [53] signifikante Unterschiede bei den Raten von gastrointestinalen UAW beobachtet. Eine Metaanalyse fand keine signifikanten Differenzen bei den Raten von Übelkeit und UAW-bedingten Behandlungsabbrüchen zwischen retardiertem Exenatid und Dulaglutid, schnell freigesetztem Exenatid, Liraglutid und Lixisenatid, wenn diese als Add-on-Therapie zu Metformin verabreicht wurden [66]. Eine weitere Metaanalyse ergab, dass einmal wöchentlich verabreichte GLP-1RA (die Analyse berücksichtigte keine Daten zu Semaglutid) mit einem vergleichbaren Risiko für Diarrhö verbunden waren, während das Risiko für Übelkeit unter Dulaglutid höher war als unter retardiertem Exenatid [23]. In einer randomisierten, kontrollierten direkten Vergleichsstudie war die Rate von Übelkeit unter Semaglutid 1,0 mg/Woche höher als unter Dulaglutid 1,5 mg/Woche (83,2 vs. 45,4/100 Patientenjahre), während die Gesamtrate aller gastrointestinalen UAW vergleichbar war (43 vs. 44 % der Patienten) [32].

Die relative Inzidenz von Reaktionen an der Injektionsstelle bei Anwendung der GLP-1RA ist schwer zu bestimmen, da Häufigkeit und Merkmale derartiger Reaktionen in RCT-Studien nicht einheitlich beschrieben wurden und keine statistische Analyse erfolgte [19, 51]. In randomisierten, kontrollierten direkten Vergleichsstudien war die Rate von Reaktionen an der Injektionsstelle bei Patienten, die retardiertes Exenatid erhielten, höher als bei Patienten, die schnell freigesetztes Exenatid erhielten [12–14], und mit Semaglutid behandelte Patienten hatten niedrigere Raten von Reaktionen an der Injektionsstelle als mit retardiertem Exenatid behandelte Patienten [31]. Unter Dulaglutid und Liraglutid [67] sowie unter Dulaglutid und Semaglutid [32] wurden vergleichbare Raten von Reaktionen an der Injektionsstelle beobachtet.

Mit einigen Ausnahmen sind bei Patienten mit eingeschränkter Leberfunktion oder leicht eingeschränkter Nierenfunktion im Allgemeinen keine Dosisanpassungen erforderlich (Tabelle 6). Da nur begrenzt Daten vorliegen, ist jedoch bei Anwendung von GLP-1RA bei Patienten mit schwererer Beeinträchtigung der Nierenfunktion Vorsicht geboten bzw. eine solche Anwendung wird nicht empfohlen (Tabelle 6). Dosisanpassungen auf Grundlage des Faktors Alter sind nicht erforderlich (begrenzte Daten bei Patienten

**Tabelle 4** Ergebnisse von randomisierten, placebokontrollierten Studien, in denen die Wirkung von Glucagon-like-Peptid-1-Rezeptoragonisten (GLP-1RA) auf wichtige unerwünschte kardiovaskuläre Ereignisse (MACE) untersucht wurde

|                                                                          | GLP-1RA mit einmal täglicher Anwendung  |                                                     | GLP-1RA mit einmal wöchentlicher Anwendung              |                                                  |                                             |
|--------------------------------------------------------------------------|-----------------------------------------|-----------------------------------------------------|---------------------------------------------------------|--------------------------------------------------|---------------------------------------------|
|                                                                          | Liraglutid 1,8 mg/Tag vs. PL [6, 7, 43] | Lixisenatid 20 µg/Tag vs. PL [8, 9, 46]             | Dulaglutid 1,5 mg/Woche vs. PL [44]                     | retardiertes Exenatid 2 mg/Woche vs. PL [12, 47] | Semaglutid 0,5/1,0 mg/Woche vs. PL [15, 45] |
| <b>Studiendesign</b>                                                     |                                         |                                                     |                                                         |                                                  |                                             |
| Anzahl der Patienten                                                     | 9.340                                   | 6.068                                               | 9.901                                                   | 14.752                                           | 3.297                                       |
| Diabetes-Therapie, zu der der GLP-1RA hinzugefügt wurde                  | Standardbehandlung                      | Standardbehandlung (nach wenig zurückliegendem AKS) | 1–2 orale Antidiabetika ± Basalinsulin                  | Standardbehandlung                               | Standardbehandlung                          |
| Behandlungsdauer                                                         | Median: 3,5 Jahre                       | Median: 22,4 vs. 23,3 Monate                        | 82 vs. 83 % der Zeit bis zu MACE/ Nachbeobachtungsdauer | Median: 27,8 Monate                              | 2 Jahre                                     |
| Dauer der Nachbeobachtung                                                | 3,5–5 Jahre                             | Median: 25,8 vs. 23,3 Monate                        | Median: 5,4 Jahre                                       | Median: 38,7 Monate                              |                                             |
| <b>MACE und MACE-Komponenten</b>                                         |                                         |                                                     |                                                         |                                                  |                                             |
| kombinierter Endpunkt <sup>a</sup> [% der Pat. (HR; 95%-KI)]             | <b>13,0 vs. 14,9 (0,87; 0,78–0,97)</b>  | 13,4 vs. 13,2 (1,02; 0,89–1,17)                     | <b>12,0 vs. 13,4 (0,88; 0,79–0,99)</b>                  | 11,4 vs. 12,2 (0,91; 0,83–1,00)                  | <b>6,6 vs. 8,9 (0,74; 0,58–0,95)</b>        |
| kardiovaskuläre Todesfälle [% der Pat. (HR; 95%-KI)]                     | <b>4,7 vs. 6,0 (0,78; 0,66–0,93)</b>    | 5,1 vs. 5,2 (0,98; 0,78–1,22)                       | 6,4 vs. 7,0 (0,91; 0,78–1,06) <sup>b</sup>              | 4,6 vs. 5,2 (0,88; 0,76–1,02)                    | 2,7 vs. 2,8 (0,98; 0,65–1,48)               |
| nicht-tödliche Schlaganfälle [% der Pat. (HR; 95%-KI)]                   | 3,4 vs. 3,8 (0,89; 0,72–1,11)           | 2,2 vs. 2,0 (1,12; 0,79–1,58)                       | <b>2,7 vs. 3,5 (0,76; 0,61–0,95)</b>                    | 2,5 vs. 2,9 (0,85; 0,70–1,03)                    | <b>1,6 vs. 2,7 (0,61; 0,38–0,99)</b>        |
| nicht-tödliche Myokardinfarkte [% der Pat. (HR; 95%-KI)]                 | 6,0 vs. 6,8 (0,88; 0,75–1,03)           | 8,9 vs. 8,6 (1,03; 0,87–1,23)                       | 4,1 vs. 4,3 (0,96; 0,79–1,16)                           | 6,6 vs. 6,7 (0,97; 0,85–1,10)                    | 2,9 vs. 3,9 (0,74; 0,51–1,08)               |
| stationärer Aufenthalt wegen instabiler Angina [% der Pat. (HR; 95%-KI)] |                                         | 0,4 vs. 0,3 (1,11; 0,47–2,62)                       |                                                         |                                                  |                                             |
| <b>weitere sekundäre Endpunkte</b>                                       |                                         |                                                     |                                                         |                                                  |                                             |
| Gesamtmortalität [% der Pat. (HR; 95%-KI)]                               | <b>8,2 vs. 9,6 (0,85; 0,74–0,97)</b>    |                                                     | 10,8 vs. 12,0 (0,90; 0,80–1,01)                         | <b>6,9 vs. 7,9 (0,86; 0,77–0,97)</b>             | 3,8 vs. 3,6 (1,05; 0,74–1,50)               |

Die Ergebnisse beziehen sich auf das Full-Analysis-Set (Liraglutid, Dulaglutid und Semaglutid) bzw. die Intention-to-treat-Population (retardiertes Exenatid und Lixisenatid). Fettgedruckte Werte zeigen eine signifikante Differenz zwischen den Behandlungsgruppen zugunsten von GLP-1RA versus PL an.

AKS akutes Koronarsyndrom, HR Hazard-Ratio; PL Placebo; Pat. Patienten

<sup>a</sup>Der primäre Endpunkt bezieht sich auf die Zeit von der Randomisierung bis zum ersten Auftreten einer MACE-Komponente.

<sup>b</sup>beinhaltet auch Todesfälle ungeklärter Ursache

≥ 70 oder 75 Jahren), allerdings ist bei der Behandlung älterer Patienten eine eventuelle altersbedingte Einschränkung der Nierenfunktion zu beachten. Schwangere und stillende Frauen sollten keine GLP-1RA anwenden. Bei Patienten mit erhöhtem Risiko für eine akute Nierenerkrankung, Pankreatitis oder Schilddrüsenerkrankung sind Vorsichtsmaßnahmen zu treffen (Tabelle 5).

## 7 Zugelassene Anwendungsgebiete von GLP-1RA

Es gibt sechs GLP-1RA-Formulierungen (d. h. zweimal täglich schnell freigesetztes Exenatid, einmal täglich Liraglutid und Lixisenatid und einmal wöchentlich Dulaglutid, retardiertes Exenatid und Semaglutid), die in der EU und/

This material is copyright of the original publisher. Unauthorised copying and distribution is prohibited.

**Tabelle 5** Übersicht über das allgemeine Verträglichkeitsprofil von Glucagon-like-Peptid-1-Rezeptoragonisten (GLP-1RA)

|                                          |                                                                                                                                                                                                                                                                                                                                                                                                                                                                                                                                                                                                                                                                                                                                                                                                                                                             |
|------------------------------------------|-------------------------------------------------------------------------------------------------------------------------------------------------------------------------------------------------------------------------------------------------------------------------------------------------------------------------------------------------------------------------------------------------------------------------------------------------------------------------------------------------------------------------------------------------------------------------------------------------------------------------------------------------------------------------------------------------------------------------------------------------------------------------------------------------------------------------------------------------------------|
| Wirkungen auf den Gastrointestinaltrakt  | häufigste Art von UAW; meist zu Beginn der Behandlung, dann nach und nach ↓ [19, 50–52]<br>Anwendung bei Patienten mit entzündlicher Darmerkrankung oder diabetischer Gastroparese nicht empfohlen [4–16]<br>Übelkeit: sehr häufig <sup>a</sup> (bei bis zu 50 % der Patienten beschrieben); im Allgemeinen leicht bis mittelschwer ausgeprägt und dosisabhängig [49]<br>kurzwirksame GLP-1RA <sup>b</sup> : ↑ Risiko wegen deutlicher Verzögerung der Magenentleerung: ↓ langsam über mehrere Monate; kann zu Behandlungsabbruch führen (langwirksame GLP-1RA verzögern die Magenentleerung nicht; Übelkeit klingt schnell ab) [19, 49, 52]<br>andere häufige <sup>a</sup> Ereignisse: Dyspepsie, Obstipation, Abdominalschmerz [52]; Erbrechen ist unter Dulaglutid häufiger als unter schnell freigesetztem Exenatid [53]                                |
| kardiovaskuläre Wirkungen                | kein signifikanter ↑ des Risikos für kardiovaskuläre Wirkungen (Abschnitt 5) [44, 48, 54–56]<br>können einen geringen ↑ der Herzfrequenz (2,1–3,3 Schläge/Minute) und eine mäßige ↓ des systolischen Blutdrucks (1,8–4,6 mmHg) vs. PL verursachen [56]<br>kein signifikanter ↑ der Raten von Hypertonie [56], Vorhofflimmern [55] oder Herzinsuffizienz [54]; keine Auswirkung auf das QT-Intervall [49]                                                                                                                                                                                                                                                                                                                                                                                                                                                    |
| mikrovaskuläre Wirkungen                 | diabetische Retinopathie: ↑ des Risikos für frühe Verschlechterung unter Semaglutid (im Einklang mit der unter Insulin zu beobachtenden frühen Verschlechterung; mit schneller und ausgeprägter Verbesserung der Blutzuckerkontrolle assoziiert) [57], aber nicht unter anderen GLP-1RA [58, 59]<br>Neuropathie: ↓ des Risikos [58, 59]                                                                                                                                                                                                                                                                                                                                                                                                                                                                                                                     |
| Lipidspiegel                             | Schell freigesetztes/retardiertes Exenatid, Liraglutid und Lixisenatid bewirkten im Allgemeinen mäßige ↓ bei High-Density-Lipoprotein-Cholesterin (0,06–0,13 mmol/l), Low-Density-Lipoprotein-Cholesterin (0,08–0,16 mmol/l) und Gesamtcholesterin (0,16–0,27 mmol/l) [60].                                                                                                                                                                                                                                                                                                                                                                                                                                                                                                                                                                                 |
| Immunogenität und allergische Reaktionen | höheres Potential für Antikörperbildung unter GLP-1RA mit von Exendin-4 abgeleiteter Struktur, da diese eine geringere Homologie zu humanem GLP-1 aufweisen als solche, die von humanem GLP-1 abgeleitet sind (Tabelle 1) [19, 49]<br>Inzidenz einer Antikörperbildung: ≈ 45 % der mit schnell freigesetztem oder retardiertem Exenatid, 70 % der mit Lixisenatid, 9 % der mit Liraglutid und ≈ 1–2 % der mit Dulaglutid oder Semaglutid behandelten Patienten [4–16]<br>Antikörper haben nur geringen Einfluss auf die Wirkung, außer möglicherweise bei Patienten mit hohen Antikörper-Titern [19, 49]<br>schwere anaphylaktische Reaktionen: unter Lixisenatid gelegentlich <sup>a</sup> ; unter Liraglutid selten <sup>a</sup> und unter Exenatid sehr selten <sup>a</sup><br>seltene <sup>a</sup> Meldungen von Pruritus, Urtikaria und Angioödem [49] |
| Reaktionen an der Injektionsstelle       | häufige <sup>a</sup> UAW wegen subkutaner Injektion; im Allgemeinen Pruritus an der Injektionsstelle; im Allgemeinen leicht ausgeprägt und vorübergehend; können bei Patienten mit Antikörpern gegen das Arzneimittel häufiger sein [19, 49, 50]<br>Nach Injektion von retardiertem Exenatid können kleine (Durchmesser im Allgemeinen < 0,05 cm) Erhebungen auf der Bauchdecke auftreten, die durch die in der Formulierung enthaltenen Polymer-Mikrosphären verursacht sind; die Erhebungen bilden sich üblicherweise innerhalb von 4–8 Wochen zurück, verursachen keine Symptome und führen nicht zum Behandlungsabbruch [12–14].                                                                                                                                                                                                                        |
| Hypoglykämien                            | GLP-1RA allein oder + Metformin: kein ↑ des Risikos für Hypoglykämien [49]<br>GLP-1RA + Sulfonylharnstoff ± Metformin oder + Insulin: ↑ des Risikos für Hypoglykämien, aber insgesamt immer noch gering [49]<br>Bei Beginn eines GLP-1RA sollte die Dosis eines Sulfonylharnstoffs oder von Insulin ↓, um Risiko für Hypoglykämien ↓.                                                                                                                                                                                                                                                                                                                                                                                                                                                                                                                       |
| akute Nierenschädigung                   | vermutlich durch Flüssigkeitsverlust und Dehydratation infolge gastrointestinaler Symptome verursacht [61]<br>wird unter sofort freigesetztem/retardiertem Exenatid und Liraglutid beobachtet; kein Kausalzusammenhang mit akuter interstitieller Nephritis [19, 49]<br>Es ist ratsam, GLP-1RA bei Patienten mit nicht-kontrolliertem Typ-2-Diabetes, Polyurie oder Polydipsie und solchen, bei denen schwere gastrointestinale Symptome (z. B. Erbrechen oder Diarrhö) auftreten, sowie bei Patienten, die eine Volumendepletion begünstigende Arzneimittel (z. B. Renin-Angiotensin-System-Inhibitoren) einnehmen, nicht anzuwenden [20, 49].                                                                                                                                                                                                             |
| Pankreatitis und Pankreaskarzinom        | Aktuelle Daten weisen nicht auf einen Zusammenhang zwischen diesen Erkrankungen und Inkretin-basierten Arzneimitteln hin [62, 63].<br>Als Vorsichtsmaßnahme sollten GLP-1RA bei Patienten mit Pankreaskarzinom oder akuter Pankreatitis nicht angewendet werden [20, 49, 51].                                                                                                                                                                                                                                                                                                                                                                                                                                                                                                                                                                               |
| C-Zell-Karzinome der Schilddrüse         | GLP-1RA verursachten in Studien bei Nagetieren aber nicht bei Primaten bei klinisch relevanter Exposition C-Zell-Tumoren der Schilddrüse; es ist nicht bekannt, ob GLP-1RA beim Menschen C-Zell-Tumoren wie medulläre Schilddrüsenkarzinome verursachen (eine Relevanz der Beobachtungen bei Nagetieren ist beim Menschen unwahrscheinlich, aber nicht auszuschließen) [4–16].<br>USA: Anwendung kontraindiziert (Black-Box-Warnhinweis) bei Patienten mit medullärem Schilddrüsenkarzinom in der Eigen- oder Familienanamnese sowie bei Patienten mit multipler endokriner Neoplasie Typ 2 [5, 7, 9, 11, 13, 14, 16]                                                                                                                                                                                                                                       |
| anderes                                  | Infektionen und Kopfschmerzen: werden in RCT-Studien häufig genannt, stehen aber nicht in Kausalzusammenhang mit GLP-1RA-Therapie [49]<br>↑ des Risikos für Knochenbrüche: im Zusammenhang mit Exenatid aber nicht Liraglutid [64]; Kausalzusammenhang wird kontrovers diskutiert [49]<br>EU: ↑ des Risikos für UAW im Bereich der Schilddrüse (z. B. Kropf); in RCT-Studien beschrieben, insbesondere bei Patienten mit vorbestehender Schilddrüsenerkrankung; bei diesen Patienten mit Vorsicht anwenden [4, 6, 8, 10, 12, 15]                                                                                                                                                                                                                                                                                                                            |

PL Placebo; RCT randomisierte, kontrollierte Studie; UAW unerwünschte Arzneimittelwirkung; ↑ Anstieg(e); ↓ Abnahme(n)

<sup>a</sup>Sehr häufige UAW wurden bei ≥ 10 % der Patienten gemeldet, häufige bei ≥ 1 bis < 10 %; seltene bei ≥ 0,1 bis < 1 % und sehr seltene bei ≥ 0,01 bis < 0,1 %.

<sup>b</sup>Schnell freigesetztes Exenatid und Lixisenatid haben eine kurze Aktivität; Liraglutid, Dulaglutid, retardiertes Exenatid und Semaglutid eine lange Aktivität.

Tabelle 6 Ausgewählte Merkmale von Glucagon-like-Peptid-1-Rezeptoragonisten (GLP-1-RA) [4–16]

| Parameter                                                         | 2-mal täglich                                                            | 1-mal täglich                                  | 1-mal wöchentlich                                                       | 1-mal wöchentlich                            | Semaglutid [15, 16]                            |
|-------------------------------------------------------------------|--------------------------------------------------------------------------|------------------------------------------------|-------------------------------------------------------------------------|----------------------------------------------|------------------------------------------------|
|                                                                   | Exenatid [4, 5]                                                          | Liraglutid [6, 7]                              | Lixisenatid [8, 9]                                                      | Exenatid [12–14]                             |                                                |
| <b>Einzelheiten zur Zulassung</b>                                 |                                                                          |                                                |                                                                         |                                              |                                                |
| Handelsname                                                       | Byetta®                                                                  | Victoza®                                       | Lyxumia® (EU);<br>Alyxin® (USA)                                         | Trulicity®<br>Bydureon®/Bydureon®<br>BCise®  | Ozempic®                                       |
| Erstzulassung                                                     | 2009                                                                     | 2009                                           | 2013                                                                    | 2014                                         | 2017                                           |
| Monotherapie                                                      | ✓                                                                        | ✓ <sup>d</sup>                                 | ✗ EU; ✓ USA                                                             | ✗                                            | ✓ <sup>d</sup>                                 |
| Kombinationstherapie                                              | ✓                                                                        | ✓                                              | ✓                                                                       | ✓                                            | ✓                                              |
| <b>Dosierung und Art der Anwendung</b>                            |                                                                          |                                                |                                                                         |                                              |                                                |
| Anfangsdosis                                                      | 5 µg 2-mal täglich                                                       | 0,6 mg/Tag                                     | 10 µg/Tag                                                               | 0,75 oder 1,5 mg/Woche                       | 0,25 mg/Woche                                  |
| Dosiserhöhung                                                     | kann ↑ auf 10 µg 2-mal<br>täglich nach ≥ 1 Monat                         | kann ↑ auf 1,2 mg/Tag<br>nach ≥ 1 Woche        | solte ↑ auf 20 µg/Tag<br>nach 15 Tagen                                  | kann ↑ auf 1,5 mg/Woche                      | solte ↑ auf 0,5 mg/Woche nach<br>4 Wochen      |
| weitere ↑ Dosis, falls erforderlich                               | ✓; ≤ 1 h vor den beiden<br>Hauptmahlzeiten im Abstand<br>von ≥ 6 Stunden | ✗; jeden Tag etwa um die<br>gleiche Uhrzeit    | ✓; ≤ 1 h vor einer beliebigen<br>(EU) oder der ersten (USA)<br>Mahlzeit | ✗; jede Woche am gleichen<br>Wochentag       | ✗; jede Woche am gleichen<br>Wochentag         |
| Beschränkung der Anwendung<br>in Bezug auf Mahlzeiten             |                                                                          |                                                |                                                                         |                                              |                                                |
| erhältliche Dosis/Pen<br>(Anzahl der Dosen/Pen)                   | 300 µg (60 × 5 µg)<br>600 µg (60 × 10 µg)                                | 18 mg (10 × 1,8; 15 × 1,2<br>oder 30 × 0,6 mg) | 140 µg/Pen (14 × 10 µg)<br>280 µg/Pen (14 × 20 µg)                      | 0,75 mg (1 × 0,75 mg)<br>1,5 mg (1 × 1,5 mg) | 2 mg (4 × 0,25 oder 0,5 mg)<br>4 mg (4 × 1 mg) |
| <b>Anforderungen an die Vorbereitung einer Injektion</b>          |                                                                          |                                                |                                                                         |                                              |                                                |
| Rekonstitution oder Mischung                                      | ✗                                                                        | ✓                                              | ✗                                                                       | ✓                                            | ✗                                              |
| Laden des Geräts vor Injektion                                    | ✓                                                                        | ✓                                              | ✓                                                                       | ✗                                            | ✓                                              |
| Einstellen der Dosis                                              | ✓                                                                        | ✓                                              | ✓                                                                       | ✗                                            | ✓                                              |
| Aufsetzen der Kanüle (inbegriffen)                                | ✓ (✗)                                                                    | ✓ (✗)                                          | ✓ (✗)                                                                   | ✓ (✗)/✗ (✓ PHN)                              | ✓ (✓)                                          |
| <b>Lagerung</b>                                                   |                                                                          |                                                |                                                                         |                                              |                                                |
| vor der 1. Anwendung                                              | 2–8°C                                                                    | 2–8°C oder < 30°C ×<br>≤ 1 Monat               | 2–8°C                                                                   | 2–8°C oder < 30°C ×<br>≤ 14 Tage             | 2–8°C                                          |
| nach der 1. Anwendung                                             | < 25°C                                                                   | 2–8°C oder < 30°C                              | < 30°C                                                                  | n.z.                                         | 2–8°C oder < 30°C                              |
| erlaubte Verwendungsdauer<br>nach der 1. Anwendung                | 30 Tage                                                                  | 30 Tage                                        | 14 Tage                                                                 | n.z.                                         | 6 Wochen EU; 8 Wochen USA                      |
| <b>Anwendung bei Patienten mit eingeschränkter Nierenfunktion</b> |                                                                          |                                                |                                                                         |                                              |                                                |
| leicht                                                            | ✓                                                                        | ✓                                              | ✓                                                                       | ✓                                            | ✓                                              |
| mittelschwer                                                      | ↑ Dosis mit Vorsicht                                                     | ✓                                              | ✓                                                                       | ↑ Dosis mit Vorsicht                         | ✓                                              |
| schwer                                                            | n.e.                                                                     | ✓                                              | n.e.                                                                    | n.e.                                         | ✓                                              |
| terminale Niereninsuffizienz                                      | n.e.                                                                     | n.e.                                           | n.e.                                                                    | n.e. EU; Vorsicht USA                        | n.e.                                           |
| <b>Anwendung bei Patienten mit eingeschränkter Leberfunktion</b>  |                                                                          |                                                |                                                                         |                                              |                                                |
| leicht bis mittelschwer                                           | ✓                                                                        | ✓                                              | ✓                                                                       | ✓ EU; Vorsicht USA                           | ✓                                              |
| schwer                                                            | ✓                                                                        | n.e.                                           | ✓                                                                       | ✓ EU; Vorsicht USA                           | Vorsicht                                       |

Sofern nicht anders angegeben beziehen sich die Angaben sowohl auf die EU als auch auf die USA. Alle GLP-1-RA sind als Zusatztherapie zu Diät und körperlicher Aktivität zugelassen.

n.e. nicht empfohlen; n.z. nicht zutreffend; PHN Pre-attached Hidden Needle (aufsitzende verborgene Nadel); ✓ zugelassen/erforderlich; ✗ nicht zugelassen/nicht erforderlich

<sup>a</sup>auch erhältlich als einmal tägliche Fixdosiskombination mit Insulin degludec (Xultophy®) [68, 69]

<sup>b</sup>auch erhältlich als einmal tägliche Fixdosiskombination mit Insulin glargin (Suliqua® in der EU [70]; Soliqua® in den USA [71])

<sup>c</sup>bezieht sich sowohl auf Bydureon zur Injektion als auch auf Bydureon® BCise Fertipens, sofern nicht anders angegeben

<sup>d</sup>wenn Metformin wegen Unverträglichkeit oder Kontraindikationen nicht eingenommen werden kann

<sup>e</sup>0,75 mg/Woche ist die Anfangsdosis bei Monotherapie und potenziell empfindlichen Populationen (d. h. Patienten ≥ 75 Jahren) in der EU und bei Kombinationstherapie in den USA; 1,5 mg/Woche ist die Anfangsdosis bei Kombinationstherapie in der EU

oder in den USA für die Behandlung des T2D zugelassen sind (Tabelle 6) [4–16]. Alle diese Wirkstoffe sind als Zusatztherapie zu Diät und körperlicher Aktivität indiziert, um bei Erwachsenen mit Typ-2-Diabetes in Kombination mit anderen blutzuckersenkenden Wirkstoffen (einschließlich Insulin) die Blutzuckerkontrolle zu verbessern, wenn durch die aktuelle Behandlung + Diät/körperliche Aktivität keine angemessene Blutzuckerkontrolle erzielt wird. Einige GLP-1RA sind ergänzend zu Diät und körperlicher Aktivität auch als Monotherapie zugelassen, oder als Monotherapie zugelassen, wenn Metformin aufgrund von Verträglichkeitsproblemen oder Kontraindikationen nicht geeignet ist (Tabelle 6) [4–16].

Alle GLP-1RA werden subkutan in die Bauchdecke, den Oberschenkel oder den Oberarm injiziert. Dabei ist bei Injektion in die gleiche Region jedes Mal eine andere Injektionsstelle zu wählen [4–16]. Die Anwendung unterscheidet sich im Hinblick auf bestimmte Parameter wie Dosierung, Verabreichung und Vorbereitung der Injektion (Tabelle 6) [4–16].

## 8 Aktueller klinischer Stellenwert von GLP-1RA

Aktuelle Behandlungsleitlinien empfehlen GLP-1RA als Behandlungsoption für T2D, und zwar meist als Add-on-Therapie bei Patienten, die ihren Blutzuckerzielwert durch Lebensstilinterventionen plus Metformin und/oder andere blutzuckersenkende Wirkstoffe nicht erreichen [1, 2]. GLP-1RA bieten als Klasse gewisse potenzielle Vorteile gegenüber anderen Klassen von blutzuckersenkenden Wirkstoffen. Im Hinblick auf Blutzuckerkontrolle und Gewichtsreduktion wurden durch GLP-1RA mindestens ebenso ausgeprägte oder ausgeprägtere Verbesserungen erzielt wie/als durch Metformin, Sulfonylharnstoffe, DPP4-Inhibitoren, Thiazolidinedione, SGLT2-Inhibitoren und lang bzw. schnell wirkende Insuline (Abschnitt 3). Die günstigen Auswirkungen von GLP-1RA auf die Blutzuckerkontrolle – einschließlich des geringen intrinsischen Hypoglykämie-Risikos – und auf die Gewichtsreduktion sind mit einer Verbesserung bei PRO-Instrumenten assoziiert, die die Zufriedenheit mit der aktuellen Diabetestherapie, die Wahrnehmung des Körpergewichts und die subjektive wahrgenommene Häufigkeit von Über- und Unterzuckerungen abbilden (Abschnitt 4).

GLP-1RA, SGLT2-Inhibitoren, DPP4-Inhibitoren und Thiazolidinedione sind häufig auf gleicher Stufe der Behandlungsleitlinien als Add-on-Therapie zur aktuellen Behandlung indiziert [1, 2]. Während sowohl GLP-1RA als auch DPP4-Inhibitoren auf Inkretin abzielen, haben GLP-1RA eine direkte intrinsische Wirkung auf das Inkretin-System,

während DPP4-Inhibitoren indirekt wirken. Letztere verhindern durch kompetitive Hemmung des DPP4-Enzyms die Inaktivierung von endogenem GLP-1RA und glukoseabhängigem insulinotropem Peptid (GIP) [72–74]. Beide Wirkstoffklassen sind mit einem niedrigen Risiko für Hypoglykämien oder Gewichtszunahme verbunden; allerdings wird durch GLP-1RA eine bessere Blutzuckerkontrolle erzielt als durch DPP4-Inhibitoren und erstere begünstigen eine Gewichtsreduktion, statt gewichtsneutral zu sein. Bei Patienten, die zwingend abnehmen müssen, könnte daher statt eines DPP4-Inhibitors bevorzugt ein GLP-1RA oder ein Wirkstoff aus der Gruppe der SGLT2-Inhibitoren (die ebenfalls eine Gewichtsreduktion begünstigen) verabreicht werden. Wenn das Gewicht kein Problem ist, eine orale Behandlung gewünscht wird oder die Behandlung mit einem GLP-1RA nicht vertragen wird, kann manchmal einem DPP4-Inhibitor der Vorzug gegeben werden.

Die Behandlung mit einem GLP-1RA oder einem SGLT2-Inhibitor mit nachgewiesenem Vorteil bei kardiovaskulären Aspekten könnte auch bei Patienten mit erhöhtem Risiko für atherosklerotische kardiovaskuläre Ereignisse gegenüber anderen Optionen bevorzugt werden [2]. In RCT-Studien zu GLP-1RA, in denen kardiovaskuläre Endpunkte untersucht wurden, bewirkten Semaglutid, Dulaglutid und Liraglutid eine signifikante Reduktion des Risikos für MACE-Ereignisse um 26 %, 13 % bzw. 12 % und retardiertes Exenatid und Lixisenatid erhöhten das MACE-Risiko zumindest nicht (Tabelle 4). Dies sind wichtige Beobachtungen, da die Behandlung des Typ-2-Diabetes auch Aspekte der Erkrankung berücksichtigen muss, die über die Blutzuckerkontrolle hinausgehen. Insgesamt liegen derzeit für Liraglutid die umfangreichsten Daten zur Wirksamkeit im Hinblick auf eine Reduktion von kardiovaskulären Ereignissen vor, gefolgt von Semaglutid und dann retardiertem Exenatid [2]. Anzumerken ist, dass auch für SGLT2-Inhibitoren bei Vergleich mit Placebo und anderen oralen blutzuckersenkenden Wirkstoffen (d. h. Metformin, Sulfonylharnstoffe, Thiazolidinedione und DPP4-Inhibitoren) ein kardiovaskulärer Nutzen gezeigt wurde [75], wobei die Evidenz für Empagliflozin moderat stärker ist als für Canagliflozin [2]. Bei Patienten, bei denen eine Herzinsuffizienz oder chronische Nierenerkrankung im Vordergrund steht, ist – solange die Nierenfunktion ausreicht – die Behandlung mit einem SGLT2-Inhibitor zu bevorzugen, für den nachgewiesen ist, dass er eine Herzinsuffizienz und/oder chronische Nierenerkrankung bessert. Bei Unverträglichkeit von/Kontraindikation für SGLT2-Inhibitoren und bei unzureichender Nierenfunktion kann ein GLP-1RA mit nachgewiesenem kardiovaskulärem Nutzen hinzugefügt werden [2].

Bei Patienten ohne manifeste atherosklerotische kardiovaskuläre Erkrankung oder chronische Nierenerkrankung, bei denen die Kosten der medikamentösen blutzuckersenkenden

Therapie ein wichtiger Faktor sind, ist im Allgemeinen die zusätzliche Gabe eines Sulfonylharnstoffs oder Thiazolidinedions zu Metformin gegenüber der zusätzlichen Gabe eines GLP-1RA, SGLT2-Inhibitors oder DPP4-Inhibitors zu bevorzugen. In einem solchen Fall ist die zusätzliche Gabe eines blutzuckersenkenden Wirkstoffs aus neueren und teureren Wirkstoffklassen späteren Behandlungslinien vorbehalten (eine Behandlung mit dem Arzneimittel mit den niedrigsten Anschaffungskosten in Betracht ziehen) [2].

Die Tatsache, dass GLP-1RA subkutan verabreicht werden müssen, ist ein Nachteil gegenüber der bequemen oralen Verabreichung der meisten anderen blutzuckersenkenden Wirkstoffklassen. Patienten mit T2D mit geringer Adhärenz zeigen schlechtere klinische Verläufe und die Adhärenz kann besonders bei blutzuckersenkenden Substanzen zur Injektion, wie GLP-1RA und Insulin, ein besonderes Problem sein. Bedenken bezüglich der Injektionen (z. B. Schmerzen, Angst vor Nadeln, Nadelgröße) und die Belastung/Unannehmlichkeit im Zusammenhang mit den Injektionen sind häufige Hindernisse für den Beginn und das Fortsetzen einer Behandlung mit blutzuckersenkenden Substanzen zur Injektion [76]. Einige Patienten könnten einmal wöchentlich injizierte GLP-1RA (d. h. Dulaglutid, retardiertes Exenatid und Semaglutid) gegenüber den einmal oder zweimal täglich zu injizierenden GLP-1RA bevorzugen.

Bislang wurde für keinen GLP-1RA gezeigt, dass er den anderen GLP-1RA insgesamt eindeutig überlegen ist. Allerdings senken langwirksame GLP-1RA den Blutzuckerspiegel durchgängig über das gesamte Dosisintervall von 1 Tag bzw. 1 Woche (Abschnitt 3), und diese Substanzen können bei ausgewählten Patienten gewisse klinische Vorteile bieten. In Metaanalysen wurden unter langwirksamen GLP-1RA ausgeprägtere Verbesserungen der Blutzuckerkontrolle beobachtet als unter kurzwirksamen, und sowohl kurzwirksame als auch langwirksame Substanzen bewirkten eine Gewichtsreduktion. Insgesamt wurden zwischen den einzelnen kurzwirksamen GLP-1RA keine durchgängig klinisch bedeutsamen Unterschiede festgestellt. Im Gegensatz dazu erwies sich der langwirksame GLP-1RA Semaglutid im Hinblick auf eine Reduktion des HbA<sub>1c</sub>-Werts und eine Gewichtsreduktion als signifikant wirksamer als die anderen einmal wöchentlich verabreichten GLP-1RA (Dulaglutid und retardiertes Exenatid; Tabelle 2).

GLP-1RA werden insgesamt im Allgemeinen gut vertragen (Abschnitt 5), allerdings können die häufigen gastrointestinalen UAW störend sein und zu einem Behandlungsabbruch führen. Derartige Ereignisse sind im Allgemeinen vorübergehend und werden über den Verlauf weniger Wochen oder Monate seltener. Gegebenenfalls lassen sich Häufigkeit und Intensität durch eine allmählichere Aufdosierung reduzieren. Reaktionen an der Injektionsstelle sind ebenfalls häufig, aber vorübergehend. Sie können

bei Patienten mit relativ hohen Antikörpertitern gegen GLP-1RA häufiger sein. Vergleichende Real-World-Daten wären hilfreich, um die relative Effektivität, Verträglichkeit und Akzeptanz dieser Wirkstoffklasse zu klären.

Bei der Verordnung der Wirkstoffe zusätzlich zu Lebensstiländerungen ± anderen blutzuckersenkenden Substanzen sollten Unterschiede beim pharmakologischen Profil und bei der Effektivität, Verträglichkeit und Anwendung der GLP-1RA sowie die Präferenzen des Patienten berücksichtigt werden. Die Patienten sind in der korrekten Anwendung des GLP-1RA-Geräts zu schulen und über die Möglichkeit behandlungsbedingter UAW sowie deren Behandlung aufzuklären. GLP-1RA sind bei angemessener Anwendung eine wertvolle und wirksame Klasse von blutzuckersenkenden Wirkstoffen, insbesondere bei Patienten, deren Typ-2-Diabetes durch Diät/körperliche Aktivität ± Metformin und andere blutzuckersenkende Wirkstoffe schwer unter Kontrolle zu bringen ist.

**Danksagungen** Die Autorin dankt Prof. John Wilding von der Abteilung Obesity & Endocrinology Research am Institute of Ageing & Chronic Disease der Universität Liverpool, Liverpool, UK, für seine Unterstützung bei der Erstellung dieser Übersichtsarbeit.

## Einhaltung von Ethik-Standards

**Finanzierung** Die Erstellung dieser Übersichtsarbeit wurde nicht durch externe Zuschüsse finanziert.

**Interessenkonflikte** K.A. Lyseng-Williamson ist Angestellte von Adis International/Springer Nature und für den Inhalt des Artikels verantwortlich. Sie meldet keine Interessenskonflikte.

**Open Access** Dieser Artikel wurde unter den Bedingungen der Internationalen Creative-Commons-Lizenz 4.0 „Attribution-NonCommercial“ (Namensnennung, nicht kommerziell) (<http://creativecommons.org/licenses/by-nc/4.0/>) veröffentlicht. Diese erlaubt die nicht-kommerzielle Nutzung, Vervielfältigung, Anpassung, Verteilung und Reproduktion in einem beliebigen Medium oder Format, solange der/die Originalautor(en) und die Quelle in angemessener Form gewürdigt werden, ein Link zur Creative-Commons-Lizenz eingefügt wird und angegeben ist, ob Änderungen erfolgten.

## Literatur

1. International Diabetes Federation. IDF clinical practice recommendations for managing type 2 diabetes in primary care. Brussels: International Diabetes Federation; 2017.
2. American Diabetes Association. 9. Pharmacological approaches to glycemic treatment: standards of medical care in diabetes—2019. *Diabetes Care*. 2019;42(Suppl 1):S90–102.
3. Ahren B. Glucagon-like peptide-1 receptor agonists for type 2 diabetes: a rational drug development. *J Diabetes Investig*. 2018. <https://doi.org/10.1111/jdi.12911>.

4. Byetta (exenatide) solution for injection in pre-filled-pen: EU summary of product characteristics. Södertälje: AstraZeneca AB; 2018.
5. Byetta (exenatide) injection: US prescribing information. Wilmington: AstraZeneca Pharmaceuticals LP; 2018.
6. Victoza (liraglutide) 6 mg/ml solution for injection in pre-filled pen: EU summary of product characteristics. Bagsværd: Novo Nordisk A/S; 2018.
7. Victoza (liraglutide) injection, for subcutaneous use: US prescribing information. Plainsboro: Novo Nordisk Inc.; 2018.
8. Lyxumia (lixisenatide) 10 and 20 micrograms solution for injection: EU summary of product characteristic. Paris: Sanofi-aventis Groupe; 2017.
9. Adlyxin (lixisenatide) injection, for subcutaneous use: US prescribing information. Bridgewater Sanofi-Aventis U.S. LLC; 2019.
10. Trulicity (dulaglutide) 0.75 and 1.5 mg solution for injection in pre-filled pen: EU summary of product characteristics. Utrecht: Eli Lilly Nederland B.V.; 2018.
11. Trulicity (dulaglutide) injection for subcutaneous use: US prescribing information. Indianapolis: Eli Lilly and Company; 2019.
12. Bydureon 2 mg prolonged-release suspension for injection (powder and solvent; pre-filled pen and BCise): EU summary of product characteristics. Södertälje (Sweden): AstraZeneca AB; 2019.
13. Bydureon® (exenatide extended-release) for injectable suspension, for subcutaneous use: US prescribing information. Wilmington (DE): AstraZeneca Pharmaceuticals LP; 2018.
14. Bydureon® BCise™ (exenatide extended-release) injectable suspension, for subcutaneous use: US prescribing information. Wilmington (DE): AstraZeneca Pharmaceuticals LP; 2019.
15. Ozempic (semaglutide) 0.25, 0.5 and 1 mg solution for injection in pre-filled pen: EU summary of product characteristics. Bagsværd: Novo Nordisk A/S; 2018.
16. Ozempic (semaglutide) injection 0.5 mg/1 mg: US prescribing information. Plainsboro: Novo Nordisk Inc.; 2017.
17. Sposito AC, Berwanger O, de Carvalho LSF, et al. GLP-1RAs in type 2 diabetes: mechanisms that underlie cardiovascular effects and overview of cardiovascular outcome data. *Cardiovasc Diabetol*. 2018;17(1):157. <https://doi.org/10.1186/s12933-018-0800-2>.
18. Sharma D, Verma S, Vaidya S, et al. Recent updates on GLP-1 agonists: current advancements and challenges. *Biomed Pharmacother*. 2018;108:952–62.
19. Gentilella R, Pechtner V, Corcos A, et al. Glucagon-like peptide-1 receptor agonists in type 2 diabetes treatment: are they all the same? *Diabetes Metab Res Rev*. 2019;35:e3070. <https://doi.org/10.1002/dmrr.3070>.
20. Sfairopoulos D, Liatis S, Tigas S, et al. Clinical pharmacology of glucagon-like peptide-1 receptor agonists. *Hormones (Athens)*. 2018;17(3):333–50.
21. Sun F, Wu S, Gou S, et al. Effect of GLP-1 receptor agonists on waist circumference among type 2 diabetes patients: a systematic review and network meta-analysis. *Endocrine*. 2015;48(3):794–803.
22. Madsbad S. Review of head-to-head comparisons of glucagon-like peptide-1 receptor agonists. *Diabetes Obes Metab*. 2016;18:317–32.
23. Hitke ZZ, Zaccardi F, Papamargaritis D, et al. Efficacy and safety of glucagon-like peptide-1 receptor agonists in type 2 diabetes: a systematic review and mixed-treatment comparison analysis. *Diabetes Obes Metab*. 2017;19(4):524–36.
24. Unni S, Wittbrodt E, Ma J, et al. Comparative effectiveness of once-weekly glucagon-like peptide-1 receptor agonists with regard to 6-month glycaemic control and weight outcomes in patients with type 2 diabetes. *Diabetes Obes Metab*. 2018;20(2):468–73.
25. Yu M, Van Brunt K, Varnado OJ, et al. Patient-reported outcome. Results in patients with type 2 diabetes treated with once-weekly dulaglutide: data from the AWARD phase III clinical trial programme. *Diabetes Obes Metab*. 2016;18(4):419–24.
26. Best JH, Boye KS, Rubin RR, et al. Improved treatment satisfaction and weight-related quality of life with exenatide once weekly or twice daily. *Diabet Med*. 2009;26(7):722–8.
27. Best JH, Rubin RR, Peyrot M, et al. Weight-related quality of life, health utility, psychological well-being, and satisfaction with exenatide once weekly compared with sitagliptin or pioglitazone after 26 weeks of treatment. *Diabetes Care*. 2011;34(2):314–9.
28. Rodbard HW, Lingvay I, Reed J, et al. Semaglutide added to basal insulin in type 2 diabetes (SUSTAIN 5): a randomized, controlled trial. *J Clin Endocrinol Metab*. 2018;103(6):2291–301.
29. Ahrén B, Masmiquel L, Kumar H, et al. Efficacy and safety of once-weekly semaglutide versus once-daily sitagliptin as an add-on to metformin, thiazolidinediones, or both, in patients with type 2 diabetes (SUSTAIN 2): a 56-week, double-blind, phase 3a, randomised trial. *Lancet Diabetes Endocrinol*. 2017;5(5):341–54.
30. Aroda VR, Bain SC, Cariou B, et al. Efficacy and safety of once-weekly semaglutide versus once-daily insulin glargine as add-on to metformin (with or without sulfonylureas) in insulin-naïve patients with type 2 diabetes (SUSTAIN 4): a randomised, open-label, parallel-group, multicentre, multinational, phase 3a trial. *Lancet Diabetes Endocrinol*. 2017;5(5):355–66.
31. Ahmann AJ, Capehorn M, Charpentier G, et al. Efficacy and safety of once-weekly semaglutide versus exenatide ER in subjects with type 2 diabetes (SUSTAIN 3): a 56-week, open-label, randomized clinical trial. *Diabetes Care*. 2017. <https://doi.org/10.2337/dc17-0417>.
32. Pratley R, Aroda V, Lingvay I, et al. Semaglutide versus dulaglutide once weekly in patients with type 2 diabetes (SUSTAIN 7): a randomised, open-label, phase 3b trial. *Lancet Diabetes Endocrinol*. 2018;6(4):275–86.
33. Uusinaraukas K, Rodbard HW, Van Gaal L, et al. Semaglutide-induced weight loss is associated with improved health-related quality of life and treatment satisfaction [abstract no. 1020-P]. *Diabetes*. 2019;68 (Suppl 1). <https://doi.org/10.2337/db19-1020-P>.
34. Giorgino F, Penformis A, Pechtner V, et al. Adherence to anti-hyperglycemic medications and glucagon-like peptide 1-receptor agonists in type 2 diabetes: clinical consequences and strategies for improvement. *Patient Prefer Adherence*. 2018;12:707–19.
35. Nguyen H, Dufour R, Caldwell-Tarr A. Glucagon-like peptide-1 receptor agonist (GLP-1RA) therapy adherence for patients with type 2 diabetes in a Medicare population. *Adv Ther*. 2017;34(3):658–73.
36. Johnston SS, Nguyen H, Felber E, et al. Retrospective study of adherence to glucagon-like peptide-1 receptor agonist therapy in patients with type 2 diabetes mellitus in the United States. *Adv Ther*. 2014;31(11):1119–33.
37. Qiao Q, Ouwens MJ, Grandy S, et al. Adherence to GLP-1 receptor agonist therapy administered by once-daily or once-weekly injection in patients with type 2 diabetes in Germany. *Diabetes Metab Syndr Obes*. 2016;9:201–5.
38. Alatorre C, Fernández Landó L, Yu M, et al. Treatment patterns in patients with type 2 diabetes mellitus treated with glucagon-like peptide-1 receptor agonists: higher adherence and persistence with dulaglutide compared with once-weekly exenatide and liraglutide. *Diabetes Obes Metab*. 2017;19(7):953–61.
39. Heile M, Wyne K, Billings LK, et al. Cardiovascular outcomes with once-weekly GLP-1 RAs: clinical and economic implications. *J Manag Care Spec Pharm*. 2018;24(9-a):S42–52.
40. Bahtiyar G, Pujais-Kury J, Sacerdote A. Cardiovascular effects of different GLP-1 receptor agonists in patients with type 2 diabetes. *Curr Diabetes Rep*. 2018;18(10):92. <https://doi.org/10.1007/s11892-018-1043-z>.
41. Li Y, Rosenbilit PD. Glucagon-like peptide-1 receptor agonists and cardiovascular risk reduction in type 2 diabetes mellitus: is it a class effect? *Curr Cardiol Rep*. 2018;20(11):113. <https://doi.org/10.1007/s11886-018-1051-2>.



42. Torekov SS. Glucagon-like peptide-1 receptor agonists and cardiovascular disease: from LEADER to EXSCEL. *Cardiovasc Res*. 2018;114(10):e70–1.
43. Marso SP, Daniels GH, Brown-Frandsen K, et al. Liraglutide and cardiovascular outcomes in type 2 diabetes. *N Engl J Med*. 2016;375(4):311–22.
44. Gerstein HC, Colhoun HM, Dagenais GR, et al. Dulaglutide and cardiovascular outcomes in type 2 diabetes (REWIND): a double-blind, randomised placebo-controlled trial. *Lancet*. 2019;1:1. [https://doi.org/10.1016/S0140-6736\(19\)31149-3](https://doi.org/10.1016/S0140-6736(19)31149-3).
45. Marso SP, Bain SC, Consoli A, et al. Semaglutide and cardiovascular outcomes in patients with type 2 diabetes. *N Engl J Med*. 2016;375(19):1834–44.
46. Pfeffer MA, Claggett B, Diaz R, et al. Lixisenatide in patients with type 2 diabetes and acute coronary syndrome. *N Engl J Med*. 2015;373(23):2247–57.
47. Holman RR, Bethel MA, Mentz RJ, et al. Effects of once-weekly exenatide on cardiovascular outcomes in type 2 diabetes. *N Engl J Med*. 2017;377(13):1228–39.
48. Bethel MA, Patel RA, Merrill P, et al. Cardiovascular outcomes with glucagon-like peptide-1 receptor agonists in patients with type 2 diabetes: a meta-analysis. *Lancet Diabetes Endocrinol*. 2018;6(2):105–13.
49. Filippatos TD, Panagiotopoulou TV, Elisaf MS. Adverse effects of GLP-1 receptor agonists. *Rev Diabet Stud*. 2014;11(3–4):202–30.
50. Handelsman Y, Wyne K, Cannon A, et al. Glycemic efficacy, weight effects, and safety of once-weekly glucagon-like peptide-1 receptor agonists. *J Manag Care Spec Pharm*. 2018;24(9-a):S14–29.
51. Romera I, Cebrián-Cuenca A, Álvarez-Guisasaola F, et al. A review of practical issues on the use of glucagon-like peptide-1 receptor agonists for the management of type 2 diabetes. *Diabetes Ther*. 2019;10:5–19.
52. Sun F, Yu K, Yang Z, et al. Impact of GLP-1 receptors agonists on major gastrointestinal disorders for type 2 diabetes mellitus: a mixed treatment comparison meta-analysis. *Exp Diabetes Res*. 2012;2012:230624.
53. Wysham C, Blevins T, Arakaki R, et al. Efficacy and safety of dulaglutide added onto pioglitazone and metformin versus exenatide in type 2 diabetes in a randomized controlled trial (AWARD-1). *Diabetes Care*. 2014;37(8):2159–67.
54. Filion KB, Azoulay L, Platt RW, et al. A multicenter observational study of incretin-based drugs and heart failure. *N Engl J Med*. 2016;374(12):1145–54.
55. Monami M, Nreu A, Scatena S, et al. Glucagon-like peptide-1 receptor agonists and atrial fibrillation: a systematic review and meta-analysis of randomised controlled trials. *J Endocrinol Investig*. 2017;40(11):1251–8.
56. Sun F, Wu S, Guo S, et al. Impact of GLP-1 receptor agonists on blood pressure, heart rate and hypertension among patients with type 2 diabetes: a systematic review and network meta-analysis. *Diabetes Res Clin Pract*. 2015;110(1):26–37.
57. Vilsboll T, Bain SC, Leiter LA, et al. Semaglutide, reduction in glycated haemoglobin and the risk of diabetic retinopathy. *Diabetes Obes Metab*. 2019;20(4):889–97.
58. Dicembrini I, Nreu B, Scatena A, et al. Microvascular effects of glucagon-like peptide-1 receptor agonists in type 2 diabetes: a meta-analysis of randomized controlled trials. *Acta Diabetol*. 2017;54(10):933–41.
59. Pang B, Zhou H, Kuang H. The potential benefits of glucagon-like peptide-1 receptor agonists for diabetic retinopathy. *Peptides*. 2018;100:123–6.
60. Sun F, Wu S, Wang J, et al. Effect of glucagon-like peptide-1 receptor agonists on lipid profiles among type 2 diabetes: a systematic review and network meta-analysis. *Clin Ther*. 2015;37(1):225–41.
61. Filippatos TD, Elisaf MS. Effects of glucagon-like peptide-1 receptors on renal function. *World J Diabetes*. 2013;4(5):190–201.
62. Egan AG, Blind E, Dunder K, et al. Pancreatic safety of incretin-based drugs: FDA and EMA assessment. *N Engl J Med*. 2014;370(9):794–7.
63. Alves C, Batel-Marques F, Macedo AF. A meta-analysis of serious adverse events reported with exenatide and liraglutide: acute pancreatitis and cancer. *Diabetes Res Clin Pract*. 2012;98(2):271–84.
64. Su B, Sheng H, Zhang M, et al. Risk of bone fractures associated with glucagon-like peptide-1 receptor agonists' treatment: a meta-analysis of randomized controlled trials. *Endocrine*. 2015;48(1):107–15.
65. Buse JB, Nauck M, Forst T, et al. Exenatide once weekly versus liraglutide once daily in patients with type 2 diabetes (DURATION-6): a randomised, open-label study. *Lancet*. 2013;381(9861):117–24.
66. Kayaniyil S, Lozano-Ortega G, Bennet HA, et al. A network meta-analysis comparing exenatide once weekly with other GLP-1 receptor agonists for the treatment of type 2 diabetes mellitus. *Diabetes Ther*. 2016;7(1):27–43.
67. Dungan KM, Povedano ST, Forst T, et al. Once-weekly dulaglutide versus once-daily liraglutide in metformin-treated patients with type 2 diabetes (AWARD-6): a randomised, open-label, phase 3, noninferiority trial. *Lancet*. 2014;384(9951):1349–57.
68. Xultophy (insulin degludec 100 units/mL + liraglutide 3.6 mg/mL) solution for injection in pre-filled pen: EU summary of product characteristics. Bagsværd: Novo Nordisk A/S; 2018.
69. Xultophy 110/3.6 (insulin degludec and liraglutide injection), for subcutaneous use: US prescribing information. Plainsboro: Novo Nordisk Inc.; 2019.
70. Suliqua 100/33 (insulin glargine 100 units/ml +lixisenatide 33 or 50 micrograms/ml) solution for injection in a pre-filled pen: EU summary of product characteristics. Paris: Sanofi-Aventis Groupe; 2017.
71. Soliqua 100/33 (insulin glargine and lixisenatide injection), for subcutaneous use: US prescribing information. Bridgewater: Sanofi-Aventis U.S. LLC; 2017.
72. Morales J. The pharmacologic basis for clinical differences among GLP-1 receptor agonists and DPP-4 inhibitors. *Postgrad Med*. 2011;123(6):189–201.
73. Madsbad S. Dipeptidyl peptidase-4 (DPP-4) inhibitors are favourable to glucagon-like peptide-1 (GLP-1) agonists: no. *Eur J Intern Med*. 2012;23(2):132–6.
74. Brunton S. GLP-1 receptor agonists vs. DPP-4 inhibitors for type 2 diabetes: is one approach more successful or preferable than the other? *Int J Clin Pract*. 2014;68(5):557–67.
75. Lee G, Oh SW, Hwang SS, et al. Comparative effectiveness of oral antidiabetic drugs in preventing cardiovascular mortality and morbidity: a network meta-analysis. *PLoS One*. 2017;12(5):e0177646.
76. Spain CV, Wright JJ, Hahn RM, et al. Self-reported barriers to adherence and persistence to treatment with injectable medications for type 2 diabetes. *Clin Ther*. 2016;38(7):1653–64.e1.
