# Supplementary material
Source: publisher figshare collection journal article supplement (https://adisjournals.figshare.com/articles/dataset/_/11320370)
Supplement: Supplementary file 2 [file 4]

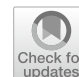

# Agonistas del receptor del péptido similar al glucagón 1 en la diabetes tipo 2: uso y características diferenciales

Katherine A. Lyseng-Williamson<sup>1</sup>

Publicación en internet: 18 de julio de 2019  
© Springer Nature Switzerland AG 2019, publicación corregida en 2019

## Resumen

Los agonistas del receptor del péptido similar al glucagón 1 (AR-GLP-1) son conocidos por su efectividad como tratamiento adyuvante a la modificación del estilo de vida en el tratamiento de la diabetes tipo 2 (DT2), tanto en monoterapia como combinados con hipoglucemiantes orales ± insulina. Las seis formulaciones subcutáneas de AR-GLP-1 actualmente disponibles en la UE y EE.UU. (exenatida dos veces al día, liraglutida y lixisenatida una vez al día, y dulaglutida, exenatida y semaglutida una vez a la semana) presentan muchas similitudes, pero también algunas propiedades y características específicas. Al estimular los receptores de GLP-1, los AR-GLP-1 aumentan la secreción de insulina y suprimen la liberación de glucagón de manera dependiente de la glucosa, mejorando así tanto los resultados clínicos como los comunicados por los pacientes en relación con el control glucémico y el peso. También se ha demostrado que los AR-GLP-1 reducen, o al menos no aumentan, el riesgo de complicaciones cardiovasculares importantes. Los AR-GLP-1 suelen ser bien tolerados por los pacientes. Los acontecimientos adversos relacionados con el fármaco más problemáticos son los trastornos gastrointestinales y las reacciones en el lugar de la inyección, y el riesgo intrínseco de hipoglucemia es muy bajo. El tratamiento con AR-GLP-1 debe personalizarse para adaptarse a las necesidades clínicas y a las preferencias de cada paciente.

## Puntos clave

- Los AR-GLP-1 mejoran el control glucémico, reducen el peso corporal y mejoran los resultados comunicados por los pacientes cuando se administran como monoterapia o como terapia adyuvante a otros hipoglucemiantes
- Los AR-GLP-1 reducen, o al menos no aumentan, el riesgo de complicaciones cardiovasculares importantes
- Los AR-GLP-1 suelen ser bien tolerados por los pacientes y presentan un riesgo intrínseco de hipoglucemia muy bajo
- La administración de AR-GLP-1 una vez a la semana puede mejorar el cumplimiento terapéutico y la satisfacción en comparación con otros tratamientos más frecuentes
- Al personalizar el tratamiento deben tenerse en cuenta las diferencias clínicas y de administración entre los AR-GLP-1, así como las preferencias de los pacientes

## 1 Razones que justifican el uso de los AR-GLP-1 en la diabetes tipo 2

En muchos pacientes, el tratamiento de la diabetes tipo 2 (DT2) requiere utilizar dos o más hipoglucemiantes [1,2]. A no ser que haya contraindicaciones o problemas de tolerancia, normalmente se utiliza metformina como terapia de primera línea, aunque para lograr un control glucémico adecuado suele ser necesario añadir fármacos hipoglucemiantes con un mecanismo de acción diferente.

El péptido similar al glucagón 1 (GLP-1), una hormona intestinal que cuenta entre sus propiedades el aumento de la secreción de insulina después de comer, juega un importante papel en la homeostasis de la glucosa [3]. Los efectos del GLP-1 están alterados en los pacientes con DM2, lo que justifica el desarrollo de agonistas del receptor de GLP-1 (AR-GLP-1) para el tratamiento de la DM2 [3]. La eficacia de estos fármacos para mejorar el control glucémico de los pacientes con DM2 está bien establecida y, a diferencia de la insulina y los secretagogos de insulina (sulfonilureas y meglitinidas, por ejemplo), inducen pérdida de peso y presentan un bajo riesgo intrínseco de hipoglucemia [3].

Este artículo revisa las características y propiedades de las seis formulaciones de AR-GLP-1 que se comercializan actualmente en la UE y EE.UU., formulaciones que se administran por vía subcutánea dos veces al día (exenatida

✉ Katherine A. Lyseng-Williamson  
DEcorrespondence@springer.com

<sup>1</sup> Springer Nature, Private Bag 65901, Mairangi Bay, Auckland 0754, Nueva Zelanda

de liberación inmediata [LI]) [4,5] una vez al día (liraglutida [6,7] y lixisenatida [8,9]) o una vez a la semana (dulaglutida [10,11], exenatida de liberación prolongada [LP] [12-14] y semaglutida [15,16]). Esta revisión no incluye los AR-GLP-1 retirados voluntariamente por motivos comerciales (como albiglutida), los AR-GLP-1 que solo se comercializan fuera de la UE/EE.UU. (como taspoglutida) ni los AR-GLP-1 disponibles como combinación a dosis fija (como la insulina degludec/liraglutida o la insulina glargina/lixisenatida).

## 2 Propiedades farmacológicas de los AR-GLP-1

El GLP-1 nativo tiene una semivida muy corta, ya que es degradado rápidamente por las proteasas, concretamente por la enzima dipeptidil peptidasa (DPP)-4 [17-19]. Para evitarlo, se han desarrollado AR-GLP-1 que son estructuralmente similares al GLP-1 respecto a su secuencia de aminoácidos, pero con modificaciones que los estabilizan frente a la degradación por DPP-4 y/o minimizan su aclaramiento renal, lo que prolonga su actividad (Tabla 1). Las variaciones en la estructura de los AR-GLP-1 también pueden determinar la accesibilidad al SNC, lo que explicaría en parte las diferencias que muestran en relación con la pérdida de peso (Tabla 2). La homología de los AR-GLP-1 con la estructura del GLP-1 humano (es decir, la proporción de la secuencia de aminoácidos similar al GLP nativo) oscila entre  $\approx 50\%$  con exenatida y lixisenatida (basadas en la molécula de exendina-4 presente en el veneno del monstruo de Gila) y el 90-97% con lixisenatida, dulaglutida y semaglutida (obtenidas a partir de la modificación del fragmento activo del GLP-1 humano) (Tabla 1) [4-16].

Los AR-GLP-1 se unen de forma selectiva a los receptores del GLP-1 y los activan de la misma manera que el GLP-1 nativo [4-16]. Cuando el nivel de glucemia es alto, la activación de los receptores del GLP-1 por los AR-GLP-1 estimula la secreción de insulina y reduce la secreción inapropiadamente elevada de glucagón de forma glucosa-dependiente, lo que mejora el control glucémico. Cuando el nivel de glucemia es bajo, los AR-GLP-1 no estimulan la secreción de insulina y no alteran la secreción de glucagón, lo que reduce el riesgo de hipoglucemia y, por tanto, también ayuda a mantener el control glucémico [17-20]. Además, la reducción de la sensación de hambre y la menor ingesta de energía también ayudan a que los pacientes pierdan peso.

Cada AR-GLP-1 es diferente en relación con el perfil farmacológico y la duración de la actividad debido a varios factores, como la velocidad de absorción, el grado de unión a las proteínas plasmáticas/albumina, el grado de protección

frente a la degradación metabólica y la velocidad de aclaramiento renal (Tabla 1) [17-20]. En función de la duración de la activación del receptor del GLP-1, exenatida LI y lixisenatida se clasifican como AR-GLP-1 de corta duración, mientras que liraglutida, dulaglutida, exenatida LP y semaglutida se clasifican como AR-GLP-1 de larga duración (Tabla 1) [17-20]. A diferencia de los AR-GLP-1 de larga duración, los AR-GLP-1 de corta duración se asocian a un importante retraso del vaciado gástrico [19].

La semivida de los AR-GLP-1 varía entre unas pocas horas y varios días, y la semivida prolongada de dulaglutida y semaglutida permite administrarlas una vez a la semana (Tabla 1) [4-16]. También la formulación LP de exenatida puede administrarse una vez a la semana, ya que la tecnología de microesferas hace que inicialmente se libere la exenatida unida a la superficie y después se vaya liberando gradualmente la contenida en las microesferas (Tabla 1) [12-14].

## 3 Efectos de los AR-GLP-1 sobre el control glucémico y la pérdida de peso

La eficacia de los AR-GLP-1 para controlar la glucemia en pacientes con DM2 está bien establecida. Esta sección ofrece una visión general de los resultados de los ensayos clínicos aleatorizados (ECA) fundamentales para la autorización de exenatida LI [4,5], liraglutida [6,7], lixisenatida [8,9], dulaglutida [10,11], exenatida LP [12-14] y semaglutida [15,16] en la UE y los EE.UU., así como otros datos relevantes.

### 3.1 Comparación con placebo, hipoglucemiantes orales e insulina

En los ECA realizados en pacientes con DM2, los AR-GLP-1 administrados en monoterapia o como terapia adyuvante fueron significativamente más efectivos que el placebo para reducir la hemoglobina glucosilada ( $HbA_{1c}$ ) respecto al valor inicial [4-16]. En general, los AR-GLP-1 administrados en monoterapia o como terapia adyuvante también demostraron no ser inferiores o ser más efectivos en la reducción de la  $HbA_{1c}$  que varios hipoglucemiantes orales, como metformina, glimepirida (una sulfonilurea), sitagliptina (un inhibidor de DPP-4), pioglitazona (una tiazolidinediona) y dapagliflozina (un inhibidor del cotransportador de sodio y glucosa tipo 2 [SGLT2]), así como insulina glargina (de larga duración) y las insulinas glulisina y lispro (de acción rápida) [4-16]. Los AR-GLP-1 se asociaron a mejoras significativas o numéricas en otras medidas de control glucémico, como el cambio respecto al valor inicial en los niveles medios de glucosa en suero/plasma en ayunas y posprandial a las 2 h [4-16].

Tabla 1 Propiedades farmacológicas de los agonistas del receptor del péptido similar al glucagón 1 (AR-GLP-1) comercializados actualmente

| Parámetro                                                                | Dos veces al día                   | Una vez al día                                                                  | Una vez a la semana                |                                                                                               |
|--------------------------------------------------------------------------|------------------------------------|---------------------------------------------------------------------------------|------------------------------------|-----------------------------------------------------------------------------------------------|
|                                                                          | Exenatida LI [4,5]                 | Liraglutida [6,7]                                                               | Lixisenatida [8,9]                 | Dulaglutida [10,11]                                                                           |
|                                                                          |                                    |                                                                                 | Exenatida LP [12,14]               | Semaglutida [15,16]                                                                           |
| Propiedades estructurales                                                |                                    |                                                                                 |                                    |                                                                                               |
| Tipo de derivado o modificación                                          | Derivado de la extendina-4         | Modificación del GLP-1 humano                                                   | Derivado de la extendina-4         | Modificación del GLP-1 humano                                                                 |
| Peso molecular                                                           | ≈ 3.300 Da                         | ≈ 3.700 Da                                                                      | 4.858 g/mol                        | ≈ 63.000 Da                                                                                   |
| % de homología de la secuencia de AA respecto al GLP-1 humano            | 53                                 | 97                                                                              | 50                                 | 90                                                                                            |
| Modificación de la secuencia N-terminal para ↑ la resistencia a la DDP-4 | Sustitución de AA en la posición 2 | Ninguna                                                                         | Sustitución de AA en la posición 2 | Sustitución de AA en la posición 8ª                                                           |
| Modificación para ↓ el aclaramiento renal y ↑ la duración del efecto     | Ninguna                            | Ácido graso C16 + espaciador de ácido glutámico añadido al AA en la posición 26 | Ninguna                            | Unido a una cadena pesada (Fc) de IgG4 humana modificada <sup>b</sup>                         |
|                                                                          |                                    |                                                                                 | Ninguna                            | Diácido graso C18 + espaciador hidrófilo añadido al AA en la posición 26 (↑ unión a albúmina) |
| Duración de la actividad <sup>c</sup>                                    | Corta                              | Larga                                                                           | Corta                              | Larga                                                                                         |
| Propiedades farmacocinéticas tras la inyección subcutánea                |                                    |                                                                                 |                                    |                                                                                               |
| Tiempo hasta C <sub>máx</sub>                                            | 2,1 h                              | 8-12 h                                                                          | 1-3,5 h                            | 2 sem. + 6-7 sem. <sup>d</sup>                                                                |
| V <sub>d</sub> aparente (L)                                              | 28,3                               | ≈ 13                                                                            | ≈ 100                              | 28,3                                                                                          |
| Unión a proteínas plasmáticas (%)                                        |                                    | < 98                                                                            | 55                                 | ≈ 12,5                                                                                        |
| Aclaramiento aparente (L/h)                                              | 9,1                                | 1,2                                                                             | 35                                 | > 99 (albúmina)                                                                               |
| Semivida terminal                                                        | 2,4 h                              | 13 h                                                                            | 3 h                                | 0,05                                                                                          |
|                                                                          |                                    |                                                                                 |                                    | ≈ 1 sem.                                                                                      |

AA: aminoácido; C<sub>máx</sub>: concentración plasmática máxima; DPP-4: dipeptidil peptidasa-4; GLP-1: péptido similar al glucagón 1; LI: liberación inmediata; LP: liberación prolongada; sem.: semana; V<sub>d</sub>: volumen de distribución; ↑: aumentar; ↓: disminuir

<sup>a</sup>Equivalente a la posición 2 en derivados de la extendina-4

<sup>b</sup>También ↓ la inmunogenicidad

<sup>c</sup>Basado en la duración de la activación del receptor del GLP-1

<sup>d</sup>Larga duración porque la formulación en microesferas libera inicialmente la exenatida unida a la superficie (C<sub>máx</sub> en la semana 2) y después se produce una liberación gradual de exenatida desde las microesferas (C<sub>máx</sub> en las semanas 6-7) durante un periodo de ≈ 10 semanas

**Tabla 2** Eficacia clínica de los agonistas del receptor del péptido similar al glucagón 1 (AR-GLP-1) comercializados actualmente, en comparación con placebo y/o fármacos hipoglucemiantes, en ensayos clínicos de fase III realizados en > 250 pacientes con diabetes tipo 2

| Tipo de tratamiento (duración del estudio)                               | Comparadores                        | Nº pacientes | HbA <sub>1c</sub> (%) |                                        | Peso (kg)             |                                        |
|--------------------------------------------------------------------------|-------------------------------------|--------------|-----------------------|----------------------------------------|-----------------------|----------------------------------------|
|                                                                          |                                     |              | Valor inicial (media) | Cambio medio respecto al valor inicial | Valor inicial (media) | Cambio medio respecto al valor inicial |
| Exenatida LI 5 o 10 µg dos veces al día [5]                              |                                     |              |                       |                                        |                       |                                        |
| Aduvante a metformina (30 sem.)                                          | Exenatida LI 5 µg dos veces al día  | 110          | 8,3                   | -0,5***                                | 100                   | -1,3 <sup>a</sup>                      |
|                                                                          | Exenatida LI 10 µg dos veces al día | 113          | 8,2                   | -0,9***                                | 100                   | -2,6 <sup>a</sup>                      |
|                                                                          | Placebo                             | 113          | 8,2                   | -0,0 <sup>a</sup>                      | 101                   | -0,2 <sup>a</sup>                      |
| Aduvante a sulfonilurea (30 sem.)                                        | Exenatida LI 5 µg dos veces al día  | 125          | 8,5                   | -0,5***                                | 95                    | -1,1 <sup>a</sup>                      |
|                                                                          | Exenatida LI 10 µg dos veces al día | 129          | 8,6                   | -0,9***                                | 95                    | -1,6 <sup>a</sup>                      |
|                                                                          | Placebo                             | 123          | 8,7                   | +0,1 <sup>a</sup>                      | 99                    | -0,8 <sup>a</sup>                      |
| Aduvante a metformina + sulfonilurea (30 sem.)                           | Exenatida LI 5 µg dos veces al día  | 245          | 8,5                   | -0,7***                                | 97                    | -1,6 <sup>a</sup>                      |
|                                                                          | Exenatida LI 10 µg dos veces al día | 241          | 8,5                   | -0,9***                                | 98                    | -1,6 <sup>a</sup>                      |
|                                                                          | Placebo                             | 247          | 8,5                   | +0,1 <sup>a</sup>                      | 99                    | -0,9 <sup>a</sup>                      |
| Aduvante a insulina glargina ± metformina y/o tiazolidinediona (30 sem.) | Exenatida LI 10 µg dos veces al día | 137          | 8,3                   | -1,7***                                | 95                    | -1,8***                                |
|                                                                          | Placebo                             | 122          | 8,5                   | -1,0 <sup>a</sup>                      | 94                    | +1,0 <sup>a</sup>                      |
| Aduvante a insulina glargina + metformina (30 sem.)                      | Exenatida LI 10 µg dos veces al día | 315          | 8,3                   | -1,1 <sup>a</sup>                      | 90                    | -2,6 <sup>a</sup>                      |
|                                                                          | Insulina lispro                     | 312          | 8,2                   | -1,1 <sup>a</sup>                      | 89                    | +1,9 <sup>a</sup>                      |
| Liraglutida 1,2 o 1,8 mg una vez al día                                  |                                     |              |                       |                                        |                       |                                        |
| Monoterapia (1 año) [6]                                                  | Liraglutida 1,2 mg/día              | 251          | 8,2                   | -0,8 <sup>††</sup>                     | 92                    | -2,05 <sup>†††</sup>                   |
|                                                                          | Liraglutida 1,8 mg/día              | 246          | 8,2                   | -1,1 <sup>†††</sup>                    | 93                    | -2,45 <sup>†††</sup>                   |
|                                                                          | Glimepirida 8 mg/día                | 248          | 8,2                   | -0,5                                   | 93                    | +1,1                                   |
| Aduvante a metformina (26 sem.) [6]                                      | Liraglutida 1,2 mg/día              | 240          | 8,3                   | -1,0 <sup>***†††</sup>                 | 89                    | -2,6 <sup>*†††</sup>                   |
|                                                                          | Liraglutida 1,8 mg/día              | 242          | 8,4                   | -1,0 <sup>***†††</sup>                 | 88                    | -2,8 <sup>*†††</sup>                   |
|                                                                          | Placebo                             | 121          | 8,4                   | +0,1                                   | 91                    | -1,5                                   |
|                                                                          | Glimepirida 4 mg/día                | 242          | 8,4                   | -1,0                                   | 89                    | +1,0                                   |
| Aduvante a glimepirida (26 sem.) [6]                                     | Liraglutida 1,2 mg/día              | 228          | 8,5                   | -1,1 <sup>***†††</sup>                 | 80                    | +0,3 <sup>†††</sup>                    |
|                                                                          | Liraglutida 1,8 mg/día              | 234          | 8,4                   | -1,1 <sup>***†††</sup>                 | 83                    | -0,2 <sup>†††</sup>                    |
|                                                                          | Placebo                             | 114          | 8,4                   | +0,2                                   | 82                    | -0,1                                   |
|                                                                          | Rosiglitazona 4 mg/día              | 231          | 8,4                   | -0,4                                   | 81                    | +2,1                                   |
| Aduvante a metformina + rosiglitazona (26 sem.) [6]                      | Liraglutida 1,2 mg/día              | 177          | 8,5                   | -1,5***                                | 95                    | -1,0                                   |
|                                                                          | Liraglutida 1,8 mg/día              | 178          | 8,6                   | -1,5***                                | 95                    | -2,0                                   |
|                                                                          | Placebo                             | 175          | 8,4                   | -0,5                                   | 99                    | +0,6                                   |
| Aduvante a glimepirida + metformina (26 sem.) [6]                        | Liraglutida 1,8 mg/día              | 230          | 8,3                   | -1,3 <sup>***††</sup>                  | 86                    | -1,8 <sup>†††</sup>                    |
|                                                                          | Placebo                             | 114          | 8,3                   | -0,2                                   | 85                    | -0,4                                   |
|                                                                          | Insulina glargina                   | 232          | 8,1                   | -1,1                                   | 85                    | +1,6                                   |
| Aduvante a metformina (26 sem.) [7]                                      | Liraglutida 1,2 mg/día              | 221          | 8,4                   | -1,2 <sup>a†††</sup>                   | 94                    | -2,7 <sup>a</sup>                      |
|                                                                          | Liraglutida 1,8 mg/día              | 218          | 8,4                   | -1,5 <sup>a†††</sup>                   | 94                    | -3,3 <sup>a</sup>                      |
|                                                                          | Sitagliptina 100 mg/día             | 219          | 8,5                   | -0,9 <sup>a</sup>                      | 94                    | -0,8 <sup>a</sup>                      |
| Aduvante a metformina ± sulfonilurea (26 sem.) [7]                       | Liraglutida 1,8 mg/día              | 233          | 8,2                   | -1,1 <sup>a†††</sup>                   | NR                    | ≈ 3                                    |
|                                                                          | Exenatida LI 10 µg dos veces al día | 231          | 8,1                   | -0,8 <sup>a</sup>                      | NR                    | ≈ 3                                    |
| Lixisenatida 20 µg una vez al día [9]                                    |                                     |              |                       |                                        |                       |                                        |
| Aduvante a metformina (24 sem.)                                          | Lixisenatida 20 µg/día              | 161          | 8,0                   | -0,7 <sup>****</sup>                   | 90                    | -2,7 <sup>***</sup>                    |
|                                                                          | Placebo                             | 162          | 8,0                   | -0,3 <sup>a</sup>                      | 88                    | -1,7 <sup>a</sup>                      |
| Aduvante a metformina (24 sem.)                                          | Lixisenatida 20 µg/día              | 318          | 8,0                   | -0,7 <sup>a</sup>                      | 94                    | -2,7 <sup>a</sup>                      |
|                                                                          | Exenatida LI 10 µg dos veces al día | 316          | 8,0                   | -0,9 <sup>a†</sup>                     | 96                    | -3,7 <sup>a</sup>                      |
| Aduvante a sulfonilurea ± metformina (24 sem.)                           | Lixisenatida 20 µg/día              | 573          | 8,3                   | -0,8 <sup>****</sup>                   | 82                    | -1,6 <sup>***</sup>                    |
|                                                                          | Placebo                             | 286          | 8,2                   | -0,2 <sup>a</sup>                      | 84                    | -0,8 <sup>a</sup>                      |
| Aduvante a pioglitazona ± metformina (24 sem.)                           | Lixisenatida 20 µg/día              | 323          | 8,1                   | -0,9 <sup>****</sup>                   | 93                    | -0,1 <sup>a</sup>                      |
|                                                                          | Placebo                             | 161          | 8,1                   | -0,4 <sup>a</sup>                      | 97                    | +0,3 <sup>a</sup>                      |

Tabla 2 (continuación)

| Tipo de tratamiento (duración del estudio)                              | Comparadores                         | Nº pacientes | HbA <sub>1c</sub> (%) |                                        | Peso (kg)             |                                        |
|-------------------------------------------------------------------------|--------------------------------------|--------------|-----------------------|----------------------------------------|-----------------------|----------------------------------------|
|                                                                         |                                      |              | Valor inicial (media) | Cambio medio respecto al valor inicial | Valor inicial (media) | Cambio medio respecto al valor inicial |
| Adyuvante a insulina basal + metformina (24 sem.)                       | Lixisenatida 20 µg/día               | 329          | 8,4                   | -0,7 <sup>a***</sup>                   | 87                    | -1,6 <sup>a</sup>                      |
|                                                                         | Placebo                              | 167          | 8,4                   | -0,3 <sup>a</sup>                      | 89                    | -0,4 <sup>a</sup>                      |
| Adyuvante a insulina basal + sulfonilurea (24 sem.)                     | Lixisenatida 20 µg/día               | 154          | 8,5                   | -0,7 <sup>a****</sup>                  | 66                    | -0,5 <sup>a</sup>                      |
|                                                                         | Placebo                              | 157          | 8,5                   | +0,1 <sup>a</sup>                      | 66                    | -0,03 <sup>a</sup>                     |
| Adyuvante a insulina glargina + metformina ± tiazolidinediona (24 sem.) | Lixisenatida 20 µg/día               | 223          | 7,6                   | -0,7 <sup>a***</sup>                   | 87                    | +0,3 <sup>a**</sup>                    |
|                                                                         | Placebo                              | 223          | 7,6                   | -0,4 <sup>a</sup>                      | 87                    | +1,1 <sup>a</sup>                      |
| Adyuvante a 1-3 hipoglucemiantes orales (26 sem.)                       | Lixisenatida 20 µg/día               | 298          | 7,8                   | -0,6 <sup>a</sup>                      | 90                    | -0,6 <sup>a††b</sup>                   |
|                                                                         | Insulina glulisina una vez al día    | 298          | 7,7                   | -0,5 <sup>a</sup>                      | 88                    | +1,0 <sup>a</sup>                      |
|                                                                         | Insulina glulisina tres veces al día | 298          | 7,8                   | -0,8 <sup>a†††</sup>                   | 90                    | +1,3 <sup>a</sup>                      |
| <b>Dulaglutida 0,75 o 1,5 mg una vez a la semana [10]</b>               |                                      |              |                       |                                        |                       |                                        |
| Monoterapia (1 año)                                                     | Dulaglutida 0,75 mg/sem.             | 270          | 7,6                   | -0,5 <sup>†</sup>                      | NR                    | -1,1                                   |
|                                                                         | Dulaglutida 1,5 mg/sem.              | 269          | 7,6                   | -0,7 <sup>†</sup>                      | NR                    | -1,9                                   |
|                                                                         | Metformina 1,5-2 g/día               | 268          | 7,6                   | -0,5                                   | NR                    | -2,2 <sup>‡</sup>                      |
| Adyuvante a metformina (2 años)                                         | Dulaglutida 0,75 mg/sem.             | 302          | 8,2                   | -0,7 <sup>†</sup>                      | NR                    | -2,4                                   |
|                                                                         | Dulaglutida 1,5 mg/sem.              | 304          | 8,1                   | -1,0 <sup>†</sup>                      | NR                    | -2,9 <sup>††</sup>                     |
|                                                                         | Sitagliptina 100 mg/día              | 315          | 8,1                   | -0,3                                   | NR                    | -1,7                                   |
| Adyuvante a metformina (26 sem.)                                        | Dulaglutida 1,5 mg/sem.              | 299          | 8,1                   | -1,4                                   | NR                    | -2,9                                   |
|                                                                         | Liraglutida 1,8 mg/día               | 300          | 8,1                   | -1,4                                   | NR                    | -3,6 <sup>‡‡</sup>                     |
| Adyuvante a metformina + sulfonilurea (1,5 años)                        | Dulaglutida 0,75 mg/sem.             | 272          | 8,2                   | -0,6                                   | NR                    | -1,5 <sup>††</sup>                     |
|                                                                         | Dulaglutida 1,5 mg/sem.              | 273          | 8,1                   | -0,9 <sup>†</sup>                      | NR                    | -2,0 <sup>††</sup>                     |
|                                                                         | Insulina glargina                    | 262          | 8,1                   | -0,6                                   | NR                    | +1,3                                   |
| Adyuvante a glimepirida (24 sem.)                                       | Dulaglutida 1,5 mg/sem.              | 239          | 8,4                   | -1,4 <sup>**</sup>                     | NR                    | -0,9                                   |
|                                                                         | Placebo                              | 60           | 8,4                   | -0,1                                   | NR                    | -0,2                                   |
| Adyuvante a SGLTI ± metformina (24 sem.)                                | Dulaglutida 0,75 mg/sem.             | 141          | 8,0                   | -1,2 <sup>**</sup>                     | NR                    | -2,6                                   |
|                                                                         | Dulaglutida 1,5 mg/sem.              | 142          | 8,0                   | -1,3 <sup>**</sup>                     | NR                    | -3,1                                   |
|                                                                         | Placebo                              | 140          | 8,0                   | -0,5                                   | NR                    | -2,3                                   |
| Adyuvante a metformina + pioglitazona (1 año)                           | Dulaglutida 0,75 mg/sem.             | 280          | 8,1                   | -1,1 <sup>†</sup>                      | NR                    | +0,4                                   |
|                                                                         | Dulaglutida 1,5 mg/sem.              | 279          | 8,1                   | -1,4 <sup>†</sup>                      | NR                    | -1,1                                   |
|                                                                         | Exenatida LI 10 µg dos veces al día  | 276          | 8,1                   | -0,8                                   | NR                    | -0,8 <sup>‡</sup>                      |
| Sustitución de la insulina previa (1 año)                               | Dulaglutida 0,75 mg/sem.             | 293          | 8,4                   | -1,4 <sup>†</sup>                      | NR                    | +0,9 <sup>††</sup>                     |
|                                                                         | Dulaglutida 1,5 mg/sem.              | 295          | 8,5                   | -1,5 <sup>†</sup>                      | NR                    | -0,4 <sup>††</sup>                     |
|                                                                         | Insulina glargina                    | 296          | 8,5                   | -1,2                                   | NR                    | +2,9                                   |
| <b>Exenatida LP 2 mg una vez a la semana</b>                            |                                      |              |                       |                                        |                       |                                        |
| Monoterapia o adyuvante a 1 o 2 hipoglucemiantes orales (24 sem.) [12]  | Exenatida LP 2 mg/sem.               | 129          | 8,5                   | -1,6 <sup>†††</sup>                    | 97                    | -2,3                                   |
|                                                                         | Exenatida LI 10 µg dos veces al día  | 123          | 8,4                   | -0,9                                   | 94                    | -1,4                                   |
| Monoterapia o adyuvante a 1 o 2 hipoglucemiantes orales (30 sem.) [12]  | Exenatida LP 2 mg/sem.               | 148          | 8,3                   | -1,9 <sup>†</sup>                      | 102                   | -3,7                                   |
|                                                                         | Exenatida LI 10 µg dos veces al día  | 147          | 8,3                   | -1,5                                   | 102                   | -3,6                                   |
| Adyuvante a metformina (26 sem.) [12]                                   | Exenatida LP 2 mg/sem.               | 160          | 8,6                   | -1,6 <sup>†c</sup>                     | 89                    | -2,3 <sup>†d</sup>                     |
|                                                                         | Sitagliptina 100 mg/día              | 166          | 8,5                   | -0,9                                   | 87                    | -0,8                                   |
|                                                                         | Pioglitazona 45 mg/día               | 165          | 8,5                   | -1,2                                   | 86                    | +2,8                                   |
| Adyuvante a metformina ± sulfonilurea (26 sem.) [12]                    | Exenatida LP 2 mg/sem.               | 233          | 8,3                   | -1,5 <sup>†</sup>                      | 91                    | -2,6 <sup>†</sup>                      |
|                                                                         | Insulina glargina                    | 223          | 8,3                   | -1,3                                   | 91                    | +1,4                                   |
| Adyuvante a insulina glargina ± metformina (28 sem.; 458) [12]          | Exenatida LP 2 mg/sem.               | 230          | 8,5                   | -1,0 <sup>**</sup>                     | 94                    | -1,0 <sup>**</sup>                     |
|                                                                         | Placebo                              | 228          | 8,5                   | -0,2                                   | NR                    | +0,5                                   |
| Adyuvante a 1 o 2 hipoglucemiantes orales (26 sem.; 911) [13]           | Exenatida LP 2 mg/sem.               | 461          | 8,5                   | -1,3 <sup>a</sup>                      | NR                    | -2,7 <sup>a</sup>                      |
|                                                                         | Liraglutida 1,8 mg/día               | 450          | 8,4                   | -1,5 <sup>a</sup>                      | NR                    | -3,6 <sup>a</sup>                      |

Tabla 2 (continuación)

| Tipo de tratamiento (duración del estudio)             | Comparadores             | Nº pacientes | HbA <sub>1c</sub> (%) |                                        | Peso (kg)             |                                        |
|--------------------------------------------------------|--------------------------|--------------|-----------------------|----------------------------------------|-----------------------|----------------------------------------|
|                                                        |                          |              | Valor inicial (media) | Cambio medio respecto al valor inicial | Valor inicial (media) | Cambio medio respecto al valor inicial |
| Semaglutida 0,5 o 1,0 mg una vez a la semana [15]      |                          |              |                       |                                        |                       |                                        |
| Monoterapia (30 sem.)                                  | Semaglutida 0,5 mg/sem.  | 128          | 8,1                   | −1,5***                                | 90                    | −3,7***                                |
|                                                        | Semaglutida 1,0 mg/sem.  | 130          | 8,1                   | −1,6***                                | 97                    | −4,5***                                |
|                                                        | Placebo                  | 129          | 8,0                   | 0                                      | 90                    | −1,0                                   |
| Adyuvante a insulina basal ± metformina (30 sem.)      | Semaglutida 0,5 mg/sem.  | 132          | 8,4                   | −1,4***                                | 93                    | −3,7***                                |
|                                                        | Semaglutida 1,0 mg/sem.  | 131          | 8,3                   | −1,8***                                | 93                    | −6,4***                                |
|                                                        | Placebo                  | 133          | 8,4                   | −0,1                                   | 90                    | −1,4                                   |
| Adyuvante a metformina y/o tiazolidinediona (56 sem.)  | Semaglutida 0,5 mg/sem.  | 409          | 8,0                   | −1,3 <sup>†††</sup>                    | 90                    | −4,3 <sup>†††</sup>                    |
|                                                        | Semaglutida 1,0 mg/sem.  | 409          | 8,0                   | −1,6 <sup>†††</sup>                    | 89                    | −6,1 <sup>†††</sup>                    |
|                                                        | Sitagliptina 100 mg/día  | 407          | 8,2                   | −0,5                                   | 89                    | −1,4                                   |
| Adyuvante a metformina ± sulfonilurea u otro (56 sem.) | Semaglutida 1,0 mg/sem.  | 404          | 8,4                   | −1,5 <sup>†††</sup>                    | 96                    | −5,6 <sup>†††</sup>                    |
|                                                        | Exenatida LP             | 405          | 8,3                   | −0,9                                   | 95                    | −1,9                                   |
| Adyuvante a metformina ± sulfonilurea (30 sem.)        | Semaglutida 0,5 mg/sem.  | 362          | 8,1                   | −1,2 <sup>†††</sup>                    | 94                    | −3,5 <sup>†††</sup>                    |
|                                                        | Semaglutida 1,0 mg/sem.  | 360          | 8,2                   | −1,6 <sup>†††</sup>                    | 94                    | −5,2 <sup>†††</sup>                    |
|                                                        | Insulina glargina        | 360          | 8,1                   | −0,8                                   | 93                    | +1,2                                   |
| Adyuvante a metformina (40 sem.)                       | Semaglutida 0,5 mg/sem.  | 301          | 8,3                   | −1,5 <sup>†††</sup>                    | 96                    | −4,6 <sup>†††</sup>                    |
|                                                        | Dulaglutida 0,75 mg/sem. | 299          | 8,2                   | −1,1                                   | 96                    | −2,3                                   |
| Adyuvante a metformina (40 sem.)                       | Semaglutida 1,0 mg/sem.  | 300          | 8,2                   | −1,8 <sup>†††</sup>                    | 96                    | −6,5 <sup>†††</sup>                    |
|                                                        | Dulaglutida 1,5 mg/sem.  | 299          | 8,2                   | −1,4                                   | 93                    | −3,0                                   |

Para mantener la coherencia entre los datos de los diferentes AR-GLP-1, los resultados que se presentan corresponden a las poblaciones de análisis por intención de tratar en los ensayos clínicos controlados y aleatorizados de > 250 pacientes y una duración ≥ 24 semanas incluidos en la información de prescripción de la UE [6,10,12,15] o EE.UU. [5,7,9,13] (basado en la integridad de los datos publicados).

Únicamente se han incluido los ensayos clínicos que evalúan las dosis aprobadas de los AR-GLP-1 como monoterapia o como única terapia añadida a un tratamiento previo (+ dieta/ejercicio) y de los que se han publicado datos estadísticos de HbA<sub>1c</sub> (valor inicial y cambios respecto al valor inicial). Los AR-GLP-1 y las dosis optimizadas de las insulinas se administraron por vía subcutánea; otros comparadores activos se administraron por vía oral

HbA<sub>1c</sub>: hemoglobina glucosilada; NR: no registrado; SGLT2I: inhibidor del cotransportador de sodio-glucosa 2; sem.: semana

\* $p < 0,05$ ; \*\* $p < 0,01$ ; \*\*\* $p < 0,0001$  para AR-GLP-1 vs. placebo

<sup>†</sup> $p < 0,05$ ; <sup>††</sup> $p < 0,01$ ; <sup>†††</sup> $p < 0,0001$  para AR-GLP-1 vs. comparador activo

<sup>‡</sup> $p < 0,05$  vs. dulaglutida 0,75 mg/sem.; <sup>‡‡</sup> $p < 0,05$  vs. dulaglutida 1,5 mg/sem.; <sup>‡‡‡</sup> $p = 0,0002$  vs. lixisenatida 20 µg/día

<sup>a</sup>Media de mínimos cuadrados

<sup>b</sup>Frente a insulina glulisina tres veces al día

<sup>c</sup> $p < 0,0001$  para exenatida LP vs. sitagliptina y  $p < 0,05$  para exenatida LP vs. pioglitazona

<sup>d</sup> $p < 0,05$  para exenatida LP vs. sitagliptina y  $p < 0,0001$  para exenatida LP vs. pioglitazona

En consonancia con su eficacia para reducir los niveles de HbA<sub>1c</sub>, los AR-GLP-1 también se relacionaron con la consecución de los objetivos de HbA<sub>1c</sub> (es decir, HbA<sub>1c</sub> ≤ 6,5% o < 7%) [4-16]. La proporción de pacientes que alcanzaron su objetivo de HbA<sub>1c</sub> varió en función del diseño del ECA (esto es, duración del ensayo clínico, situación inicial y tratamiento comparador, criterios de inclusión/exclusión, dosis del AR-GLP-1, etc.). Por ejemplo, según se comunicó en los ECA incluidos en la Tabla 2, los porcentajes de pacientes que alcanzaron el objetivo de HbA<sub>1c</sub> < 7% al final del estudio fueron: 25-57% con exenatida LI, 35-58% con liraglutida, 25-50% con lixisenatida, 34-71% con dulaglutida, 27-73% con exenatida LP y 55-79% con semaglutida [4-16]. En general, la proporción

de pacientes que alcanzaron este objetivo en los diferentes ECA fue significativa o numéricamente mayor con AR-GLP-1 que con placebo (5-39%), y similar o algo mayor con AR-GLP-1 que con los hipoglucemiantes orales (p. ej., 48-52% con metformina, 30-40% con sitagliptina, 28-36% con glimepirida y 22-55% con tiazolidinedionas) y con la insulina (30-54% con las insulinas glargina, glulisina o lispro) [4-16].

En muchos ECA el tratamiento con AR-GLP-1 se asoció a pérdida de peso (Tabla 2), lo cual es una cuestión importante en el tratamiento de la DM2. En la mayoría de los ECA, la disminución del peso respecto al nivel inicial fue mayor con los AR-GLP-1 que con placebo, ya fuese en monoterapia o como adyuvante al tratamiento con uno o



más hipoglucemiantes [4-16]. Respecto al tratamiento adyuvante con otros hipoglucemiantes orales e insulina, la reducción respecto al peso inicial fue significativamente mayor con un AR-GLP-1 en las siguientes comparaciones: liraglutida frente a glimepirida, rosiglitazona e insulina glargina; lixisenatida frente a insulina glulisina tres veces al día; dulaglutida frente a sitagliptina e insulina glargina; exenatida LP frente a sitagliptina, pioglitazona e insulina glargina; y semaglutida frente a sitagliptina e insulina glargina (Tabla 2).

Los AR-GLP-1 también se asociaron a reducción del contorno de cintura respecto al valor inicial [21] según un metaanálisis en red de 17 ECA [21]. Esta reducción fue mayor con los AR-GLP-1 que con placebo, tiazolidinedionas e insulina, y ligeramente mayor que con sitagliptina [21].

### 3.2 Comparaciones entre los AR-GLP-1

Dadas las diferencias farmacológicas entre los distintos AR-GLP-1 (Tabla 1), los fármacos de esta clase también pueden presentar diferencias en su efectividad [18-20,22]. Sin embargo, hay pocos ECA que hayan comparado directamente la eficacia relativa de estos fármacos entre sí (Tabla 2). En las comparaciones directas disponibles, las reducciones respecto al nivel inicial de HbA<sub>1c</sub> fueron significativamente mayores con exenatida LI 10 µg dos veces al día que con lixisenatida 20 µg/día; con liraglutida 1,8 mg/día que con exenatida LI 10 µg dos veces al día; con dulaglutida 0,75 o 1,5 mg/semana que con exenatida LI 10 µg dos veces al día; con semaglutida 0,5 mg/semana que con dulaglutida 0,75 mg/semana; con semaglutida 1,0 mg/semana que con dulaglutida 1,5 mg/semana y con semaglutida 1,0 mg/semana que con exenatida LP; no se detectaron diferencias significativas entre exenatida LP y liraglutida (Tabla 2).

Debido a su acción sobre el retraso del vaciado gástrico, los AR-GLP-1 de corta duración tuvieron un mayor efecto sobre los niveles de glucemia posprandial que los de larga duración. Sin embargo, los AR-GLP-1 de larga duración ofrecen la ventaja farmacológica de reducir los niveles de glucosa en plasma durante los intervalos de administración de 1 día o 1 semana [18,20,22]. En un metaanálisis de ECA que comparaban un AR-GLP-1 con placebo o con otro AR-GLP-1 [23], dulaglutida, exenatida, liraglutida y lixisenatida mejoraron los niveles de HbA<sub>1c</sub> y glucemia en ayunas en comparación con placebo (en el momento del metaanálisis no había datos disponibles de semaglutida). En general, los AR-GLP-1 de larga duración (dulaglutida y exenatida LP una vez a la semana, liraglutida una vez al día) fueron superiores a los de corta duración (exenatida dos veces al día y lixisenatida una vez al día) respecto a la mejora del control glucémico, mientras que no se observaron diferencias en las comparaciones entre los diferentes fármacos de corta o

larga duración [23]. Sería interesante realizar un metaanálisis actualizado que incluyera datos de semaglutida, dada la eficacia significativamente mayor demostrada por este fármaco en los ECA de comparación directa con los otros dos AR-GLP-1 semanales actualmente disponibles.

Cuando semaglutida una vez a la semana se añadió a la terapia hipoglucemiante oral, la reducción de peso superó en más de dos veces ( $p < 0,0001$ ) los valores de exenatida LP una vez a la semana y dulaglutida una vez a la semana (Tabla 2). Las reducciones de peso con liraglutida 1,8 mg una vez al día fueron comparables a las observadas con exenatida LI 10 µg dos veces al día y significativamente mayores que con dulaglutida 1,5 mg/semana (Tabla 2). Estos datos clínicos están respaldados por los resultados de la práctica clínica real [24]. En un estudio de cohortes retrospectivo realizado en 2.465 pacientes que recibieron exenatida, dulaglutida o albiglutida una vez a la semana, la reducción media global de la HbA<sub>1c</sub> entre el inicio y los 6 meses fue del 0,5%, sin diferencias significativas entre los grupos de tratamiento [24]. Sin embargo, la pérdida de peso fue significativamente mayor con dulaglutida que con exenatida y albiglutida (2,7 vs. 1,4 y 1,6 kg;  $p = 0,001$ ) [24].

## 4 Efectos de los AR-GLP-1 administrados una vez a la semana sobre las variables comunicadas por los pacientes

Los AR-GLP-1 administrados una vez a la semana lograron mejoras respecto al valor inicial en la mayoría de las variables comunicadas por los pacientes en relación con el tratamiento de la DM2; en algunos ECA también se observaron mejoras significativas frente a placebo o los comparadores activos (Tabla 3) [25-32]. Dadas las diferencias en el diseño de los estudios (p. ej., comparadores, mediciones de las variables comunicadas por los pacientes, criterios de inclusión y duración del estudio), los resultados tienden a variar entre los ECA.

En general, los datos actualmente disponibles sugieren que el tratamiento con un AR-GLP-1 una vez a la semana puede mejorar de forma significativa las puntuaciones del *Cuestionario de satisfacción con el tratamiento de la diabetes* (DTSQ) total, la satisfacción con el tratamiento y la percepción del paciente en relación con la frecuencia de hiperglucemia, en comparación con placebo (Tabla 3) [25-32] y, en algunos ECA, también en comparación con otros hipoglucemiantes (normalmente semaglutida frente a sitagliptina o insulina glargina [28-32]) (Tabla 3). Con algunas excepciones, por lo general la percepción de los pacientes sobre la frecuencia de hipoglucemia en el cuestionario DTSQ y las variables comunicadas por los pacientes en relación con el peso no mejoraron de manera significativamente

**Tabla 3** Resumen de las variables comunicadas por los pacientes en relación con la diabetes tipo 2 en ensayos clínicos en fase III, controlados y aleatorizados con agonistas del receptor del péptido similar al glucagón 1 (AR-GLP-1) administrados una vez a la semana

| Variable comunicada por el paciente                                                           | Dulaglutida 0,75 o 1,5 mg/sem. [25]                                                                                                                                            | Exenatida LP 2 mg/sem. [26,27]                                                                          | Semaglutida 0,5 o 1,0 mg/sem. [28-32]                                                                                                                                                      |
|-----------------------------------------------------------------------------------------------|--------------------------------------------------------------------------------------------------------------------------------------------------------------------------------|---------------------------------------------------------------------------------------------------------|--------------------------------------------------------------------------------------------------------------------------------------------------------------------------------------------|
| <b>Puntuaciones del cuestionario de satisfacción con el tratamiento de la diabetes (DTSQ)</b> |                                                                                                                                                                                |                                                                                                         |                                                                                                                                                                                            |
| Puntuación total                                                                              | $p < 0,05$ vs. placebo y exenatida LI (26 sem.)<br><br>NS vs. metformina y liraglutida (26 sem.)                                                                               | NS vs. exenatida LI (30 y 52 sem.),<br>y sitagliptina y pioglitazona (26 sem.)                          | $p < 0,05$ vs. placebo e insulina glargina (30 sem.),<br>y sitagliptina o exenatida LP (56 sem.)<br><br>1,0 mg/sem.: $p < 0,01$ vs. exenatida LP (56 sem.)<br>NS vs. dulaglutida (40 sem.) |
| Puntuación de satisfacción con el tratamiento actual                                          |                                                                                                                                                                                | NS vs. exenatida LI (30 y 52 sem.),<br>y sitagliptina y pioglitazona (26 sem.)                          | $p < 0,05$ vs. sitagliptina (56 sem.)<br>NS vs. insulina glargina (30 sem.) y dulaglutida (40 sem.)                                                                                        |
| Puntuación de percepción de la frecuencia de hiperglucemia                                    | $p < 0,05$ vs. placebo y exenatida LI (26 sem.)<br>1,5 mg/sem.: $p < 0,05$ vs. metformina (26 sem.)                                                                            | $p < 0,05$ vs. exenatida LI (30 y 52 sem.)<br>NS vs. sitagliptina y pioglitazona (26 sem.)              | $p < 0,05$ vs. insulina glargina (30 sem.), dulaglutida (40 sem.) y sitagliptina (56 sem.)                                                                                                 |
| Puntuación de percepción de la frecuencia de hipoglucemia                                     | $p < 0,05$ vs. exenatida LI (26 sem.)<br>NS vs. placebo y metformina (26 sem.)                                                                                                 | NS vs. exenatida LI (30 y 52 sem.),<br>y sitagliptina y pioglitazona (26 sem.)                          | NS vs. insulina glargina (30 sem.), dulaglutida (40 sem.) y sitagliptina (56 sem.)                                                                                                         |
| <b>Puntuaciones en relación con el peso</b>                                                   |                                                                                                                                                                                |                                                                                                         |                                                                                                                                                                                            |
| Impacto del peso sobre la puntuación de autopercepción                                        | NS vs. placebo, metformina, exenatida LI y liraglutida (26 sem.), e insulina glargina (52 sem.)<br>1,5 mg/sem.: $p < 0,05$ vs. placebo (28 sem.) e insulina glargina (26 sem.) |                                                                                                         |                                                                                                                                                                                            |
| Impacto del peso sobre la puntuación de calidad de vida (IWQOL-Lite)                          | NS vs. sitagliptina (52 sem.)                                                                                                                                                  | $p < 0,05$ vs. pioglitazona (26 sem.)<br>NS vs. exenatida LI (30 y 52 sem.)<br>y sitagliptina (26 sem.) |                                                                                                                                                                                            |

Los ECA tenían una duración de 26-56 sem. [25-32]. Los AR-GLP-1 y los comparadores se añadieron al tratamiento con 1-3 hipoglucemiantes, a excepción de un ECA con dulaglutida vs. metformina en monoterapia [25]. Los resultados que se presentan se limitan a las puntuaciones totales y de las principales subescalas de las variables referidas por los pacientes en relación con la diabetes tipo 2 que fueron evaluadas en más de un ECA. Salvo que se indique otra cosa, los resultados que se presentan corresponden a ambas dosis de dulaglutida y semaglutida. Los comparadores activos se administraron en una dosis diaria de 1,5-2 g para la metformina, 45 mg para la pioglitazona, 100 mg para la sitagliptina y 1,8 mg para la liraglutida.

ECA: ensayo clínico controlado y aleatorizado; LP: liberación prolongada; NS: diferencia no significativa entre el AR-GLP-1 y el comparador; sem.: semana



mayor con los AR-GLP-1 administrados una vez a la semana que con placebo o los hipoglucemiantes (Tabla 3). En las comparaciones directas de AR-GLP-1, las mejoras en algunas puntuaciones del cuestionario DTSQ fueron mayores con dulaglutida o con exenatida LP administradas una vez a la semana que con exenatida LI [25,26], y también fueron mayores con semaglutida que con exenatida LP [31] (Tabla 3).

La calidad de vida relacionada con la salud (CVRS) general se evaluó en varios ECA, en los que se observó que los AR-GLP-1 administrados una vez a la semana proporcionaban mejoras sistemáticas y significativas respecto al valor inicial en la mayoría de las variables comunicadas por los pacientes en relación con la CVRS, como el *Cuestionario EuroQol de 5 dimensiones*, el *Índice de bienestar general psicológico* (PGWBI) y el *Cuestionario Short-Form-36* (SF-36), tanto en la puntuación total como en la de los diferentes dominios [25,27,29,30,32]. Sin embargo, con algunas excepciones, los AR-GLP-1 administrados una vez a la semana no siempre dieron lugar a mejoras significativamente superiores en estos resultados respecto a placebo o los comparadores activos [25,27,29,30,32].

En cualquier caso, las variables comunicadas por los pacientes en relación con la DM2 y la CVRS general pueden mejorar en presencia de una pérdida de peso significativa, como la observada con semaglutida [33]. En los análisis agrupados de las variables comunicadas por los pacientes en 2.808 sujetos tratados con semaglutida 0,5 o 1,0 mg/semana, aquellos que presentaban una pérdida de peso  $\geq 5\%$  o  $\geq 10\%$  mostraron una mejora significativamente mayor ( $p < 0,01$ ) en las puntuaciones del resumen del componente físico, la salud general y la función física del *Cuestionario SF-36*, versión 2, que los pacientes que no habían tenido esta respuesta de pérdida de peso [33]. También las puntuaciones de satisfacción global con el tratamiento y percepción de la frecuencia de hiperglucemia en el *Cuestionario DTSQ* fueron significativamente mayores ( $p < 0,01$ ) en los pacientes que perdieron  $\geq 5\%$  o  $\geq 10\%$  de su peso que en los que no tuvieron esta respuesta [33].

El cumplimiento terapéutico podría ser mayor con los AR-GLP-1 que se administran una vez a la semana que con las opciones que se administran una o dos veces al día, con la consiguiente mejora de los resultados clínicos [34]. Durante un periodo de 6 meses en estudios retrospectivos realizados en la práctica clínica real, el cumplimiento terapéutico fue significativamente mayor con exenatida LP una vez a la semana que con exenatida LI dos veces al día [35,36] y/o liraglutida una vez al día [35-37]. Con dulaglutida una vez a la semana las tasas de persistencia y cumplimiento terapéutico fueron significativamente mayores, y las tasas de interrupción del tratamiento significativamente menores, que con liraglutida una vez al día y exenatida una vez a la semana [38].

## 5 Efectos de los AR-GLP-1 sobre las complicaciones cardiovasculares importantes

Como los pacientes con DM2 presentan un mayor riesgo de complicaciones cardiovasculares (CV), el manejo actual de la DM2 incluye la reducción de los factores de riesgo CV, como por ejemplo la hiperglucemia [39,40]. Los AR-GLP-1, como clase, proporcionan efectos beneficiosos respecto a varios factores de riesgo CV, dado que mejoran el control glucémico y promueven la pérdida de peso (Secc. 3), además de mejorar factores que son independientes de los cambios en la glucemia [39-42].

Los ECA que han evaluado los acontecimientos adversos CV importantes (AACI) de los AR-GLP-1 administrados una vez al día o una vez a la semana en pacientes con DM2 muestran una incidencia de AACI significativamente menor que placebo (liraglutida [43], dulaglutida [44] y semaglutida [45]), o al menos no mayor (lixisenatida [46] y exenatida LP [47]), con *hazard ratios* comprendidos entre 0,74 y 1,02 (Tabla 4). El componente que pareció ser el principal responsable de la reducción de los AACI fue la muerte por causa CV en el caso de liraglutida [43] y el ictus no mortal en los casos de dulaglutida [44] y semaglutida [45], sin que se observasen otras diferencias significativas en el riesgo de los componentes individuales de AACI entre los AR-GLP-1 y el placebo (Tabla 4). El riesgo de muerte por cualquier causa fue significativamente menor con liraglutida y exenatida LP que con placebo (Tabla 4).

Las discrepancias entre los ensayos clínicos pueden explicarse por varios factores, como la heterogeneidad entre los ECA, la definición de las variables compuestas e individuales, la farmacocinética de los AR-GLP-1 y el grado en que cada AR-GLP-1 puede afectar a los factores de riesgo CV modificables [39-42,44]. Según un metanálisis de ECA de lixisenatida, liraglutida, exenatida LP y semaglutida que evaluó los resultados CV, en general estos AR-GLP-1 redujeron de forma significativa el riesgo de AACI (10%), la mortalidad por causa CV (13%) y la mortalidad por cualquier causa (12%), respecto a placebo [48].

## 6 Perfiles de tolerabilidad de los AR-GLP-1

En general, los AR-GLP-1 son bien tolerados; las reacciones farmacológicas adversas (RFA) más frecuentes son los trastornos gastrointestinales (Tabla 5) [19,49-51]. Hay que señalar que, como los efectos de los AR-GLP-1 son dependientes de la glucosa, no conllevan un riesgo intrínseco de hipoglucemia. En los ECA, los AR-GLP-1 se asociaron a tasas muy bajas de hipoglucemia importante/grave cuando se utilizaron como monoterapia o en combinación con otros fármacos hipoglucemiantes [4-16]. Sin embargo, cuando se

**Tabla 4** Resultados de los ensayos clínicos aleatorizados y controlados con placebo que evalúan los efectos de los agonistas del receptor del péptido similar al glucagón 1 (AR-GLP-1) sobre los acontecimientos adversos cardiovasculares importantes (AACI)

|                                                                  | AR-GLP-1 administrados una vez al día      |                                                   | AR-GLP-1 administrados una vez a la semana              |                                           |                                                   |
|------------------------------------------------------------------|--------------------------------------------|---------------------------------------------------|---------------------------------------------------------|-------------------------------------------|---------------------------------------------------|
|                                                                  | Liraglutida 1,8 mg/día<br>vs. PL [6,7,43]  | Lixisenatida 20 µg/día<br>vs. PL [8,9,46]         | Dulaglutida 1,5 mg/sem.<br>vs. PL [44]                  | Exenatida LP 2 mg/<br>sem. vs. PL [12,47] | Semaglutida 0,5/<br>1,0 mg/sem. vs. PL<br>[15,45] |
| <b>Diseño del ensayo clínico</b>                                 |                                            |                                                   |                                                         |                                           |                                                   |
| Nº de pacientes                                                  | 9.340                                      | 6.068                                             | 9.901                                                   | 14.752                                    | 3.297                                             |
| Tratamiento antidiabético<br>al que se añadió<br>el AR-GLP-1     | Tratamiento estándar                       | Tratamiento estándar<br>(tras un SCA<br>reciente) | 1-2 antidiabéticos orales<br>± insulina basal           | Tratamiento estándar                      | Tratamiento estándar                              |
| Duración del tratamiento                                         | Mediana: 3,5 años                          | Mediana: 22,4 vs.<br>23,3 meses                   | 82% vs. 83% del tiempo<br>hasta un AACI/<br>seguimiento | Mediana: 27,8 meses                       | 2 años                                            |
| Duración del seguimiento                                         | 3,5-5 años                                 | Mediana: 25,8 vs.<br>23,3 meses                   | Mediana: 5,4 años                                       | Mediana: 38,7 meses                       |                                                   |
| <b>AACI y sus componentes</b>                                    |                                            |                                                   |                                                         |                                           |                                                   |
| Criterio compuesto <sup>a</sup><br>(% pac. [HR; IC 95%])         | <b>13,0 vs. 14,9 (0,87;<br/>0,78-0,97)</b> | 13,4 vs. 13,2 (1,02;<br>0,89-1,17)                | <b>12,0 vs. 13,4 (0,88;<br/>0,79-0,99)</b>              | 11,4 vs. 12,2 (0,91;<br>0,83-1,00)        | <b>6,6 vs. 8,9 (0,74;<br/>0,58-0,95)</b>          |
| Muerte por causa CV<br>(% pac. [HR; IC 95%])                     | <b>4,7 vs. 6,0 (0,78;<br/>0,66-0,93)</b>   | 5,1 vs. 5,2 (0,98;<br>0,78-1,22)                  | 6,4 vs. 7,0 (0,91;<br>0,78-1,06) <sup>b</sup>           | 4,6 vs. 5,2 (0,88;<br>0,76-1,02)          | 2,7 vs. 2,8 (0,98;<br>0,65-1,48)                  |
| Ictus no mortal<br>(% de pcts.<br>[HR; IC 95%])                  | 3,4 vs. 3,8 (0,89;<br>0,72-1,11)           | 2,2 vs. 2,0 (1,12;<br>0,79-1,58)                  | <b>2,7 vs. 3,5 (0,76;<br/>0,61-0,95)</b>                | 2,5 vs. 2,9 (0,85;<br>0,70-1,03)          | <b>1,6 vs. 2,7 (0,61;<br/>0,38-0,99)</b>          |
| Infarto de miocardio<br>no mortal (% pac.<br>[HR; IC 95%])       | 6,0 vs. 6,8 (0,88;<br>0,75-1,03)           | 8,9 vs. 8,6 (1,03;<br>0,87-1,23)                  | 4,1 vs. 4,3 (0,96;<br>0,79-1,16)                        | 6,6 vs. 6,7 (0,97;<br>0,85-1,10)          | 2,9 vs. 3,9 (0,74;<br>0,51-1,08)                  |
| Hospitalización por<br>angina inestable<br>(% pac. [HR; IC 95%]) |                                            | 0,4 vs. 0,3 (1,11;<br>0,47-2,62)                  |                                                         |                                           |                                                   |
| <b>Otros criterios de valoración secundarios</b>                 |                                            |                                                   |                                                         |                                           |                                                   |
| Muerte por cualquier<br>causa (% pac.<br>[HR; IC 95%])           | <b>8,2 vs. 9,6 (0,85;<br/>0,74-0,97)</b>   |                                                   | 10,8 vs. 12,0 (0,90;<br>0,80-1,01)                      | <b>6,9 vs. 7,9 (0,86;<br/>0,77-0,97)</b>  | 3,8 vs. 3,6 (1,05;<br>0,74-1,50)                  |

Resultados de la serie completa de análisis (liraglutida, dulaglutida y semaglutida) o la población de análisis por intención de tratar (exenatida LP y lixisenatida). Los valores en negrita indican diferencias entre tratamientos significativas a favor del AR-GLP-1 sobre PL

CV: cardiovascular; HR: hazard ratio; LP: liberación prolongada; PL: placebo; pac.: pacientes; SCA: síndrome coronario agudo; sem.: semana

<sup>a</sup>Criterio de valoración principal: tiempo desde la aleatorización hasta la primera aparición de uno de los componentes del AACI

<sup>b</sup>También incluyó muertes por causa desconocida

añade un AR-GLP-1 a un régimen previo, puede ser necesario reducir la dosis de insulina o del secretagogo de insulina para disminuir la posibilidad de episodios hipoglucémicos [4-16].

Aunque muchas RFA parecen ser efectos de clase, los perfiles de tolerabilidad de cada AR-GLP-1 muestran diferencias en la estructura y duración del efecto respecto a algunas de estas reacciones, especialmente a las RFA gastrointestinales y las reacciones en el lugar de la inyección (Tabla 5) [19,49,50].

En los ECA de comparación directa solo se observaron diferencias significativas en las tasas de RFA gastrointestinales con liraglutida frente a exenatida LP [65] y con exenatida LI frente a dulaglutida 0,75 (pero no 1,5) mg/semana [53]. Un metanálisis no encontró diferencias significativas en las tasas de náuseas e interrupción debido a las RFA entre exenatida LP y dulaglutida, exenatida LI, liraglutida y

lixisenatida como terapias adyuvantes a metformina [66]. Otro metanálisis mostró que los AR-GLP-1 administrados una vez a la semana (datos de semaglutida no incluidos) presentaban un riesgo similar de diarrea, pero el riesgo de náuseas fue mayor con dulaglutida que con exenatida LP [23]. En un ECA de comparación directa, la tasa de náuseas fue mayor con semaglutida 1,0 mg/semana que con dulaglutida 1,5 mg/semana (83,2 vs. 45,4/100 paciente-años), pero el porcentaje de todas las RFA gastrointestinales fue similar (43% vs. 44% de los pacientes) [32].

La incidencia relativa de reacciones en el lugar de la inyección con los AR-GLP-1 es difícil de determinar, ya que en los ECA su frecuencia y características se registran de manera poco sistemática y faltan análisis estadísticos [19,51]. En los ECA de comparación directa, los pacientes que recibieron exenatida LP mostraron una tasa de reacciones

| Tabla 5 Resumen de los perfiles de tolerabilidad de los agonistas del receptor del péptido similar al glucagón 1 (AR-GLP-1) |                                                                                                                                                                                                                                                                                                                                                                                                                                                                                                                                                                                                                                                                                                                                                                                                                                                                                                              |
|-----------------------------------------------------------------------------------------------------------------------------|--------------------------------------------------------------------------------------------------------------------------------------------------------------------------------------------------------------------------------------------------------------------------------------------------------------------------------------------------------------------------------------------------------------------------------------------------------------------------------------------------------------------------------------------------------------------------------------------------------------------------------------------------------------------------------------------------------------------------------------------------------------------------------------------------------------------------------------------------------------------------------------------------------------|
| Efectos gastrointestinales                                                                                                  | <p>Tipo de RFA más frecuente; mayor frecuencia al inicio del tratamiento, después ↓ gradualmente [19,50-52]</p> <p>No se recomienda su uso en pacientes con enfermedad inflamatoria intestinal o gastroparesia diabética [4-16]</p> <p>Náuseas: muy frecuentes<sup>a</sup> (registradas hasta en el 50% de los pacientes); generalmente de intensidad leve a moderada y dependientes de la dosis [49]</p> <p>AR-GLP-1 de corta duración<sup>b</sup>: ↑ riesgo debido al importante retraso del vaciado gástrico; ↓ lentamente a lo largo de varios meses; puede dar lugar a interrupción del tratamiento (los AR-GLP-1 de larga duración no retrasan el vaciado gástrico; las náuseas se resuelven rápidamente) [19,49,52]</p> <p>Otros acontecimientos frecuentes<sup>a</sup>: dispepsia, estreñimiento, dolor abdominal [52]; los vómitos son más frecuentes con dulaglutida que con exenatida LI [53]</p> |
| Efectos cardiovasculares                                                                                                    | <p>Sin ↑ significativo del riesgo de efectos cardiovasculares (Sec. 5) [44,48,54-56]</p> <p>Puede causar un pequeño ↑ de la frecuencia cardíaca (2,1-3,3 latidos/min) y una ↓ moderada de la presión arterial sistólica (1,8-4,6 mm Hg) vs. PL [56]</p> <p>Sin ↑ significativo de las tasas de hipertensión [56], fibrilación auricular [55] o insuficiencia cardíaca [54]; sin efecto sobre el intervalo QT [49]</p>                                                                                                                                                                                                                                                                                                                                                                                                                                                                                        |
| Efectos microvasculares                                                                                                     | <p>Retinopatía diabética: ↑ riesgo de empeoramiento temprano con semaglutida (compatible con el empeoramiento temprano que se produce con insulina; asociado a mejoras rápidas e importantes del control glucémico) [57], pero no con otros AR-GLP-1 [58,59]</p> <p>Nefropatía: ↓ riesgo [58,59]</p>                                                                                                                                                                                                                                                                                                                                                                                                                                                                                                                                                                                                         |
| Niveles lipídicos                                                                                                           | <p>Exenatida LI/LP, liraglutida y lixisenatida dieron lugar en general a una pequeña ↓ del colesterol-HDL (0,06–0,13 mmol/L), el colesterol-LDL (0,08–0,16 mmol/L) y el colesterol total (0,16–0,27 mmol/L) [60]</p>                                                                                                                                                                                                                                                                                                                                                                                                                                                                                                                                                                                                                                                                                         |
| Inmunogenicidad y reacciones alérgicas                                                                                      | <p>El potencial de producción de anticuerpos es mayor con los AR-GLP-1 cuya estructura se basa en la extendina-4, ya que son menos homólogos del GLP-1 humano que los basados en el propio GLP-1 humano (Tabla 1) [19,49]</p> <p>Incidencia de formación de anticuerpos: ≈ 45% de los pacientes tratados con exenatida LI y LP, 70% con lixisenatida, 9% con liraglutida y ≈ 1–2% con dulaglutida y semaglutida [4-16]</p> <p>Los anticuerpos tienen poco impacto sobre la eficacia, con la posible excepción de los pacientes con un título de anticuerpos elevado [19,49]</p> <p>Reacciones anafilácticas graves: infrecuentes<sup>a</sup> con lixisenatida; raras<sup>a</sup> con liraglutida y muy raras<sup>a</sup> con exenatida</p> <p>Casos raros<sup>a</sup> de prurito, urticaria y angioedema [49]</p>                                                                                            |
| Reacciones en el lugar de la inyección                                                                                      | <p>RFA frecuentes<sup>a</sup> debido a la inyección subcutánea; normalmente se presentan como prurito en el lugar de la inyección; suelen ser leves y transitorias; pueden ser más frecuentes en pacientes que desarrollan anticuerpos frente al fármaco [19,49,50]</p> <p>Los pacientes tratados con exenatida LP pueden presentar pequeños bultos (diámetro generalmente &lt; 0,05 cm) en el abdomen debido a las microesferas de polímero presentes en la formulación; estos bultos suelen desaparecer en 4-8 semanas, no son sintomáticos y no requieren la interrupción del tratamiento [12-14]</p>                                                                                                                                                                                                                                                                                                     |
| Hipoglucemia                                                                                                                | <p>AR-GLP-1 solo o + metformina: no ↑ el riesgo de hipoglucemia [49]</p> <p>AR-GLP-1 + sulfonilurea ± metformina o + insulina ↑ el riesgo de hipoglucemia, aunque el riesgo global sigue siendo bajo [49]</p> <p>Es recomendable ↓ la dosis de sulfonilurea o insulina al iniciar el AR-GLP-1 para ↓ el riesgo de hipoglucemia</p>                                                                                                                                                                                                                                                                                                                                                                                                                                                                                                                                                                           |
| Daño renal agudo                                                                                                            | <p>Probablemente causado por la reducción de volumen y la deshidratación debido a los síntomas gastrointestinales [61]</p> <p>Registrado con exenatida LI/LP y liraglutida; sin relación causal con la nefritis intersticial aguda [19,49]</p> <p>Es recomendable evitar el uso de AR-GLP-1 en pacientes con diabetes tipo 2 no controlada, poliuria o polidipsia, o en pacientes que presentan síntomas gastrointestinales graves (p. ej., vómitos y diarrea) o que están recibiendo fármacos que predisponen a la depleción de volumen (p. ej., inhibidores del sistema renina-angiotensina) [20,49]</p>                                                                                                                                                                                                                                                                                                   |
| Pancreatitis y cáncer de páncreas                                                                                           | <p>Los datos actuales no respaldan la existencia de una relación entre estas patologías y los fármacos basados en incretinas [62,63]</p> <p>Como medida de precaución, no deben administrarse AR-GLP-1 a los pacientes con cáncer de páncreas o pancreatitis aguda [20,49,51]</p>                                                                                                                                                                                                                                                                                                                                                                                                                                                                                                                                                                                                                            |
| Tumores tiroideos de células C                                                                                              | <p>Los AR-GLP-1 causaron tumores tiroideos de células C en estudios en roedores con exposiciones clínicamente relevantes, pero no en primates. Se desconoce si los AR-GLP-1 causan tumores tiroideos de células C (incluido el carcinoma tiroideo medular) en humanos (es probable que la pertinencia de los estudios de roedores sea baja en los humanos, pero no se puede excluir) [4-16]</p> <p>EE.UU.: su uso está contraindicado (recuadro negro de advertencia) para los pacientes con historial personal o familiar de carcinoma tiroideo medular, o con neoplasia endocrina múltiple tipo 2 [5,7,9,11,13,14,16]</p>                                                                                                                                                                                                                                                                                  |
| Otros                                                                                                                       | <p>Infecciones y cefalea: registradas frecuentemente en ECA, pero sin asociación causal con el tratamiento con AR-GLP-1 [49]</p> <p>↑ riesgo de fracturas óseas: relacionado con exenatida pero no con liraglutida [64]; existe controversia sobre la causalidad [49]</p> <p>UE: ↑ riesgo de RFA tiroideas (p. ej., bocio); registrado en ECA, especialmente en pacientes con patología tiroidea previa; en estos pacientes debe usarse con precaución [4,6,8,10,12,15]</p>                                                                                                                                                                                                                                                                                                                                                                                                                                  |

ECA: ensayo clínico controlado y aleatorizado; LI: liberación inmediata; PL: placebo; pac.: pacientes; RFA: reacción farmacológica adversa; ↑: aumento; ↓: disminución

<sup>a</sup>RFA muy frecuentes registradas en ≥ 10% de los pacientes; frecuentes en ≥ 1% a < 10%; raras en ≥ 0,1% a < 1%; y muy raras en ≥ 0,01% a < 0,1%

<sup>b</sup>Exenatida LI y lixisenatida son de corta duración; liraglutida, dulaglutida, exenatida LP y semaglutida son de larga duración

en el lugar de la inyección mayor que los que recibieron exenatida LI [12-14], mientras que los pacientes tratados con semaglutida mostraron una tasa de reacciones en el lugar de la inyección menor que los tratados con exenatida LP [31]. Las tasas de reacciones en el lugar de la inyección fueron similares con dulaglutida y liraglutida [67], así como con dulaglutida y semaglutida [32].

Con algunas excepciones, normalmente no es necesario cambiar la dosis en pacientes con insuficiencia hepática o insuficiencia renal leve (Tabla 6). Sin embargo, debido a la escasez de datos, el uso de AR-GLP-1 en pacientes con insuficiencia renal más grave generalmente requiere precaución o no se recomienda (Tabla 6). No se necesitan cambios de dosis en función de la edad (los datos de pacientes  $\geq 70$  o 75 años son limitados), pero el tratamiento en ancianos debe tener en cuenta cualquier insuficiencia renal relacionada con la edad. No se recomienda utilizar AR-GLP-1 en mujeres embarazadas o en periodo de lactancia. También deben tomarse precauciones en pacientes con riesgo de insuficiencia renal aguda, pancreatitis o patología tiroidea (Tabla 5).

## 7 Indicaciones autorizadas de los AR-GLP-1

Seis formulaciones de AR-GLP-1 (exenatida LI dos veces al día, liraglutida y lixisenatida una vez al día, y dulaglutida, exenatida LP y semaglutida una vez a la semana) han sido autorizadas para el tratamiento de la DM2 en la UE y/o los EE.UU. (Tabla 6) [4-16]. Todas ellas están indicadas como terapia adyuvante a la dieta y el ejercicio para mejorar el control glucémico en adultos con DM2 en combinación con otros fármacos hipoglucemiantes (incluida la insulina) cuando el paciente no logra un control glucémico adecuado con el tratamiento recibido + dieta/ejercicio. Algunos AR-GLP-1 también están indicados como terapia adyuvante a la dieta y el ejercicio como monoterapia, o como monoterapia cuando el uso de metformina se considera inapropiado debido a intolerancia o contraindicaciones (Tabla 6) [4-16].

Todos los AR-GLP-1 se inyectan por vía subcutánea en el abdomen, el muslo o la parte superior del brazo, utilizando una localización diferente para cada inyección dentro de la misma región [4-16]. Su uso difiere en relación con algunos parámetros, como la dosificación, la administración o la preparación de la dosis (Tabla 6) [4-16].

## 8 Lugar que ocupan actualmente los AR-GLP-1 en la práctica clínica

Las guías de tratamiento actuales recomiendan los AR-GLP-1 como opción para el manejo de la DM2, habitualmente como terapia adyuvante en pacientes que no alcanzan los objetivos glucémicos con las intervenciones sobre el

estilo de vida más metformina y otros fármacos hipoglucemiantes [1,2]. Como clase, los AR-GLP-1 ofrecen algunas ventajas potenciales respecto a otras clases de fármacos hipoglucemiantes. La administración de un AR-GLP-1 dio lugar a una mejora igual, o incluso superior, de los resultados relacionados con el control glucémico y la pérdida de peso, que la administración de metformina, sulfonilureas, inhibidores de DPP-4, tiazolidinedionas, inhibidores de SGLT2 o insulinas de acción rápida y prolongada (Sec. 3). Los efectos beneficiosos de los AR-GLP-1 sobre el control glucémico (incluyendo el bajo riesgo intrínseco de hipoglucemia) y la pérdida de peso se asocian a mejoras en las variables comunicadas por los pacientes sobre su satisfacción con el tratamiento de la diabetes, la percepción del peso y la percepción de frecuencia de hiperglucemia e hipoglucemia (Secc. 4).

Generalmente, los AR-GLP-1, los inhibidores de SGLT2, los inhibidores de DPP-4 y las tiazolidinedionas se recomiendan como opciones adyuvantes a la terapia del paciente en el mismo paso de las guías de tratamiento [1,2]. Aunque tanto los AR-GLP-1 como los inhibidores de DPP-4 son terapias basadas en incretinas, los AR-GLP-1 tienen efectos intrínsecos directos sobre el sistema de las incretinas, mientras que los inhibidores de DPP-4 actúan indirectamente evitando la inactivación del GLP-1 endógeno y el polipéptido insulíntrópico dependiente de glucosa (GIP) mediante la inhibición competitiva de la enzima DPP-4 [72-74]. Estas dos clases de fármacos presentan un escaso riesgo de hipoglucemia y aumento de peso, pero los AR-GLP-1 ofrecen un mejor control glucémico y fomentan la pérdida de peso, mientras que los inhibidores de DPP-4 no tienen influencia sobre esta variable. Así pues, si el paciente tiene una necesidad apremiante de perder peso, podría ser preferible tratarlo con un AR-GLP-1 o un inhibidor de SGLT2 (que también fomenta la pérdida de peso) antes que con un inhibidor de DPP-4. Si el peso no es un problema, o si el paciente prefiere la administración oral o no tolera los AR-GLP-1, en ocasiones puede ser mejor optar por un inhibidor de DPP-4.

El tratamiento con un AR-GLP-1 o un inhibidor de SGLT2 con beneficios CV demostrados también puede ser preferible a otras opciones en pacientes con riesgo de complicaciones CV ateroscleróticas [2]. En los ECA de AR-GLP-1 que evalúan variables CV, semaglutida, dulaglutida y liraglutida redujeron significativamente el riesgo de AACI (en un 26%, un 13% y un 12%, respectivamente) y exenatida LP y lixisenatida al menos no lo aumentaron (Tabla 4). Estos datos son importantes porque en el tratamiento de la DM2 deben tenerse en cuenta otros aspectos de la DM2, además del control glucémico. Actualmente la evidencia sobre la eficacia reductora de las complicaciones CV es mayor para liraglutida, seguida de semaglutida y después de exenatida LP [2]. Hay que señalar que los inhibidores de SGLT2 también han mostrado beneficios CV en comparación con placebo y otros hipoglucemiantes orales

| Tabla 6 Características seleccionadas de los agonistas del receptor del péptido similar al glucagón 1 (AR-GLP-1) [4-16] |                                                                 |                                                 |                                                                    |                                    |                                          |
|-------------------------------------------------------------------------------------------------------------------------|-----------------------------------------------------------------|-------------------------------------------------|--------------------------------------------------------------------|------------------------------------|------------------------------------------|
| Parámetro                                                                                                               | Dos veces al día                                                | Una vez al día                                  | Una vez a la semana                                                |                                    |                                          |
|                                                                                                                         | Exenatida [4,5]                                                 | Liraglutida [6,7]                               | Lixisenatida [8,9]                                                 | Dulaglutida [10,11]                | Exenatida [12-14]                        |
| Semaglutida [15,16]                                                                                                     |                                                                 |                                                 |                                                                    |                                    |                                          |
| <b>Detalles de la autorización</b>                                                                                      |                                                                 |                                                 |                                                                    |                                    |                                          |
| Nombre comercial                                                                                                        | Byetta®                                                         | Victoza®a                                       | Lyxumia®b (UE); Adyxin®b (EE.UU.)                                  | Trulicity®                         | Bydureon®/Bydureon® BCise®c              |
| Autorización inicial                                                                                                    | 2009                                                            | 2009                                            | 2013                                                               | 2014                               | 2011/2017                                |
| Monoterapia                                                                                                             | ✓                                                               | ✓d                                              | ✗ UE; ✓ EE.UU.                                                     | ✓d UE; ✗ EE.UU.                    | ✗                                        |
| Terapia combinada                                                                                                       | ✓                                                               | ✓                                               | ✓                                                                  | ✓                                  | ✓d                                       |
| <b>Dosificación y administración</b>                                                                                    |                                                                 |                                                 |                                                                    |                                    |                                          |
| Dosis inicial                                                                                                           | 5 µg dos veces al día                                           | 0,6 mg/día                                      | 10 µg/día                                                          | 0,75 o 1,5 mg/sem.º                | 2 mg/sem.                                |
| ↑ dosis                                                                                                                 | Se puede ↑ hasta 10 µg dos veces al día después de ≥ 1 mes      | Se puede ↑ hasta 1,2 mg/día después de ≥ 1 sem. | Se debe ↑ hasta 20 µg/día a los 15 días                            | Se puede ↑ hasta 1,5 mg/sem.       | Se debe ↑ hasta 0,5 mg/sem. a las 4 sem. |
| ↑ más si es necesario                                                                                                   |                                                                 | 1,8 mg después de ≥ 1 sem.                      |                                                                    |                                    | 1 mg/sem. después de ≥ 4 sem.            |
| Restricciones de administración en relación a las comidas                                                               | ✓: ≤ 1 h antes de 2 comidas principales con ≥ 6 h de separación | ✗; aproximadamente a la misma hora cada día     | ✓: ≤ 1 h antes de cualquier comida (UE) o de la 1ª comida (EE.UU.) | ✗; el mismo día cada sem.          | ✗; el mismo día cada sem.                |
| Dosis disponibles/pluma (nº de dosis/pluma)                                                                             | 300 µg (60 × 5 µg)                                              | 18 mg (10 × 1,8; 15 × 1,2 o 30 × 0,6 mg)        | 140 µg/pluma (14 × 10 µg)                                          | 0,75 mg (1 × 0,75 mg)              | 2 mg (4 × 0,25 o 0,5 mg)                 |
|                                                                                                                         | 600 µg (60 × 10 µg)                                             |                                                 | 280 µg/pluma (14 × 20 µg)                                          | 1,5 mg (1 × 1,5 mg)                | 4 mg (4 × 1 mg)                          |
| <b>Requisitos para la preparación de la dosis</b>                                                                       |                                                                 |                                                 |                                                                    |                                    |                                          |
| Reconstituir o mezclar                                                                                                  | ✗                                                               | ✗                                               | ✗                                                                  | ✗                                  | ✗                                        |
| Cargar el dispositivo antes de su uso                                                                                   | ✓                                                               | ✓                                               | ✓                                                                  | ✗                                  | ✓                                        |
| Seleccionar la dosis                                                                                                    | ✓                                                               | ✓                                               | ✓                                                                  | ✗                                  | ✓                                        |
| Colocar la aguja (está incluida)                                                                                        | ✓ (✗)                                                           | ✓ (✗)                                           | ✓ (✗)                                                              | ✗ (✓ AIE)                          | ✓ (✗) (✓ AIE)                            |
| <b>Almacenamiento</b>                                                                                                   |                                                                 |                                                 |                                                                    |                                    |                                          |
| Antes de su uso                                                                                                         | 2-8 °C                                                          | 2-8 °C o < 30 °C durante ≤ 1 mes                | 2-8 °C                                                             | 2-8 °C o < 30 °C durante ≤ 14 días | 2-8 °C                                   |
| Después del 1º uso                                                                                                      | < 25 °C                                                         | 2-8 °C o < 30 °C                                | < 30 °C                                                            | NA                                 | 2-8 °C o < 30 °C                         |
| Fecha de eliminación después de la 1ª dosis                                                                             | 30 días                                                         | 30 días                                         | 14 días                                                            | NA                                 | 6 sem. en la UE; 8 sem. en EE.UU.        |
| <b>Uso en pacientes con insuficiencia renal</b>                                                                         |                                                                 |                                                 |                                                                    |                                    |                                          |
| Leve                                                                                                                    | ✓                                                               | ✓                                               | ✓                                                                  | ✓                                  | ✓                                        |
| Moderada                                                                                                                | ↑ dosis con precaución                                          | ✓                                               | ✓                                                                  | ↑ dosis con precaución             | ✓                                        |
| Grave                                                                                                                   | NRC                                                             | ✓                                               | NRC                                                                | ✓                                  | ✓                                        |
| Enfermedad renal terminal                                                                                               | NRC                                                             | NRC                                             | NRC                                                                | NRC en la UE; precaución en EE.UU. | NRC                                      |
| <b>Uso en pacientes con insuficiencia hepática</b>                                                                      |                                                                 |                                                 |                                                                    |                                    |                                          |
| Leve a moderada                                                                                                         | ✓                                                               | ✓                                               | ✓                                                                  | ✓ UE; precaución en EE.UU.         | ✓                                        |
| Grave                                                                                                                   | ✓                                                               | NRC                                             | ✓                                                                  | ✓ UE; precaución en EE.UU.         | Precaución                               |

Si no se indica otra cosa, los detalles corresponden a la UE y EE.UU. Todos los AR-GLP-1 se utilizan como terapia adyuvante al ejercicio y la dieta

A/E: aguja incluida escondida; NA: no aplicable; NRC: no recomendado; sem.: semana; ✓: autorizado/requerido; ✗: no autorizado/no requerido

aTambién disponible como combinación a dosis fija una vez al día con insulina degludec (Xultophy®) [68,69]

bTambién disponible como combinación a dosis fija una vez al día con insulina glargina (Suliqua® en la UE) [70]; Soliqua® en EE.UU. [71])

cSi no se indica otra cosa, se refiere tanto a Bydureon en inyección como a Bydureon® BCise en pluma precargada

dSi no se puede utilizar metformina debido a intolerancia o contraindicaciones

º0,75 mg/sem es la dosis inicial para la monoterapia y las poblaciones potencialmente vulnerables (es decir, pacientes ≥ 75 años) en la UE y para la terapia combinada en EE.UU.; 1,5 mg/sem es la dosis inicial para la terapia combinada en la UE



(es decir, metformina, sulfonilureas, tiazolidinedionas e inhibidores de DPP-4) [75] y que la evidencia es moderadamente más sólida con empagliflozina que con canagliflozina [2]. En pacientes en los que predomina la insuficiencia cardíaca o la insuficiencia renal crónica (IRC), el tratamiento con un inhibidor de SGLT2 que haya demostrado reducir la insuficiencia cardíaca o la IRC es preferible si la función renal es adecuada; además se puede añadir un AR-GLP-1 con beneficios CV demostrados si el inhibidor de SGLT2 no se tolera o está contraindicado, o si la función renal no es adecuada [2].

En pacientes sin IRC o patología CV aterosclerótica establecida y cuando el coste del tratamiento hipoglucemiante es una cuestión importante, generalmente se prefiere añadir a la metformina una sulfonilurea o una tiazolidinediona, en lugar de un AR-GLP-1, un inhibidor de SGLT2 o un inhibidor de DPP-4, reservándose la adición de las clases más recientes (y más caras) para las siguientes líneas de tratamiento (considerando el tratamiento con el fármaco de menor coste) [2].

Los AR-GLP-1 se administran por vía subcutánea, lo cual supone una desventaja respecto a la administración oral, más cómoda, de la mayoría de las otras clases de hipoglucemiantes. Los resultados clínicos de los pacientes con DM2 son peores si el cumplimiento terapéutico es escaso, lo cual puede resultar especialmente problemático con los hipoglucemiantes inyectables, como los AR-GLP-1 o la insulina. Los problemas relacionados con la inyección (dolor, miedo a las agujas, tamaño de la aguja) y su carga/incomodidad son barreras habituales para el uso y continuación del tratamiento hipoglucemiante inyectable [76]. Algunos pacientes pueden preferir los AR-GLP-1 que se administran una vez a la semana (dulaglutida, exenatida LP y semaglutida) frente a los AR-GLP-1 que se administran una o dos veces al día.

Por el momento, ningún AR-GLP-1 ha demostrado ser claramente superior a cualquiera de los otros AR-GLP-1. En cualquier caso, todos los AR-GLP-1 de larga duración reducen los niveles de glucosa durante el intervalo de dosificación de 1 día o 1 semana (Sec. 3) y pueden ofrecer algunos beneficios clínicos a determinados pacientes. En los meta-análisis, las mejoras del control glucémico fueron superiores con los AR-GLP-1 de larga duración que con los de corta duración, aunque ambos redujeron el peso. No se observaron diferencias globales clínicamente significativas entre los diferentes AR-GLP-1 de corta duración. Por el contrario, entre los AR-GLP-1 de larga duración, semaglutida fue significativamente más efectiva para reducir los niveles de HbA<sub>1c</sub> y reducir el peso que los otros AR-GLP-1 de administración semanal (dulaglutida y exenatida LP; Tabla 2).

En general, los AR-GLP-1 son bien tolerados (Sec. 5), pero las RFA gastrointestinales habituales pueden ser molestas y dar lugar a la interrupción del tratamiento. Estos acontecimientos suelen ser transitorios y su frecuencia disminuye

en unas pocas semanas o meses. Un ajuste de dosis más gradual puede ayudar a reducir su frecuencia e intensidad. Las reacciones en el lugar de la inyección también son frecuentes, pero transitorias, y pueden ser más habituales en pacientes con títulos relativamente altos de anticuerpos contra el AR-GLP-1. Los datos comparativos de la práctica clínica real podrían ayudar a aclarar la efectividad, tolerabilidad y aceptación relativa de esta clase farmacológica.

Antes de introducir estos fármacos como adyuvantes a la terapia basada en la modificación del estilo de vida ± otros hipoglucemiantes deben tenerse en cuenta las diferencias en los perfiles de farmacología, efectividad, tolerabilidad y administración de los AR-GLP-1, así como las preferencias de los pacientes. Es preciso asesorar a los pacientes sobre el uso correcto del dispositivo del AR-GLP-1, así como sobre las posibles RFA relacionadas con el tratamiento y su manejo. Si se utilizan adecuadamente, los AR-GLP-1 son fármacos hipoglucemiantes útiles y efectivos, especialmente en aquellos pacientes que presentan dificultades para controlar la DM2 con dieta/ejercicio ± metformina y otros hipoglucemiantes.

**Agradecimientos** El autor desea manifestar su agradecimiento al profesor John Wilding, Obesity & Endocrinology Research, Institute of Ageing & Chronic Disease, Universidad de Liverpool, Liverpool, Reino Unido, por la ayuda prestada en la preparación de esta revisión.

## Cumplimiento de las normas éticas

**Financiación** La preparación de esta revisión no ha contado con el apoyo de ninguna fuente de financiación externa.

**Conflictos de intereses** K.A. Lyseng-Williamson es un empleado de Adis International/Springer Nature; es responsable del contenido del artículo y declara no tener ningún conflicto de intereses.

**Acceso abierto** Este artículo se autoriza conforme a lo establecido en la licencia internacional Creative Commons Attribution-NonCommercial 4.0. (<http://creativecommons.org/licenses/by-nc/4.0/>), que permite el uso, divulgación, adaptación, distribución y reproducción no comercial en cualquier medio o formato, siempre que otorgue el crédito adecuado a los autores del original y a la fuente, proporcione un enlace a la licencia Creative Commons e indique si se han hecho cambios.

## Referencias bibliográficas

1. International Diabetes Federation. IDF clinical practice recommendations for managing type 2 diabetes in primary care. Brussels: International Diabetes Federation; 2017.
2. American Diabetes Association. 9. Pharmacological approaches to glycemic treatment: standards of medical care in diabetes—2019. *Diabetes Care*. 2019;42(Suppl 1):S90–102.
3. Ahren B. Glucagon-like peptide-1 receptor agonists for type 2 diabetes: a rational drug development. *J Diabetes Investig*. 2018. <https://doi.org/10.1111/jdi.12911>.
4. Byetta (exenatide) solution for injection in prefilled-pen: EU summary of product characteristics. Södertälje: AstraZeneca AB; 2018.
5. Byetta (exenatide) injection: US prescribing information. Wilmington: AstraZeneca Pharmaceuticals LP; 2018.

6. Victoza (liraglutide) 6 mg/ml solution for injection in pre-filled pen: EU summary of product characteristics. Bagsværd: Novo Nordisk A/S; 2018.
7. Victoza (liraglutide) injection, for subcutaneous use: US prescribing information. Plainsboro: Novo Nordisk Inc.; 2018.
8. Lyxumia (lixisenatide) 10 and 20 micrograms solution for injection: EU summary of product characteristic. Paris: Sanofi-aventis Groupe; 2017.
9. Adlyxin (lixisenatide) injection, for subcutaneous use: US prescribing information. Bridgewater Sanofi-Aventis U.S. LLC; 2019.
10. Trulicity (dulaglutide) 0.75 and 1.5 mg solution for injection in pre-filled pen: EU summary of product characteristics. Utrecht: Eli Lilly Nederland B.V.; 2018.
11. Trulicity (dulaglutide) injection for subcutaneous use: US prescribing information. Indianapolis: Eli Lilly and Company; 2019.
12. Bydureon 2 mg prolonged-release suspension for injection (Ipowder and solvent; pre-filled pen and BCise): EU summary of product characteristics. Södertälje (Sweden): AstraZeneca AB; 2019.
13. Bydureon® (exenatide extended-release) for injectable suspension, for subcutaneous use: US prescribing information. Wilmington (DE): AstraZeneca Pharmaceuticals LP; 2018.
14. Bydureon® BCise™ (exenatide extended-release) injectable suspension, for subcutaneous use: US prescribing information. Wilmington (DE): AstraZeneca Pharmaceuticals LP; 2019.
15. Ozempic (semaglutide) 0.25, 0.5 and 1 mg solution for injection in pre-filled pen: EU summary of product characteristics. Bagsværd: Novo Nordisk A/S; 2018.
16. Ozempic (semaglutide) injection 0.5 mg/1 mg: US prescribing information. Plainsboro: Novo Nordisk Inc.; 2017.
17. Sposito AC, Berwanger O, de Carvalho LSF, et al. GLP-1RAs in type 2 diabetes: mechanisms that underlie cardiovascular effects and overview of cardiovascular outcome data. *Cardiovasc Diabetol.* 2018;17(1):157. <https://doi.org/10.1186/s12933-018-0800-2>.
18. Sharma D, Verma S, Vaidya S, et al. Recent updates on GLP-1 agonists: current advancements and challenges. *Biomed Pharmacother.* 2018;108:952–62.
19. Gentilella R, Pechtnr V, Corcos A, et al. Glucagon-like peptide-1 receptor agonists in type 2 diabetes treatment: are they all the same? *Diabetes Metab Res Rev.* 2019;35:e3070. <https://doi.org/10.1002/dmrr.3070>.
20. Sfairopoulos D, Liatis S, Tigas S, et al. Clinical pharmacology of glucagon-like peptide-1 receptor agonists. *Hormones (Athens).* 2018;17(3):333–50.
21. Sun F, Wu S, Gou S, et al. Effect of GLP-1 receptor agonists on waist circumference among type 2 diabetes patients: a systematic review and network meta-analysis. *Endocrine.* 2015;48(3):794–803.
22. Madsbad S. Review of head-to-head comparisons of glucagon-like peptide-1 receptor agonists. *Diabetes Obes Metab.* 2016;18:317–32.
23. Hitke ZZ, Zaccardi F, Papamargaritis D, et al. Efficacy and safety of glucagon-like peptide-1 receptor agonists in type 2 diabetes: a systematic review and mixed-treatment comparison analysis. *Diabetes Obes Metab.* 2017;19(4):524–36.
24. Unni S, Wittbrodt E, Ma J, et al. Comparative effectiveness of once-weekly glucagon-like peptide-1 receptor agonists with regard to 6-month glycaemic control and weight outcomes in patients with type 2 diabetes. *Diabetes Obes Metab.* 2018;20(2):468–73.
25. Yu M, Van Brunt K, Varnado OJ, et al. Patient-reported outcome. Results in patients with type 2 diabetes treated with once-weekly dulaglutide: data from the AWARD phase III clinical trial programme. *Diabetes Obes Metab.* 2016;18(4):419–24.
26. Best JH, Boye KS, Rubin RR, et al. Improved treatment satisfaction and weight-related quality of life with exenatide once weekly or twice daily. *Diabet Med.* 2009;26(7):722–8.
27. Best JH, Rubin RR, Peyrot M, et al. Weight-related quality of life, health utility, psychological well-being, and satisfaction with exenatide once weekly compared with sitagliptin or pioglitazone after 26 weeks of treatment. *Diabetes Care.* 2011;34(2):314–9.
28. Rodbard HW, Lingvay I, Reed J, et al. Semaglutide added to basal insulin in type 2 diabetes (SUSTAIN 5): a randomized, controlled trial. *J Clin Endocrinol Metab.* 2018;103(6):2291–301.
29. Ahrén B, Masmiquel L, Kumar H, et al. Efficacy and safety of once-weekly semaglutide versus once-daily sitagliptin as an add-on to metformin, thiazolidinediones, or both, in patients with type 2 diabetes (SUSTAIN 2): a 56-week, double-blind, phase 3a, randomised trial. *Lancet Diabetes Endocrinol.* 2017;5(5):341–54.
30. Aroda VR, Bain SC, Cariou B, et al. Efficacy and safety of once-weekly semaglutide versus once-daily insulin glargine as add-on to metformin (with or without sulfonylureas) in insulin-naïve patients with type 2 diabetes (SUSTAIN 4): a randomised, open-label, parallel-group, multicentre, multinational, phase 3a trial. *Lancet Diabetes Endocrinol.* 2017;5(5):355–66.
31. Ahmann AJ, Capehorn M, Charpentier G, et al. Efficacy and safety of once-weekly semaglutide versus exenatide ER in subjects with type 2 diabetes (SUSTAIN 3): a 56-week, open-label, randomized clinical trial. *Diabetes Care.* 2017. <https://doi.org/10.2337/dc17-0417>.
32. Pratley R, Aroda V, Lingvay I, et al. Semaglutide versus dulaglutide once weekly in patients with type 2 diabetes (SUSTAIN 7): a randomised, open-label, phase 3b trial. *Lancet Diabetes Endocrinol.* 2018;6(4):275–86.
33. Uusinkaus K, Rodbard HW, Van Gaal L, et al. Semaglutide-induced weight loss is associated with improved health-related quality of life and treatment satisfaction [abstract no. 1020-P]. *Diabetes.* 2019;68 (Suppl 1). <https://doi.org/10.2337/db19-1020-P>.
34. Giorgino F, Penformis A, Pechtnr V, et al. Adherence to antihyperglycemic medications and glucagon-like peptide 1-receptor agonists in type 2 diabetes: clinical consequences and strategies for improvement. *Patient Prefer Adherence.* 2018;12:707–19.
35. Nguyen H, Dufour R, Caldwell-Tarr A. Glucagon-like peptide-1 receptor agonist (GLP-1RA) therapy adherence for patients with type 2 diabetes in a Medicare population. *Adv Ther.* 2017;34(3):658–73.
36. Johnston SS, Nguyen H, Felber E, et al. Retrospective study of adherence to glucagon-like peptide-1 receptor agonist therapy in patients with type 2 diabetes mellitus in the United States. *Adv Ther.* 2014;31(11):1119–33.
37. Qiao Q, Ouwens MJ, Grandy S, et al. Adherence to GLP-1 receptor agonist therapy administered by once-daily or once-weekly injection in patients with type 2 diabetes in Germany. *Diabetes Metab Syndr Obes.* 2016;9:201–5.
38. Alatorre C, Fernández Landó L, Yu M, et al. Treatment patterns in patients with type 2 diabetes mellitus treated with glucagon-like peptide-1 receptor agonists: higher adherence and persistence with dulaglutide compared with once-weekly exenatide and liraglutide. *Diabetes Obes Metab.* 2017;19(7):953–61.
39. Heile M, Wyne K, Billings LK, et al. Cardiovascular outcomes with once-weekly GLP-1 RAs: clinical and economic implications. *J Manag Care Spec Pharm.* 2018;24(9-a):S42–52.
40. Bahtiyar G, Pujais-Kury J, Sacerdote A. Cardiovascular effects of different GLP-1 receptor agonists in patients with type 2 diabetes. *Curr Diabetes Rep.* 2018;18(10):92. <https://doi.org/10.1007/s11892-018-1043-z>.
41. Li Y, Rosenbilt PD. Glucagon-like peptide-1 receptor agonists and cardiovascular risk reduction in type 2 diabetes mellitus: is it a class effect? *Curr Cardiol Rep.* 2018;20(11):113. <https://doi.org/10.1007/s11886-018-1051-2>.
42. Torekov SS. Glucagon-like peptide-1 receptor agonists and cardiovascular disease: from LEADER to EXSCEL. *Cardiovasc Res.* 2018;114(10):e70–1.

43. Marso SP, Daniels GH, Brown-Frandsen K, et al. Liraglutide and cardiovascular outcomes in type 2 diabetes. *N Engl J Med*. 2016;375(4):311–22.
44. Gerstein HC, Colhoun HM, Dagenais GR, et al. Dulaglutide and cardiovascular outcomes in type 2 diabetes (REWIND): a double-blind, randomised placebo-controlled trial. *Lancet*. 2019;1:1. [https://doi.org/10.1016/S0140-6736\(19\)31149-3](https://doi.org/10.1016/S0140-6736(19)31149-3).
45. Marso SP, Bain SC, Consoli A, et al. Semaglutide and cardiovascular outcomes in patients with type 2 diabetes. *N Engl J Med*. 2016;375(19):1834–44.
46. Pfeffer MA, Claggett B, Diaz R, et al. Lixisenatide in patients with type 2 diabetes and acute coronary syndrome. *N Engl J Med*. 2015;373(23):2247–57.
47. Holman RR, Bethel MA, Mentz RJ, et al. Effects of once-weekly exenatide on cardiovascular outcomes in type 2 diabetes. *N Engl J Med*. 2017;377(13):1228–39.
48. Bethel MA, Patel RA, Merrill P, et al. Cardiovascular outcomes with glucagon-like peptide-1 receptor agonists in patients with type 2 diabetes: a meta-analysis. *Lancet Diabetes Endocrinol*. 2018;6(2):105–13.
49. Filippatos TD, Panagiotopoulou TV, Elisaf MS. Adverse effects of GLP-1 receptor agonists. *Rev Diabet Stud*. 2014;11(3–4):202–30.
50. Handelsman Y, Wyne K, Cannon A, et al. Glycemic efficacy, weight effects, and safety of once-weekly glucagon-like peptide-1 receptor agonists. *J Manag Care Spec Pharm*. 2018;24(9-a):S14–29.
51. Romera I, Cebrián-Cuenca A, Álvarez-Guisasola F, et al. A review of practical issues on the use of glucagon-like peptide-1 receptor agonists for the management of type 2 diabetes. *Diabetes Ther*. 2019;10:5–19.
52. Sun F, Yu K, Yang Z, et al. Impact of GLP-1 receptors agonists on major gastrointestinal disorders for type 2 diabetes mellitus: a mixed treatment comparison meta-analysis. *Exp Diabetes Res*. 2012;2012:230624.
53. Wysham C, Blevins T, Arakaki R, et al. Efficacy and safety of dulaglutide added onto pioglitazone and metformin versus exenatide in type 2 diabetes in a randomized controlled trial (AWARD-1). *Diabetes Care*. 2014;37(8):2159–67.
54. Filion KB, Azoulay L, Platt RW, et al. A multicenter observational study of incretin-based drugs and heart failure. *N Engl J Med*. 2016;374(12):1145–54.
55. Monami M, Nreu A, Scatena S, et al. Glucagon-like peptide-1 receptor agonists and atrial fibrillation: a systematic review and meta-analysis of randomised controlled trials. *J Endocrinol Investig*. 2017;40(11):1251–8.
56. Sun F, Wu S, Guo S, et al. Impact of GLP-1 receptor agonists on blood pressure, heart rate and hypertension among patients with type 2 diabetes: a systematic review and network meta-analysis. *Diabetes Res Clin Pract*. 2015;110(1):26–37.
57. Vilsboll T, Bain SC, Leiter LA, et al. Semaglutide, reduction in glycated haemoglobin and the risk of diabetic retinopathy. *Diabetes Obes Metab*. 2019;20(4):889–97.
58. Dicembrini I, Nreu B, Scatena A, et al. Microvascular effects of glucagon-like peptide-1 receptor agonists in type 2 diabetes: a meta-analysis of randomized controlled trials. *Acta Diabetol*. 2017;54(10):933–41.
59. Pang B, Zhou H, Kuang H. The potential benefits of glucagon-like peptide-1 receptor agonists for diabetic retinopathy. *Peptides*. 2018;100:123–6.
60. Sun F, Wu S, Wang J, et al. Effect of glucagon-like peptide-1 receptor agonists on lipid profiles among type 2 diabetes: a systematic review and network meta-analysis. *Clin Ther*. 2015;37(1):225–41.
61. Filippatos TD, Elisaf MS. Effects of glucagon-like peptide-1 receptors on renal function. *World J Diabetes*. 2013;4(5):190–201.
62. Egan AG, Blind E, Dunder K, et al. Pancreatic safety of incretin-based drugs: FDA and EMA assessment. *N Engl J Med*. 2014;370(9):794–7.
63. Alves C, Batel-Marques F, Macedo AF. A meta-analysis of serious adverse events reported with exenatide and liraglutide: acute pancreatitis and cancer. *Diabetes Res Clin Pract*. 2012;98(2):271–84.
64. Su B, Sheng H, Zhang M, et al. Risk of bone fractures associated with glucagon-like peptide-1 receptor agonists' treatment: a meta-analysis of randomized controlled trials. *Endocrine*. 2015;48(1):107–15.
65. Buse JB, Nauck M, Forst T, et al. Exenatide once weekly versus liraglutide once daily in patients with type 2 diabetes (DURATION-6): a randomised, open-label study. *Lancet*. 2013;381(9861):117–24.
66. Kayaniyl S, Lozano-Ortega G, Bennet HA, et al. A network meta-analysis comparing exenatide once weekly with other GLP-1 receptor agonists for the treatment of type 2 diabetes mellitus. *Diabetes Ther*. 2016;7(1):27–43.
67. Dungan KM, Povedano ST, Forst T, et al. Once-weekly dulaglutide versus once-daily liraglutide in metformin-treated patients with type 2 diabetes (AWARD-6): a randomised, open-label, phase 3, non-inferiority trial. *Lancet*. 2014;384(9951):1349–57.
68. Xultophy (insulin degludec 100 units/mL + liraglutide 3.6 mg/mL) solution for injection in pre-filled pen: EU summary of product characteristics. Bagsværd: Novo Nordisk A/S; 2018.
69. Xultophy 110/3.6 (insulin degludec and liraglutide injection), for subcutaneous use: US prescribing information. Plainsboro: Novo Nordisk Inc.; 2019.
70. Suliqua 100/33 (insulin glargine 100 units/ml +lixisenatide 33 or 50 micrograms/ml) solution for injection in a pre-filled pen: EU summary of product characteristics. Paris: Sanofi-Aventis Groupe; 2017.
71. Soliqua 100/33 (insulin glargine and lixisenatide injection), for subcutaneous use: US prescribing information. Bridgewater: Sanofi-Aventis U.S. LLC; 2017.
72. Morales J. The pharmacologic basis for clinical differences among GLP-1 receptor agonists and DPP-4 inhibitors. *Postgrad Med*. 2011;123(6):189–201.
73. Madsbad S. Dipeptidyl peptidase-4 (DPP-4) inhibitors are favourable to glucagon-like peptide-1 (GLP-1) agonists: no. *Eur J Intern Med*. 2012;23(2):132–6.
74. Brunton S. GLP-1 receptor agonists vs. DPP-4 inhibitors for type 2 diabetes: is one approach more successful or preferable than the other? *Int J Clin Pract*. 2014;68(5):557–67.
75. Lee G, Oh SW, Hwang SS, et al. Comparative effectiveness of oral antidiabetic drugs in preventing cardiovascular mortality and morbidity: a network meta-analysis. *PLoS One*. 2017;12(5):e0177646.
76. Spain CV, Wright JJ, Hahn RM, et al. Self-reported barriers to adherence and persistence to treatment with injectable medications for type 2 diabetes. *Clin Ther*. 2016;38(7):1653–64.e1.
